# Supplementary material
Source: publisher site journal article supplement (https://www.dovepress.com/get_supplementary_file.php?f=238051-Table-S1.xlsx)
Supplement: Supplementary file 1 [file get_supplementary_file.php]

## Sheet: DEmRNA
gene	logFC	logCPM	PValue	FDR	|logFC|
A2ML1	3.51192	3.80578	3.15612e-21	1.13212e-20	3.51192
AADAC	-2.89811	0.243512	3.037e-31	1.68209e-30	2.89811
AADACL3	-2.99195	-3.76594	1.21292e-26	5.51864e-26	2.99195
AARD	2.22508	5.8964	3.56039e-21	1.27491e-20	2.22508
AASS	-1.74973	2.80435	5.12239e-93	1.27901e-91	1.74973
ABCA10	-3.29747	1.98522	2.63667e-192	2.52423e-190	3.29747
ABCA6	-2.62335	3.27836	4.57851e-152	2.83883e-150	2.62335
ABCA8	-3.83868	4.15524	7.04012e-213	8.07952e-211	3.83868
ABCA9	-3.5626	3.37567	2.56314e-241	4.01348e-239	3.5626
ABCB1	-1.97729	2.60695	1.52232e-87	3.5116e-86	1.97729
ABCB11	-1.96613	-2.0434	1.80334e-26	8.15274e-26	1.96613
ABCB5	-3.50858	0.0146191	7.26533e-125	3.19622e-123	3.50858
ABCC12	1.71389	1.28088	4.39472e-07	7.70045e-07	1.71389
ABCC9	-2.30196	4.03974	3.06509e-148	1.83876e-146	2.30196
ABCD2	-4.06729	1.89004	8.87872e-301	2.646e-298	4.06729
ABCG8	-1.61309	-3.02292	2.20671e-17	6.73607e-17	1.61309
ABI3BP	-2.08898	5.10513	2.85158e-70	4.80298e-69	2.08898
ABRA	-6.87217	-0.508979	2.19874e-284	5.49001e-282	6.87217
ACACB	-3.6039	5.99356	0	0	3.6039
ACADL	-3.28037	1.15926	1.41762e-78	2.80743e-77	3.28037
ACAN	4.35656	4.05524	1.55135e-40	1.19884e-39	4.35656
ACKR1	-2.27072	5.04884	2.19419e-48	2.15764e-47	2.27072
ACKR3	-1.71729	5.24053	2.81449e-71	4.84653e-70	1.71729
ACKR4	-1.59438	0.966365	4.88804e-48	4.76603e-47	1.59438
ACMSD	1.76424	0.290799	5.23582e-12	1.22088e-11	1.76424
ACO1	-1.98266	5.97964	1.25355e-246	2.06802e-244	1.98266
ACOD1	3.08453	-3.39946	4.84249e-20	1.66063e-19	3.08453
ACP7	2.77438	-1.20069	5.77962e-17	1.72688e-16	2.77438
ACRV1	1.64965	-1.77314	1.41074e-27	6.67166e-27	1.64965
ACSL1	-2.75043	7.46609	7.05626e-208	7.66932e-206	2.75043
ACSM2A	-1.7928	-3.14956	1.01827e-13	2.59048e-13	1.7928
ACSM2B	-1.91522	-3.2304	6.48299e-19	2.11674e-18	1.91522
ACSM3	-1.6299	2.40836	4.12611e-50	4.2615e-49	1.6299
ACSM5	-3.69718	1.89965	0	0	3.69718
ACSS2	-1.64256	5.76293	2.02197e-178	1.70593e-176	1.64256
ACTA1	-7.12862	6.49755	0	0	7.12862
ACTA2	-1.51923	8.4925	1.26107e-64	1.89438e-63	1.51923
ACTC1	-2.5782	0.0877125	2.62559e-41	2.08568e-40	2.5782
ACTG2	-1.83806	6.34385	3.6328e-24	1.49528e-23	1.83806
ACTL6B	4.32612	-1.01784	8.36117e-16	2.36729e-15	4.32612
ACTL8	7.90737	2.41752	1.11473e-40	8.63962e-40	7.90737
ACTN2	-6.057	4.29842	2.35972e-230	3.20592e-228	6.057
ACTN3	-6.46869	1.06297	0	0	6.46869
ACVR1C	-5.16902	3.2739	0	0	5.16902
ADAM18	4.11991	-3.27503	4.1063e-14	1.06592e-13	4.11991
ADAM19	1.73835	4.59412	2.71489e-51	2.89625e-50	1.73835
ADAM2	1.63499	-1.15264	0.00346634	0.00462004	1.63499
ADAM33	-2.63958	2.89861	1.4344e-113	5.26907e-112	2.63958
ADAM7	3.12373	-3.6465	2.80593e-07	4.98368e-07	3.12373
ADAM8	2.33765	4.52405	1.7464e-69	2.91756e-68	2.33765
ADAMDEC1	2.81606	3.2123	3.29318e-33	1.98203e-32	2.81606
ADAMTS1	-2.17709	6.19027	2.65066e-101	7.66451e-100	2.17709
ADAMTS14	3.16022	2.78406	5.92911e-85	1.29955e-83	3.16022
ADAMTS18	-1.58645	1.73889	5.96282e-23	2.32633e-22	1.58645
ADAMTS19	2.3055	1.18319	5.99902e-16	1.7095e-15	2.3055
ADAMTS20	4.34738	-1.89462	5.25437e-28	2.53884e-27	4.34738
ADAMTS5	-3.01239	4.58606	4.13005e-258	7.5603e-256	3.01239
ADAMTSL2	1.71768	3.30337	2.37781e-47	2.26468e-46	1.71768
ADAMTSL4	-1.72641	3.75102	8.27034e-66	1.2809e-64	1.72641
ADCY4	-1.70562	3.69085	7.37831e-94	1.86752e-92	1.70562
ADCYAP1R1	-2.5967	1.83464	1.02563e-113	3.77501e-112	2.5967
ADGB	1.83297	-2.35041	2.46108e-11	5.52869e-11	1.83297
ADGRB2	2.05347	5.12727	4.11852e-32	2.36182e-31	2.05347
ADGRB3	-1.59018	-0.854039	1.49233e-25	6.47728e-25	1.59018
ADGRD1	-2.48727	2.32814	1.91399e-111	6.71058e-110	2.48727
ADGRD2	-3.5411	0.330193	2.39258e-56	2.91607e-55	3.5411
ADGRF2	2.28012	-2.69079	5.80474e-14	1.49525e-13	2.28012
ADGRF4	3.44501	-0.161712	5.35987e-28	2.58913e-27	3.44501
ADGRF5	-1.88728	5.50759	5.75403e-161	4.05791e-159	1.88728
ADGRG3	-1.78462	-0.35256	4.8649e-42	3.95637e-41	1.78462
ADGRG4	-3.02404	-3.43155	1.2232e-57	1.54063e-56	3.02404
ADGRL3	-1.98668	2.06471	2.70958e-42	2.2261e-41	1.98668
ADGRL4	-1.61465	5.15696	4.23602e-107	1.3804e-105	1.61465
ADH1A	-4.7145	-1.53625	5.77506e-221	7.20985e-219	4.7145
ADH1B	-5.06398	7.34283	7.84636e-185	7.17709e-183	5.06398
ADH1C	-3.3769	1.6751	1.74059e-99	4.88025e-98	3.3769
ADH4	-3.63668	-1.69555	1.09165e-102	3.26384e-101	3.63668
ADHFE1	-1.92325	2.6338	7.17506e-98	1.95248e-96	1.92325
ADIPOQ	-5.15622	6.92798	3.83777e-174	3.09653e-172	5.15622
ADM2	2.24411	3.94796	8.11317e-61	1.10145e-59	2.24411
ADORA2A	1.66266	-0.88703	7.33805e-23	2.85082e-22	1.66266
ADRA1A	-4.40801	-0.237231	4.89713e-232	6.90719e-230	4.40801
ADRB2	-2.77102	2.10131	1.4073e-186	1.30666e-184	2.77102
ADRB3	-2.77688	-2.71438	3.55882e-57	4.43999e-56	2.77688
AFAP1L1	-1.53278	3.8363	1.372e-111	4.84711e-110	1.53278
AGBL1	-5.56864	-2.51109	5.66692e-129	2.64413e-127	5.56864
AGMO	-2.05183	-0.40431	9.0468e-48	8.74256e-47	2.05183
AGPAT2	-1.65975	6.11677	1.40666e-83	3.01169e-82	1.65975
AGR2	2.48201	9.20153	3.25946e-23	1.28824e-22	2.48201
AGR3	2.42107	6.80181	3.81977e-19	1.25897e-18	2.42107
AGT	1.61328	4.51074	1.63389e-12	3.92273e-12	1.61328
AHSG	3.74901	-2.58725	1.61811e-10	3.48175e-10	3.74901
AICDA	1.98772	-1.19	4.01368e-08	7.51985e-08	1.98772
AIFM2	-1.75492	4.7419	7.91838e-139	4.20425e-137	1.75492
AIM1L	3.29297	1.67311	3.57453e-66	5.59717e-65	3.29297
AIM2	1.96892	1.26313	1.61874e-22	6.19117e-22	1.96892
AIPL1	1.99007	-3.47041	4.34996e-07	7.62346e-07	1.99007
AK5	-2.31615	4.34776	1.35985e-56	1.66729e-55	2.31615
AKAP12	-2.64632	5.71514	2.33013e-180	2.01186e-178	2.64632
AKAP14	3.16447	-2.19586	2.67818e-17	8.12956e-17	3.16447
AKAP6	-2.18732	2.39876	4.37195e-105	1.36916e-103	2.18732
AKR1C1	-3.42295	4.2244	3.56063e-127	1.61249e-125	3.42295
AKR1C2	-3.00772	4.83378	3.40306e-66	5.3468e-65	3.00772
AKR1C3	-2.31392	4.65524	2.09955e-91	5.1044e-90	2.31392
AKR1D1	-1.64616	-0.402976	8.43884e-12	1.94419e-11	1.64616
AKR7A3	2.63294	4.75222	1.57563e-27	7.42675e-27	2.63294
ALAS2	-3.20464	-2.38813	7.10244e-120	2.91626e-118	3.20464
ALDH1A1	-2.4911	5.11714	2.00494e-144	1.16129e-142	2.4911
ALDH1A2	-2.76217	2.14005	3.21634e-127	1.46015e-125	2.76217
ALDH1A3	-1.61739	4.55843	1.67714e-42	1.38403e-41	1.61739
ALDH1L1	-4.68544	3.19288	3.67683e-272	7.99256e-270	4.68544
ALDH2	-2.23025	7.00134	8.61877e-144	4.96103e-142	2.23025
ALDOC	-1.86125	4.53204	8.53372e-55	1.0024e-53	1.86125
ALG1L	2.18586	1.14445	1.32719e-20	4.65501e-20	2.18586
ALPI	3.90671	-3.64068	5.47347e-11	1.20742e-10	3.90671
ALPK3	-2.5264	3.6873	7.50787e-212	8.40745e-210	2.5264
ALPP	3.4371	-3.03265	3.7914e-12	8.9059e-12	3.4371
ALPPL2	2.16558	-4.25097	8.4163e-08	1.54488e-07	2.16558
ALX3	1.79524	-2.3165	1.53309e-08	2.94366e-08	1.79524
ALX4	-2.28614	2.03666	8.74191e-47	8.17845e-46	2.28614
AMELX	3.98876	-3.43653	5.15635e-09	1.01778e-08	3.98876
AMER2	2.79855	-0.935271	4.56663e-09	9.04078e-09	2.79855
AMER3	5.13385	-0.721384	1.14581e-17	3.54389e-17	5.13385
AMPD1	-4.5834	0.817075	1.78194e-214	2.11057e-212	4.5834
AMTN	3.6446	0.0757139	2.51634e-13	6.28133e-13	3.6446
AMY2A	2.79461	-2.33761	1.01355e-08	1.96819e-08	2.79461
AMZ1	2.73217	2.15407	3.00862e-37	2.08359e-36	2.73217
ANGPT1	-2.73737	2.8746	3.25735e-135	1.64893e-133	2.73737
ANGPT4	-3.41287	-0.290239	1.9831e-230	2.7142e-228	3.41287
ANGPTL1	-3.02212	2.54096	3.81426e-154	2.42186e-152	3.02212
ANGPTL2	-1.79333	6.48658	6.41667e-98	1.74868e-96	1.79333
ANGPTL4	-1.82949	4.61274	1.93943e-40	1.49126e-39	1.82949
ANGPTL5	-4.03607	-1.53334	3.95893e-178	3.32496e-176	4.03607
ANGPTL7	-4.06154	0.472125	3.05232e-106	9.7574e-105	4.06154
ANGPTL8	-3.81229	-0.840956	2.98238e-159	2.04853e-157	3.81229
ANK2	-2.29934	4.29142	1.29123e-135	6.59063e-134	2.29934
ANKRD1	-2.12913	0.629939	1.29557e-25	5.6405e-25	2.12913
ANKRD2	-3.62248	-0.593957	2.10547e-160	1.47359e-158	3.62248
ANKRD22	2.17588	2.84289	1.24146e-45	1.12388e-44	2.17588
ANKRD29	-2.14475	2.81134	7.69193e-80	1.5465e-78	2.14475
ANKRD30B	2.26682	3.5757	9.30458e-14	2.37099e-13	2.26682
ANKRD34B	2.01095	-1.47824	5.43689e-11	1.19978e-10	2.01095
ANKRD53	-2.63797	0.229322	1.50303e-212	1.71429e-210	2.63797
ANKRD62	1.57535	-3.32671	4.20765e-09	8.34799e-09	1.57535
ANKRD66	2.23229	-3.36032	6.15728e-09	1.21004e-08	2.23229
ANLN	3.41882	5.49796	4.95456e-100	1.39764e-98	3.41882
ANO3	-1.54038	1.13321	1.33731e-13	3.38116e-13	1.54038
ANO7	1.52034	1.58526	1.40406e-21	5.13111e-21	1.52034
ANO9	1.54046	4.1773	2.12714e-35	1.38245e-34	1.54046
ANTXR2	-1.74585	5.52377	1.60071e-144	9.33005e-143	1.74585
ANXA1	-2.29901	7.68225	5.96049e-159	4.06391e-157	2.29901
ANXA9	1.80984	5.37365	1.03455e-34	6.55309e-34	1.80984
AOC1	3.60182	2.02721	5.29733e-30	2.79574e-29	3.60182
AOC2	-2.21583	0.536854	8.37187e-105	2.60855e-103	2.21583
AOC3	-3.91491	6.35602	0	0	3.91491
AOX1	-2.19861	4.07095	6.26641e-63	9.08114e-62	2.19861
AP1M2	1.6347	6.77761	3.55758e-59	4.64875e-58	1.6347
APCDD1	-2.10419	4.8623	3.42608e-113	1.24859e-111	2.10419
APCDD1L	-1.76576	2.87772	1.5805e-29	8.18465e-29	1.76576
APCS	7.48992	-1.35492	1.25872e-13	3.18768e-13	7.48992
APLP1	2.66693	3.90779	3.86786e-32	2.22222e-31	2.66693
APOA1	3.78181	0.163251	4.99408e-27	2.31325e-26	3.78181
APOA2	6.45271	0.298227	5.40269e-18	1.69368e-17	6.45271
APOA4	1.94116	-4.21937	0.00113532	0.00157605	1.94116
APOA5	2.24709	-3.27757	3.46344e-10	7.29443e-10	2.24709
APOB	-4.23068	1.25832	2.62211e-109	8.85716e-108	4.23068
APOBEC1	2.59554	-4.14137	1.6755e-09	3.39826e-09	2.59554
APOBEC2	-6.14137	0.449629	0	0	6.14137
APOBEC3A	1.57265	0.494897	3.17117e-13	7.87128e-13	1.57265
APOBEC3B	2.63615	3.44478	7.96268e-42	6.41633e-41	2.63615
APOBEC4	3.69189	-2.33964	6.16464e-16	1.75588e-15	3.69189
APOBR	1.50562	4.17952	1.00982e-26	4.6173e-26	1.50562
APOC3	5.13108	-1.13133	9.78558e-11	2.12966e-10	5.13108
APOF	1.55803	-0.400269	1.6177e-09	3.28501e-09	1.55803
APOH	4.02057	-1.8782	3.98253e-08	7.46528e-08	4.02057
APOLD1	-2.01019	5.46815	4.3277e-116	1.64872e-114	2.01019
AQP1	-2.04439	7.40378	2.74233e-123	1.18388e-121	2.04439
AQP12B	3.00279	-4.22516	9.64736e-09	1.87577e-08	3.00279
AQP4	-2.29	0.970937	9.02205e-35	5.72657e-34	2.29
AQP7	-5.08062	4.03262	8.85965e-268	1.7989e-265	5.08062
ARHGAP11A	2.2753	4.44451	3.51326e-77	6.78312e-76	2.2753
ARHGAP20	-3.04087	2.1484	1.18575e-273	2.67183e-271	3.04087
ARHGAP39	1.7465	4.74946	6.01492e-77	1.15049e-75	1.7465
ARHGEF15	-1.78792	4.14846	1.08839e-125	4.82257e-124	1.78792
ARHGEF39	1.81492	2.72802	8.1437e-62	1.13907e-60	1.81492
ARL14	2.94698	-2.91837	8.19027e-15	2.20343e-14	2.94698
ARL4A	-1.50097	4.50325	2.25927e-75	4.24664e-74	1.50097
ARMC3	2.91043	1.42709	1.16669e-35	7.67792e-35	2.91043
ARMT1	1.52606	6.95046	3.85919e-22	1.4502e-21	1.52606
ARSI	1.60226	2.34044	9.68981e-28	4.62393e-27	1.60226
ART1	-3.03866	-2.66384	2.94292e-51	3.13589e-50	3.03866
ART3	1.72568	2.84249	4.23295e-06	6.94479e-06	1.72568
ARTN	3.26982	2.24177	1.26323e-58	1.63222e-57	3.26982
ASB10	-6.02689	-3.16703	1.5316e-92	3.78841e-91	6.02689
ASB11	-6.35763	-1.75344	1.42143e-275	3.28298e-273	6.35763
ASB12	-2.77146	-2.00005	1.82249e-97	4.93755e-96	2.77146
ASB15	-4.31039	-1.41761	4.05423e-99	1.12986e-97	4.31039
ASB2	-2.06866	1.33932	2.3566e-73	4.26056e-72	2.06866
ASB4	-2.51776	-1.32631	2.58427e-54	2.98995e-53	2.51776
ASB5	-6.27385	-0.363157	3.25987e-139	1.75095e-137	6.27385
ASCL1	5.2281	2.56868	5.70536e-20	1.94821e-19	5.2281
ASCL2	2.14751	2.25781	3.69478e-25	1.58212e-24	2.14751
ASCL4	2.89966	-1.89423	5.74294e-18	1.79912e-17	2.89966
ASF1B	3.11985	4.74278	3.59639e-133	1.77201e-131	3.11985
ASIC2	1.75392	0.249324	9.0372e-09	1.76058e-08	1.75392
ASIC3	1.68822	1.21629	1.11068e-29	5.79226e-29	1.68822
ASIC5	3.62886	-3.72787	3.42977e-18	1.08384e-17	3.62886
ASPA	-3.53233	1.40363	2.25724e-277	5.27937e-275	3.53233
ASPHD1	1.78998	2.41714	1.7145e-19	5.7213e-19	1.78998
ASPM	3.57334	5.00605	6.76383e-103	2.02882e-101	3.57334
ASPN	1.87468	6.86582	1.61229e-23	6.46352e-23	1.87468
ASTN1	-1.94367	0.741907	3.25011e-36	2.16874e-35	1.94367
ASZ1	4.32898	-3.18601	1.10385e-14	2.95078e-14	4.32898
ATAD2	2.01555	6.44863	1.31437e-63	1.93511e-62	2.01555
ATF3	-1.99851	5.84723	6.9541e-65	1.0558e-63	1.99851
ATG9B	1.77928	1.85942	4.26643e-32	2.44588e-31	1.77928
ATOH8	-3.2219	2.25524	5.29069e-185	4.86348e-183	3.2219
ATP13A5	-1.54798	2.64546	1.67254e-13	4.21144e-13	1.54798
ATP1A2	-4.48702	3.92787	5.25338e-198	5.10877e-196	4.48702
ATP1A3	3.26853	2.06272	3.59292e-37	2.48173e-36	3.26853
ATP1B4	-5.95905	-2.22955	3.42258e-156	2.2505e-154	5.95905
ATP2A1	-6.26625	4.00517	0	0	6.26625
ATP2A3	1.6666	6.68838	6.13355e-29	3.09137e-28	1.6666
ATP2B3	2.38848	-2.03648	5.06697e-12	1.1827e-11	2.38848
AUNIP	2.26552	2.10513	4.68012e-69	7.77649e-68	2.26552
AURKA	3.16651	4.67452	3.15805e-107	1.03094e-105	3.16651
AURKB	3.44521	3.76192	7.5978e-90	1.80675e-88	3.44521
AVPR1A	-1.59755	3.00524	3.46433e-66	5.43844e-65	1.59755
AVPR2	-2.69196	0.688833	2.48715e-122	1.06377e-120	2.69196
AWAT1	1.97764	-2.71042	3.71934e-08	6.98043e-08	1.97764
AXDND1	1.547	-1.39316	1.0554e-18	3.41159e-18	1.547
AZU1	1.68234	0.31657	1.60133e-11	3.63665e-11	1.68234
B3GALT1	-3.10516	-0.479502	9.9491e-117	3.82978e-115	3.10516
B4GALNT2	2.4183	2.40139	1.71752e-12	4.1171e-12	2.4183
B4GALNT3	1.82304	4.98704	1.93825e-29	9.99529e-29	1.82304
B4GALNT4	1.99473	4.99469	2.58821e-48	2.54103e-47	1.99473
BARHL2	2.58592	-3.78042	9.09495e-08	1.66615e-07	2.58592
BARX1	2.52137	0.907981	1.22054e-14	3.25441e-14	2.52137
BBOX1	-1.98618	3.11369	6.34488e-27	2.92355e-26	1.98618
BCAS1	2.51125	5.4427	1.42028e-26	6.44937e-26	2.51125
BCAS4	2.09062	5.03266	8.07687e-57	9.94909e-56	2.09062
BCL2A1	1.6675	2.45812	3.52566e-17	1.06496e-16	1.6675
BEX1	2.87318	3.75862	5.0095e-13	1.2325e-12	2.87318
BFSP2	2.13608	-0.992842	4.64108e-20	1.59274e-19	2.13608
BGN	2.3965	9.56788	1.21666e-83	2.61094e-82	2.3965
BHLHA15	1.51718	-0.0230287	8.77978e-16	2.48353e-15	1.51718
BHMT2	-3.10177	2.66887	1.55131e-203	1.61941e-201	3.10177
BICDL1	2.79477	4.60309	2.89253e-108	9.61245e-107	2.79477
BIK	1.68631	3.75194	3.96905e-35	2.55526e-34	1.68631
BIN1	-1.5941	4.6611	4.01032e-62	5.69114e-61	1.5941
BIRC5	3.62728	5.57442	3.56663e-93	8.91754e-92	3.62728
BLM	2.03337	3.40028	6.11665e-63	8.87107e-62	2.03337
BLOC1S5-TXNDC5	-1.50798	-1.4017	8.02925e-29	4.0205e-28	1.50798
BMP2	-2.11674	1.74913	8.18103e-65	1.23902e-63	2.11674
BMP3	-3.36298	0.322442	6.26453e-58	7.94985e-57	3.36298
BMP6	-1.81719	2.41066	3.40095e-53	3.79236e-52	1.81719
BMP8A	2.46	0.409008	6.41541e-75	1.19735e-73	2.46
BMPER	-1.9849	1.34994	2.87702e-37	1.99395e-36	1.9849
BMPR1B	4.29359	7.5607	9.19235e-34	5.62222e-33	4.29359
BMX	-2.64367	0.954263	4.23855e-137	2.20608e-135	2.64367
BOC	-1.55112	4.93241	1.54366e-46	1.43183e-45	1.55112
BOLA2B	1.76147	-0.952051	4.35495e-38	3.09724e-37	1.76147
BPIFA1	5.88096	1.71115	6.63096e-11	1.45649e-10	5.88096
BPIFA2	5.31003	-1.7945	2.39291e-17	7.2888e-17	5.31003
BPIFB1	4.06534	5.5173	7.80978e-28	3.74517e-27	4.06534
BPIFB2	2.15413	4.46679	8.22195e-09	1.6047e-08	2.15413
BPIFB3	4.3713	-2.89624	1.76079e-08	3.37036e-08	4.3713
BPIFB4	3.59797	-1.61548	5.66951e-12	1.32034e-11	3.59797
BPIFB6	4.60413	-2.50525	5.69702e-17	1.70302e-16	4.60413
BRCA2	1.58341	3.57339	2.06367e-49	2.08022e-48	1.58341
BRDT	1.95054	-0.883708	1.71542e-10	3.686e-10	1.95054
BRINP1	-1.65138	1.97924	4.58092e-19	1.50474e-18	1.65138
BRINP2	1.91325	2.94803	1.82728e-09	3.69597e-09	1.91325
BRINP3	3.13017	3.40631	2.24751e-09	4.52417e-09	3.13017
BRIP1	2.24891	3.59029	1.70065e-61	2.35908e-60	2.24891
BRSK2	2.9097	1.45551	1.21768e-30	6.58446e-30	2.9097
BTNL2	-1.74442	-3.4818	7.27292e-27	3.34366e-26	1.74442
BUB1	3.34157	4.73808	7.75896e-113	2.81655e-111	3.34157
BUB1B	3.00609	4.32036	5.58065e-109	1.87821e-107	3.00609
C10orf10	-2.17922	6.69044	6.46334e-117	2.49839e-115	2.17922
C10orf113	2.53645	-2.87951	4.01506e-11	8.91982e-11	2.53645
C10orf128	-1.75042	3.08247	2.05967e-98	5.66318e-97	1.75042
C10orf142	-2.17911	-3.07543	1.1689e-69	1.95455e-68	2.17911
C10orf54	-1.53058	5.18319	1.47905e-85	3.28861e-84	1.53058
C10orf67	1.82005	-2.35294	1.3513e-10	2.9158e-10	1.82005
C10orf71	-7.51102	0.764031	1.18529e-108	3.96031e-107	7.51102
C10orf82	2.28018	2.44992	2.67672e-13	6.67177e-13	2.28018
C10orf90	-2.40091	0.41222	2.15399e-39	1.60352e-38	2.40091
C11orf53	-1.6858	-1.27593	5.78514e-28	2.78873e-27	1.6858
C11orf86	3.54937	-1.09486	2.11955e-11	4.78062e-11	3.54937
C11orf87	-2.16452	-2.97312	1.15729e-30	6.2689e-30	2.16452
C12orf54	-1.59121	-2.05632	3.29087e-38	2.35497e-37	1.59121
C12orf56	2.38711	-1.20209	1.83741e-12	4.39879e-12	2.38711
C14orf105	2.41333	-3.38255	5.66437e-09	1.11543e-08	2.41333
C14orf180	-5.06797	1.66954	8.74494e-165	6.46321e-163	5.06797
C16orf59	2.90172	2.93324	1.48079e-110	5.08559e-109	2.90172
C16orf71	1.80099	1.95435	2.78166e-42	2.28328e-41	1.80099
C16orf92	2.30532	-3.42753	4.91545e-19	1.61291e-18	2.30532
C19orf33	2.85828	4.17419	5.02046e-32	2.86837e-31	2.85828
C19orf45	2.05264	0.321441	4.74593e-41	3.72517e-40	2.05264
C19orf81	1.68889	-2.1817	2.63848e-10	5.59587e-10	1.68889
C1orf105	4.04033	-1.21134	1.13465e-21	4.16882e-21	4.04033
C1orf106	1.68315	3.49976	5.32432e-14	1.37456e-13	1.68315
C1orf141	2.48392	-4.07083	1.18646e-07	2.15749e-07	2.48392
C1orf158	2.4508	-2.31847	1.83656e-10	3.93576e-10	2.4508
C1orf167	2.59377	-0.890547	2.11582e-16	6.16042e-16	2.59377
C1orf186	1.65354	2.2384	2.98853e-11	6.68268e-11	1.65354
C1orf189	2.1312	-1.70097	2.79552e-24	1.15503e-23	2.1312
C1orf194	2.32182	-0.311483	1.67753e-26	7.59143e-26	2.32182
C1orf68	5.40312	-2.73311	1.49675e-11	3.40375e-11	5.40312
C1orf94	2.73361	-2.17301	2.02411e-07	3.62679e-07	2.73361
C1QTNF1	-1.5983	5.23713	1.59415e-63	2.33956e-62	1.5983
C1QTNF6	2.27351	5.52167	1.0863e-91	2.65847e-90	2.27351
C1QTNF7	-2.4433	1.89637	1.35005e-75	2.54022e-74	2.4433
C1QTNF9	-3.59374	-1.40098	1.54511e-215	1.84188e-213	3.59374
C20orf144	1.97083	-0.979463	2.24618e-46	2.06893e-45	1.97083
C20orf85	5.57265	0.322245	4.50308e-17	1.35268e-16	5.57265
C21orf58	1.77701	3.29555	1.36025e-66	2.15367e-65	1.77701
C2CD2	-1.65832	5.53014	5.1152e-133	2.50699e-131	1.65832
C2CD4A	2.29529	2.48653	2.78784e-13	6.94123e-13	2.29529
C2CD4B	-2.0273	1.19069	4.77914e-40	3.63242e-39	2.0273
C2orf40	-2.88105	2.76639	1.04731e-64	1.57969e-63	2.88105
C2orf50	1.86348	0.802686	2.29817e-18	7.33009e-18	1.86348
C2orf54	3.56512	4.12144	3.78128e-27	1.76075e-26	3.56512
C2orf78	3.06146	-3.80008	4.30145e-08	8.04757e-08	3.06146
C2orf88	-2.18242	2.3273	2.33252e-73	4.22116e-72	2.18242
C3orf30	2.37477	-4.15401	1.3579e-08	2.61653e-08	2.37477
C3orf36	1.93705	-1.00862	1.14882e-47	1.10845e-46	1.93705
C3orf52	1.63179	4.06538	6.16228e-29	3.10416e-28	1.63179
C3orf67	2.15369	2.27197	1.26925e-54	1.48243e-53	2.15369
C3orf80	1.9942	2.15321	4.00716e-65	6.11397e-64	1.9942
C4orf26	1.7404	-2.58026	1.94905e-14	5.14686e-14	1.7404
C4orf48	2.06412	1.81769	1.54627e-32	9.03268e-32	2.06412
C4orf50	2.33474	-2.35268	2.69635e-22	1.02112e-21	2.33474
C4orf51	2.79469	-2.44532	1.23109e-15	3.46276e-15	2.79469
C5AR2	1.5783	4.39007	6.33209e-23	2.46675e-22	1.5783
C5orf38	1.52595	4.33506	2.02269e-14	5.33674e-14	1.52595
C5orf46	1.81996	2.04724	2.50387e-17	7.61798e-17	1.81996
C5orf49	1.70772	1.88927	1.87052e-23	7.4825e-23	1.70772
C6	-3.11647	1.88584	3.62335e-71	6.21622e-70	3.11647
C6orf118	2.5257	-2.56672	1.2578e-10	2.71817e-10	2.5257
C6orf141	1.72085	3.93167	4.3318e-16	1.24438e-15	1.72085
C6orf15	2.11404	2.09021	1.59712e-07	2.88014e-07	2.11404
C6orf222	3.55002	-2.80677	1.02741e-22	3.96896e-22	3.55002
C6orf58	-1.98066	-2.64337	6.45391e-56	7.77879e-55	1.98066
C7	-1.64661	4.9505	7.79585e-19	2.53465e-18	1.64661
C7orf33	3.34337	-3.85055	5.18339e-12	1.2088e-11	3.34337
C7orf57	1.9448	-1.79884	8.53302e-12	1.96516e-11	1.9448
C7orf62	1.70641	-4.18683	1.24932e-05	1.99324e-05	1.70641
C7orf77	2.38842	-3.6904	3.52932e-10	7.42979e-10	2.38842
C8A	4.37143	-2.90245	7.94904e-10	1.63959e-09	4.37143
C8G	1.51668	-0.482887	1.88596e-21	6.84481e-21	1.51668
C8orf22	-5.89198	-1.0548	6.38456e-71	1.08726e-69	5.89198
C8orf86	1.79972	-1.18628	9.18336e-12	2.11177e-11	1.79972
C8orf88	-2.03435	-0.170336	5.25208e-102	1.54281e-100	2.03435
C9	2.5749	-2.04451	3.65833e-09	7.28629e-09	2.5749
C9orf116	2.09443	3.19184	1.25134e-53	1.4176e-52	2.09443
C9orf135	1.8787	-2.02629	4.64356e-06	7.60158e-06	1.8787
C9orf172	2.09526	2.46632	4.71459e-60	6.28964e-59	2.09526
CA10	2.9703	-0.736692	1.51072e-08	2.90222e-08	2.9703
CA12	1.80273	8.80268	3.73179e-22	1.40375e-21	1.80273
CA3	-5.97191	4.59108	0	0	5.97191
CA4	-5.21937	1.46411	1.52151e-202	1.56183e-200	5.21937
CA9	4.8357	2.68526	1.11015e-31	6.2633e-31	4.8357
CABP1	-2.17386	-0.382038	1.91039e-142	1.0861e-140	2.17386
CABP7	2.36063	-0.388238	1.0558e-26	4.81917e-26	2.36063
CACHD1	-2.05917	4.26784	1.30576e-128	6.04676e-127	2.05917
CACNA1B	2.6694	0.22254	1.19189e-21	4.37164e-21	2.6694
CACNA1E	1.62245	-0.724854	1.57548e-19	5.26595e-19	1.62245
CACNA1H	2.41623	5.3608	3.41087e-25	1.46394e-24	2.41623
CACNA1I	1.53379	1.33103	3.04554e-15	8.37761e-15	1.53379
CACNA1S	-6.93232	1.01632	1.05143e-182	9.38512e-181	6.93232
CACNA2D1	-1.90379	4.01278	1.95038e-88	4.56168e-87	1.90379
CACNB3	1.50173	5.49605	1.74319e-64	2.61013e-63	1.50173
CACNG2	-2.23035	-3.02324	8.363e-13	2.03937e-12	2.23035
CACNG4	2.47377	6.55486	1.65998e-29	8.58424e-29	2.47377
CACNG5	2.51078	-4.21632	9.49544e-12	2.18055e-11	2.51078
CACNG7	1.86171	-3.93671	3.33153e-07	5.88722e-07	1.86171
CADM3	-2.17876	2.31237	2.25119e-44	1.95742e-43	2.17876
CADPS	3.3447	1.04909	3.16283e-33	1.90481e-32	3.3447
CALB2	-2.03725	4.30023	1.07189e-33	6.53856e-33	2.03725
CALCA	1.58372	-1.59491	0.00052143	0.000743286	1.58372
CALCB	1.7092	-2.3285	5.52722e-08	1.02671e-07	1.7092
CALHM1	2.92462	-1.47937	2.88167e-28	1.40933e-27	2.92462
CALHM3	1.605	-3.13046	1.46359e-10	3.15403e-10	1.605
CALML5	2.72725	6.32214	3.98248e-14	1.03392e-13	2.72725
CALR3	1.60932	-3.66002	4.84385e-10	1.01175e-09	1.60932
CALY	2.16907	-1.73126	3.21245e-14	8.39198e-14	2.16907
CAMK2A	-3.00758	0.1328	1.58978e-130	7.60995e-129	3.00758
CAMK2N2	3.17195	0.03532	2.18334e-51	2.33458e-50	3.17195
CAMKV	2.14621	-1.3016	3.90756e-09	7.77179e-09	2.14621
CAMP	4.40458	0.841095	3.52464e-45	3.14612e-44	4.40458
CAPN11	-2.29364	1.02916	5.15149e-98	1.41014e-96	2.29364
CAPN13	1.90335	5.24583	1.37716e-24	5.75178e-24	1.90335
CAPN3	-3.05012	0.332759	1.09332e-200	1.08609e-198	3.05012
CAPN9	2.77946	3.10867	1.668e-36	1.12275e-35	2.77946
CAPNS2	1.73479	-1.1786	1.50108e-06	2.53453e-06	1.73479
CAPS	2.24457	5.59793	9.66816e-43	8.03592e-42	2.24457
CAPSL	4.01551	0.400817	3.47181e-35	2.23748e-34	4.01551
CAPZA3	-2.72045	-2.90268	8.3275e-42	6.70153e-41	2.72045
CARD17	3.00257	-2.34997	6.58438e-25	2.79549e-24	3.00257
CARD18	1.90703	-1.95195	0.000715184	0.00100897	1.90703
CARMIL2	1.75545	2.36235	1.1971e-22	4.61385e-22	1.75545
CARTPT	6.81613	6.99829	6.6418e-12	1.53939e-11	6.81613
CASKIN1	1.66671	1.40706	1.10893e-26	5.05669e-26	1.66671
CASP12	-2.10387	-2.0603	3.78743e-85	8.36086e-84	2.10387
CASP14	6.78504	5.30432	4.42267e-29	2.24561e-28	6.78504
CASP16P	1.7778	0.668304	1.07571e-19	3.63096e-19	1.7778
CASQ1	-4.8313	2.76118	1.01871e-251	1.77573e-249	4.8313
CASQ2	-3.38875	1.7947	3.27698e-179	2.80318e-177	3.38875
CAT	-1.97956	6.77091	6.95093e-263	1.33784e-260	1.97956
CATIP	1.77495	-0.538697	1.03347e-20	3.63447e-20	1.77495
CATSPER1	1.81039	-0.648171	1.65427e-34	1.04214e-33	1.81039
CAV1	-3.33457	7.20119	0	0	3.33457
CAV2	-2.858	5.55248	8.52419e-295	2.38639e-292	2.858
CAV3	-5.06006	-1.69272	3.85927e-199	3.79296e-197	5.06006
CBLC	1.52276	4.33547	1.82775e-27	8.59104e-27	1.52276
CBLN2	6.13632	3.93519	7.97447e-35	5.07035e-34	6.13632
CBS	2.00966	-0.199654	4.58654e-18	1.44174e-17	2.00966
CBSL	1.50422	-1.49249	7.09074e-08	1.30819e-07	1.50422
CBX2	2.7381	4.66518	1.17227e-43	1.00278e-42	2.7381
CBX4	1.77269	5.83114	1.31989e-70	2.23126e-69	1.77269
CBX8	1.55206	3.65221	4.04829e-59	5.27877e-58	1.55206
CCBE1	-1.85641	1.17044	5.17205e-50	5.31502e-49	1.85641
CCDC141	-2.58002	-0.233196	7.79083e-108	2.57056e-106	2.58002
CCDC151	2.24025	0.960005	3.46027e-31	1.90966e-30	2.24025
CCDC154	1.76476	0.980071	2.18969e-26	9.8825e-26	1.76476
CCDC158	-1.5191	1.21261	4.13241e-35	2.65673e-34	1.5191
CCDC166	1.50851	-3.89769	3.14591e-08	5.93011e-08	1.50851
CCDC167	1.97814	4.09327	1.78795e-87	4.11406e-86	1.97814
CCDC172	5.04705	-2.45377	2.15059e-10	4.58427e-10	5.04705
CCDC175	2.07079	-2.8252	1.1275e-09	2.30784e-09	2.07079
CCDC178	-2.94394	-0.0663322	9.85508e-133	4.80455e-131	2.94394
CCDC185	2.87089	-2.19604	1.05784e-24	4.44526e-24	2.87089
CCDC187	4.72005	-1.20219	1.40005e-31	7.86759e-31	4.72005
CCDC189	1.81244	0.830397	6.42852e-42	5.19369e-41	1.81244
CCDC3	-2.76055	4.93202	5.0684e-210	5.60771e-208	2.76055
CCDC36	-1.94928	-0.116155	3.49202e-98	9.573e-97	1.94928
CCDC60	3.50198	-1.17763	1.58108e-16	4.63341e-16	3.50198
CCDC69	-2.91171	5.19681	6.31662e-251	1.08067e-248	2.91171
CCDC74A	1.85643	5.36352	5.20858e-20	1.78286e-19	1.85643
CCDC74B	1.57686	2.96651	7.48817e-17	2.22442e-16	1.57686
CCDC78	3.60017	2.96142	1.22997e-68	2.01294e-67	3.60017
CCDC8	-1.69454	4.27611	1.33572e-53	1.51227e-52	1.69454
CCDC80	-1.8035	8.10485	1.43282e-68	2.34078e-67	1.8035
CCDC83	2.03597	-2.15646	4.42335e-16	1.2693e-15	2.03597
CCDC85A	-1.97685	0.414813	3.94995e-54	4.56145e-53	1.97685
CCDC87	1.69472	1.06308	2.73914e-38	1.96574e-37	1.69472
CCK	1.60438	-2.6449	1.68129e-05	2.65856e-05	1.60438
CCKAR	1.61838	-3.11078	1.21126e-09	2.47462e-09	1.61838
CCKBR	4.10116	0.180478	2.50839e-16	7.27933e-16	4.10116
CCL1	1.85766	-3.8967	2.559e-10	5.4323e-10	1.85766
CCL11	4.2215	0.510232	3.23431e-84	7.02237e-83	4.2215
CCL13	-1.95098	1.06561	1.0913e-32	6.42571e-32	1.95098
CCL14	-3.25707	1.73088	1.27637e-141	7.14654e-140	3.25707
CCL16	-2.15535	-2.54889	7.56657e-53	8.3517e-52	2.15535
CCL17	1.86031	0.0507887	3.70817e-20	1.27781e-19	1.86031
CCL20	2.55172	0.551185	2.55169e-24	1.05617e-23	2.55172
CCL21	-2.28021	4.14283	2.47537e-41	1.96889e-40	2.28021
CCL23	-1.94486	-1.66718	4.79167e-53	5.31746e-52	1.94486
CCL24	-2.15682	-1.89681	6.17655e-26	2.73024e-25	2.15682
CCL28	-2.35816	5.39327	1.47593e-60	1.99493e-59	2.35816
CCL7	3.6963	-0.728236	2.15945e-24	8.95625e-24	3.6963
CCM2L	-1.60932	2.06138	1.08233e-99	3.03924e-98	1.60932
CCNA2	2.91358	4.59635	9.15808e-93	2.27744e-91	2.91358
CCNB1	2.6225	5.67687	1.25739e-118	5.02874e-117	2.6225
CCNB2	3.09799	4.61513	5.66702e-101	1.62845e-99	3.09799
CCNE1	2.84681	3.13123	1.81216e-45	1.62935e-44	2.84681
CCNE2	2.47365	3.11765	2.80705e-69	4.6726e-68	2.47365
CCNF	1.8005	4.96971	1.96067e-96	5.24272e-95	1.8005
CCNI2	1.88511	0.967269	1.25427e-21	4.59276e-21	1.88511
CCNO	2.51684	3.70985	9.72642e-25	4.09841e-24	2.51684
CCR4	1.75826	1.95019	5.7282e-25	2.43983e-24	1.75826
CCR7	1.70002	3.01915	2.37034e-18	7.55639e-18	1.70002
CCR8	3.2351	-0.341123	1.41082e-46	1.31257e-45	3.2351
CD177	4.95993	3.21898	7.73774e-31	4.22489e-30	4.95993
CD19	1.67937	1.14161	3.45987e-11	7.71333e-11	1.67937
CD1A	2.99091	0.85394	2.72241e-23	1.07869e-22	2.99091
CD207	1.56638	1.91855	2.40453e-12	5.71721e-12	1.56638
CD209	-2.56872	2.56232	4.65755e-110	1.58194e-108	2.56872
CD24	1.61921	10.1297	9.56152e-21	3.36896e-20	1.61921
CD248	-1.62332	5.9069	5.01575e-77	9.63368e-76	1.62332
CD300LG	-4.95632	3.39834	3.54438e-235	5.28141e-233	4.95632
CD302	-1.62069	3.41387	2.77047e-90	6.62226e-89	1.62069
CD34	-2.05987	6.4893	2.43872e-212	2.76443e-210	2.05987
CD36	-4.13555	7.8071	3.19097e-226	4.18152e-224	4.13555
CD80	2.2725	0.449506	4.9125e-53	5.44827e-52	2.2725
CDC14B	-1.76997	3.92308	4.106e-144	2.37083e-142	1.76997
CDC20	3.59383	5.31111	6.84131e-94	1.73398e-92	3.59383
CDC20B	5.23269	2.82601	2.77246e-25	1.19549e-24	5.23269
CDC25A	2.22339	3.08123	7.71822e-57	9.51364e-56	2.22339
CDC25C	3.4404	2.58612	1.52265e-129	7.19538e-128	3.4404
CDC45	2.9598	3.43945	8.20307e-86	1.83719e-84	2.9598
CDC6	3.05883	4.9144	1.93721e-67	3.09903e-66	3.05883
CDC7	1.81129	3.68756	6.96455e-55	8.18601e-54	1.81129
CDCA2	2.97985	3.27589	1.31677e-71	2.29095e-70	2.97985
CDCA3	3.11387	3.9678	1.84837e-98	5.08976e-97	3.11387
CDCA5	3.15466	4.83055	4.54328e-101	1.30757e-99	3.15466
CDCA8	3.08083	4.52275	1.78954e-104	5.53859e-103	3.08083
CDH11	1.59725	7.09993	1.87886e-38	1.35608e-37	1.59725
CDH12	-2.24497	-0.765734	4.84707e-22	1.81184e-21	2.24497
CDH18	3.23766	-0.589515	1.79229e-12	4.29411e-12	3.23766
CDH2	2.6202	3.65489	1.08503e-27	5.15774e-27	2.6202
CDH20	-3.23969	-1.08584	6.33008e-155	4.08954e-153	3.23969
CDH23	-1.89755	3.07683	2.04515e-87	4.70004e-86	1.89755
CDH5	-1.58205	5.77862	3.62372e-108	1.19992e-106	1.58205
CDH7	3.51748	1.00967	9.18557e-21	3.23958e-20	3.51748
CDHR2	1.68543	-0.630132	4.25224e-31	2.33975e-30	1.68543
CDHR4	2.33857	-0.386469	2.9508e-13	7.33906e-13	2.33857
CDK1	3.20478	5.5089	4.88377e-119	1.96596e-117	3.20478
CDK5R2	4.87076	-0.323545	1.08802e-19	3.67117e-19	4.87076
CDKN1C	-2.04169	4.17053	7.64236e-121	3.18754e-119	2.04169
CDKN2A	2.81902	4.37591	1.22145e-39	9.17431e-39	2.81902
CDKN3	2.96132	3.3477	5.92221e-112	2.11653e-110	2.96132
CDO1	-3.58108	3.15759	5.12151e-216	6.14482e-214	3.58108
CDSN	2.7799	-0.374819	1.23244e-16	3.63361e-16	2.7799
CDT1	2.54372	4.1204	2.06617e-67	3.30248e-66	2.54372
CDX2	1.96544	-2.95373	6.46658e-06	1.04938e-05	1.96544
CEACAM16	1.87461	-2.75317	1.93067e-08	3.68828e-08	1.87461
CEACAM5	4.42535	5.67001	1.40613e-27	6.65159e-27	4.42535
CEACAM6	4.37431	7.71592	8.51975e-33	5.04873e-32	4.37431
CEACAM7	2.06502	0.147529	1.03638e-13	2.63508e-13	2.06502
CEBPA	-2.15947	4.48077	1.49588e-143	8.58368e-142	2.15947
CELA1	1.51645	-3.76542	5.64883e-10	1.17591e-09	1.51645
CELF2	-1.87328	5.32533	4.86964e-106	1.55132e-104	1.87328
CELF3	4.54973	-0.0970884	1.19462e-30	6.46542e-30	4.54973
CELF4	1.67933	0.876259	3.82041e-13	9.45356e-13	1.67933
CELSR1	1.61028	7.87541	2.24371e-32	1.29919e-31	1.61028
CEMIP	3.23489	4.43667	1.14816e-61	1.59989e-60	3.23489
CEND1	1.81375	-1.77508	5.31572e-26	2.35593e-25	1.81375
CENPA	3.32552	2.9212	2.06281e-87	4.73474e-86	3.32552
CENPE	2.65914	4.33055	1.11095e-86	2.52796e-85	2.65914
CENPF	3.31263	6.82348	7.80348e-113	2.82162e-111	3.31263
CENPI	2.25686	2.64791	5.66762e-74	1.03479e-72	2.25686
CENPK	1.95349	2.50124	7.31634e-73	1.30992e-71	1.95349
CENPM	2.87787	3.16101	1.10386e-94	2.8486e-93	2.87787
CENPU	2.42729	4.64639	2.86914e-94	7.32225e-93	2.42729
CENPW	1.75909	3.52929	7.50539e-30	3.94081e-29	1.75909
CENPX	1.53452	5.43584	9.73921e-50	9.91468e-49	1.53452
CEP112	-1.6871	2.96979	9.49906e-133	4.64323e-131	1.6871
CEP55	3.48134	4.55371	1.4641e-112	5.27331e-111	3.48134
CES1	-3.72763	4.67683	4.29729e-178	3.5928e-176	3.72763
CETP	-2.17627	1.11441	4.3662e-119	1.76145e-117	2.17627
CFAP157	1.50369	2.17964	1.36755e-46	1.27296e-45	1.50369
CFAP45	2.75438	2.61188	2.34391e-61	3.23922e-60	2.75438
CFAP47	3.12144	0.0850164	3.51708e-32	2.02572e-31	3.12144
CFAP65	2.13548	0.0118786	7.69415e-17	2.28487e-16	2.13548
CFAP77	1.72353	-1.42176	7.50948e-12	1.73549e-11	1.72353
CFB	2.60593	5.89808	3.27388e-40	2.50283e-39	2.60593
CFC1	3.7223	-4.00792	7.89345e-11	1.72662e-10	3.7223
CFD	-2.99987	5.80062	1.10795e-108	3.70861e-107	2.99987
CFHR4	3.24368	-3.39943	8.10392e-10	1.67098e-09	3.24368
CFHR5	-1.79383	-3.31113	9.05336e-10	1.86279e-09	1.79383
CFL2	-2.22195	4.51276	6.4689e-293	1.75773e-290	2.22195
CGA	8.7394	4.63091	5.24556e-33	3.14071e-32	8.7394
CGB5	2.37757	-4.06126	5.24896e-06	8.5638e-06	2.37757
CHAC1	1.51148	1.65457	2.10872e-21	7.63379e-21	1.51148
CHAD	1.59154	5.3245	3.54273e-10	7.45548e-10	1.59154
CHEK1	1.59811	4.15702	9.62958e-52	1.03626e-50	1.59811
CHGA	5.04587	6.23359	4.42362e-15	1.20642e-14	5.04587
CHGB	4.74937	6.71354	2.25507e-15	6.24318e-15	4.74937
CHL1	-2.92469	3.84481	1.55292e-118	6.18391e-117	2.92469
CHP2	2.09037	-1.26896	2.7508e-06	4.56704e-06	2.09037
CHRDL1	-4.38957	5.58265	2.41223e-243	3.84231e-241	4.38957
CHRDL2	1.78846	2.17089	6.81822e-10	1.41249e-09	1.78846
CHRNA2	-1.56138	-1.41975	4.90999e-09	9.70391e-09	1.56138
CHRNA4	2.99179	-1.51265	2.01556e-11	4.55083e-11	2.99179
CHRNA6	4.36909	0.230115	8.17292e-62	1.14229e-60	4.36909
CHRNA9	6.77384	2.85195	2.12368e-31	1.18333e-30	6.77384
CHRNB3	2.16656	-4.18191	1.1357e-07	2.06823e-07	2.16656
CHRNB4	1.59559	-1.33845	6.44066e-11	1.4157e-10	1.59559
CHRND	-3.43727	-2.36395	7.93871e-33	4.70894e-32	3.43727
CHRNG	-1.88045	-2.60765	3.11568e-23	1.23194e-22	1.88045
CHST1	2.13143	4.58974	1.06884e-24	4.48941e-24	2.13143
CHST6	2.27785	1.83396	5.93378e-33	3.54129e-32	2.27785
CHST8	1.95711	3.54314	2.17318e-13	5.44311e-13	1.95711
CHST9	-2.31069	2.09919	3.26553e-42	2.67452e-41	2.31069
CHTF18	1.89258	4.46115	8.61774e-58	1.09136e-56	1.89258
CIB3	3.10764	-0.658027	4.46007e-41	3.50825e-40	3.10764
CIDEA	-4.90011	3.37107	1.17856e-163	8.57335e-162	4.90011
CIDEC	-5.23132	5.19585	2.63958e-203	2.73997e-201	5.23132
CILP2	3.51311	4.04168	9.79992e-86	2.18952e-84	3.51311
CITED1	-1.67706	2.62663	3.55066e-19	1.17257e-18	1.67706
CKAP2L	3.38578	3.59777	1.86379e-116	7.14466e-115	3.38578
CKM	-8.48423	5.42371	0	0	8.48423
CKMT1A	1.7465	2.17811	3.70186e-19	1.2212e-18	1.7465
CKMT1B	1.67566	2.37823	8.79217e-17	2.60676e-16	1.67566
CKMT2	-3.63268	1.85319	3.05662e-291	8.06816e-289	3.63268
CKS2	2.70788	5.04553	2.5072e-115	9.45418e-114	2.70788
CLCA1	-1.59395	-4.33031	6.65348e-07	1.15012e-06	1.59395
CLCA4	-3.24171	-0.347529	5.65364e-71	9.64564e-70	3.24171
CLCN1	-2.23587	-1.0584	9.46931e-60	1.25603e-58	2.23587
CLDN14	1.56947	-0.52823	2.50489e-20	8.68508e-20	1.56947
CLDN19	-3.43412	0.56235	2.07416e-86	4.6966e-85	3.43412
CLDN25	3.91545	-2.81764	1.48485e-27	7.00959e-27	3.91545
CLDN5	-2.49962	4.00941	7.82481e-107	2.54093e-105	2.49962
CLDN6	4.8239	1.21623	6.74496e-26	2.9758e-25	4.8239
CLDN8	-2.04105	3.82955	1.05529e-34	6.67988e-34	2.04105
CLDN9	2.74867	0.751867	1.64178e-32	9.57551e-32	2.74867
CLEC11A	1.50398	4.1056	4.3963e-28	2.13091e-27	1.50398
CLEC1A	-1.6035	1.67808	2.56637e-98	7.04588e-97	1.6035
CLEC2A	3.04198	-4.03805	1.91554e-10	4.09884e-10	3.04198
CLEC3A	5.74368	7.72854	7.16704e-19	2.33637e-18	5.74368
CLEC3B	-3.82888	3.91458	0	0	3.82888
CLEC4D	1.61918	-1.6076	1.4041e-08	2.70209e-08	1.61918
CLEC4G	-2.97021	-1.51369	1.24347e-64	1.86945e-63	2.97021
CLEC5A	3.30896	2.74258	3.17508e-77	6.13737e-76	3.30896
CLEC6A	2.77451	-2.54791	1.30082e-19	4.37004e-19	2.77451
CLGN	2.7035	4.33369	4.69189e-33	2.81388e-32	2.7035
CLIC3	1.88288	2.47993	7.99177e-23	3.10023e-22	1.88288
CLIC5	-2.43428	3.27994	7.24339e-135	3.65673e-133	2.43428
CLIC6	2.03149	6.54639	4.37901e-12	1.02479e-11	2.03149
CLIP4	-1.69867	4.39106	9.01554e-65	1.36318e-63	1.69867
CLLU1OS	2.01025	-2.32892	3.90964e-10	8.20611e-10	2.01025
CLMP	-2.37411	5.48868	1.12633e-180	9.77056e-179	2.37411
CLPS	3.04773	-1.24062	5.11366e-27	2.36508e-26	3.04773
CLPSL1	3.0853	1.46189	1.45911e-30	7.86236e-30	3.0853
CLPSL2	3.42302	0.624351	6.1823e-47	5.8103e-46	3.42302
CLRN1	2.74396	-3.45698	2.14157e-15	5.93784e-15	2.74396
CLSPN	2.9159	3.01154	9.34877e-81	1.92144e-79	2.9159
CLVS2	3.39181	0.966059	5.57799e-10	1.16168e-09	3.39181
CMA1	-2.86128	0.0422271	6.22615e-84	1.34236e-82	2.86128
CMYA5	-2.7406	5.76912	1.88293e-128	8.69774e-127	2.7406
CNGA2	5.42427	-1.3198	4.03893e-21	1.44347e-20	5.42427
CNGA3	2.22497	0.148875	6.28235e-14	1.61467e-13	2.22497
CNIH2	3.39666	2.3009	4.04526e-80	8.17771e-79	3.39666
CNKSR2	-2.06584	0.860774	2.41285e-58	3.08955e-57	2.06584
CNN1	-3.08003	5.24866	6.59385e-175	5.36716e-173	3.08003
CNPY1	1.56784	-3.7306	0.000218294	0.000320062	1.56784
CNRIP1	-1.72447	3.39653	7.7383e-125	3.39621e-123	1.72447
CNTD2	3.09423	3.02064	3.32612e-45	2.97179e-44	3.09423
CNTFR	-2.59644	3.18409	1.49365e-56	1.82891e-55	2.59644
CNTN5	2.12196	-0.614743	1.1782e-08	2.27862e-08	2.12196
CNTNAP2	4.02747	5.27676	7.96831e-40	6.02169e-39	4.02747
CNTNAP3	-2.25921	0.991106	2.80948e-58	3.59244e-57	2.25921
CNTNAP3B	-2.68391	0.0286135	3.96255e-92	9.74915e-91	2.68391
COL10A1	7.17296	7.21463	6.95597e-166	5.20346e-164	7.17296
COL11A1	6.22291	7.69693	2.91796e-108	9.67956e-107	6.22291
COL11A2	2.3293	3.12116	3.91448e-14	1.01656e-13	2.3293
COL12A1	1.54657	9.21162	3.20358e-28	1.56181e-27	1.54657
COL14A1	-1.53368	7.04289	1.2476e-34	7.881e-34	1.53368
COL1A1	2.31574	12.7415	8.2581e-50	8.41152e-49	2.31574
COL1A2	1.63176	12.283	7.68461e-30	4.03377e-29	1.63176
COL20A1	1.80985	-2.75294	1.75854e-10	3.77469e-10	1.80985
COL22A1	3.11121	3.14163	7.80917e-36	5.15322e-35	3.11121
COL25A1	-2.46736	0.39157	7.49293e-79	1.48548e-77	2.46736
COL2A1	3.41371	6.22983	9.72814e-17	2.87871e-16	3.41371
COL5A1	1.97409	8.96082	5.69677e-47	5.36489e-46	1.97409
COL5A2	1.80085	9.03459	1.33162e-39	9.99366e-39	1.80085
COL6A5	2.55232	-1.6928	1.93014e-17	5.90647e-17	2.55232
COL6A6	-3.16441	2.33516	1.03083e-144	6.02743e-143	3.16441
COL9A1	3.75012	1.66322	6.1203e-16	1.74379e-15	3.75012
COL9A3	2.47276	4.02371	1.93586e-18	6.19911e-18	2.47276
COMMD3-BMI1	1.90114	-3.06995	7.03269e-13	1.7211e-12	1.90114
COMP	4.55606	7.04977	3.41975e-84	7.41628e-83	4.55606
COMTD1	1.78721	3.41064	4.97227e-38	3.53084e-37	1.78721
CORIN	1.93488	2.72707	9.94122e-29	4.95907e-28	1.93488
CORO2B	-2.29201	2.32853	8.90935e-160	6.14246e-158	2.29201
COX6A2	-6.37246	0.429156	1.55193e-230	2.13993e-228	6.37246
COX6C	2.84686	9.21156	2.73404e-53	3.05238e-52	2.84686
COX7A1	-2.46784	3.40242	8.20063e-124	3.56525e-122	2.46784
COX7B2	6.50638	-2.01132	1.89406e-15	5.26739e-15	6.50638
CPA1	-4.0859	-1.45355	1.34706e-153	8.46586e-152	4.0859
CPA2	-2.33469	-2.52072	1.49286e-44	1.3048e-43	2.33469
CPA6	2.08944	1.78121	3.32332e-10	7.00491e-10	2.08944
CPB1	4.83217	10.6758	2.10721e-17	6.43979e-17	4.83217
CPED1	-2.85171	4.25477	3.02984e-184	2.73084e-182	2.85171
CPLX2	6.42537	3.14241	1.64971e-17	5.06594e-17	6.42537
CPM	-2.01444	5.36783	1.15143e-105	3.63676e-104	2.01444
CPN1	3.06258	-3.91759	1.50689e-07	2.72142e-07	3.06258
CPNE7	2.65867	3.29963	2.91178e-37	2.01728e-36	2.65867
CRABP2	2.21058	9.08182	2.8423e-39	2.1065e-38	2.21058
CRB2	-2.05057	-0.0829268	1.22231e-70	2.06819e-69	2.05057
CRB3	1.65966	3.94716	4.13186e-69	6.87169e-68	1.65966
CRCT1	5.93652	-1.90196	3.90524e-13	9.6583e-13	5.93652
CREB3L1	2.36386	6.25899	4.84396e-51	5.12611e-50	2.36386
CREB3L3	3.34342	-1.87834	2.10989e-18	6.73888e-18	3.34342
CREB3L4	1.74076	7.02411	1.81742e-49	1.83701e-48	1.74076
CREB5	-2.00229	3.19739	6.06991e-96	1.6022e-94	2.00229
CREG2	1.52106	-0.83854	6.29149e-21	2.23769e-20	1.52106
CRHBP	-3.82488	0.14437	0	0	3.82488
CRHR2	-1.57614	-1.57483	4.36704e-44	3.76001e-43	1.57614
CRIM1	-1.63189	7.22578	5.22559e-98	1.4283e-96	1.63189
CRIP1	1.60544	3.14506	1.78789e-26	8.0849e-26	1.60544
CRISP1	3.37759	-2.79584	3.51238e-13	8.70767e-13	3.37759
CRISP3	4.07611	6.10303	1.3883e-16	4.08334e-16	4.07611
CRNN	4.00647	-2.03091	4.46053e-08	8.33424e-08	4.00647
CROCC2	2.18087	-0.999769	2.20748e-12	5.26359e-12	2.18087
CRP	6.41234	1.8577	3.38523e-18	1.07031e-17	6.41234
CRYAB	-2.79095	6.97598	2.49425e-81	5.16663e-80	2.79095
CRYBA2	4.766	-1.52035	3.20389e-25	1.37702e-24	4.766
CRYBG3	-1.83101	4.36805	6.46387e-66	1.00533e-64	1.83101
CSAG1	8.30554	0.454708	9.60778e-34	5.87047e-33	8.30554
CSF3	-3.61726	-1.0103	4.70989e-64	7.01245e-63	3.61726
CSH2	3.87252	-3.90758	9.31603e-12	2.14068e-11	3.87252
CSMD2	2.14678	1.93374	4.92043e-39	3.61203e-38	2.14678
CSMD3	4.84365	1.28651	1.08909e-16	3.2166e-16	4.84365
CSRNP1	-1.82636	5.67942	7.5901e-140	4.12477e-138	1.82636
CSRNP3	-2.31834	2.13937	5.21288e-99	1.44622e-97	2.31834
CSRP3	-7.30065	1.89813	6.69886e-106	2.12672e-104	7.30065
CST1	6.97806	3.65371	1.63865e-68	2.66996e-67	6.97806
CST11	2.16678	-3.54387	1.19656e-07	2.1752e-07	2.16678
CST2	5.29668	1.89613	5.62645e-58	7.15484e-57	5.29668
CST4	8.36581	2.42577	2.47473e-51	2.64158e-50	8.36581
CST5	7.93653	3.59261	2.42352e-27	1.13452e-26	7.93653
CST6	2.7071	2.05297	7.41653e-31	4.0519e-30	2.7071
CST9	2.64303	3.85806	1.12252e-08	2.17362e-08	2.64303
CST9L	3.19491	-1.21776	3.15251e-12	7.44777e-12	3.19491
CSTL1	3.15333	-3.0535	1.87064e-18	5.99546e-18	3.15333
CT45A1	5.73164	-2.28663	4.7478e-11	1.05148e-10	5.73164
CT45A10	5.17687	-2.93138	2.69523e-12	6.3895e-12	5.17687
CT83	4.74762	0.40179	1.69165e-09	3.42989e-09	4.74762
CTAG2	2.47932	-0.909216	0.000307663	0.000445648	2.47932
CTHRC1	2.47346	6.54475	1.83311e-80	3.74259e-79	2.47346
CTNNA2	3.28366	0.192534	1.64612e-15	4.59448e-15	3.28366
CTNNA3	-2.48297	-0.269869	1.8442e-79	3.68382e-78	2.48297
CTSE	2.30671	-0.297069	5.00761e-09	9.89262e-09	2.30671
CTSG	-1.73398	1.35245	1.97767e-28	9.74439e-28	1.73398
CTXN1	2.93968	4.66784	3.44444e-81	7.11095e-80	2.93968
CTXN2	2.12403	-3.92736	1.61908e-15	4.52036e-15	2.12403
CUBN	-1.50991	1.47506	5.54682e-67	8.82002e-66	1.50991
CWH43	1.96551	0.574403	3.91433e-09	7.78442e-09	1.96551
CX3CL1	-2.32653	6.61212	1.36197e-92	3.37787e-91	2.32653
CXCL10	3.64689	5.74876	9.16445e-54	1.04204e-52	3.64689
CXCL11	3.7865	3.85154	3.19443e-55	3.78113e-54	3.7865
CXCL12	-1.85994	7.24781	3.56755e-104	1.0968e-102	1.85994
CXCL13	1.71381	5.76023	3.2696e-08	6.15636e-08	1.71381
CXCL17	2.71612	4.77027	4.58668e-17	1.37712e-16	2.71612
CXCL2	-3.36393	2.32538	3.77766e-136	1.95518e-134	3.36393
CXCL3	-1.85269	-0.67169	2.28328e-37	1.5914e-36	1.85269
CXCL9	3.21385	6.69679	6.79137e-38	4.79496e-37	3.21385
CXCR2	-1.92314	-0.593133	6.69212e-68	1.08086e-66	1.92314
CXCR3	1.69305	2.25999	1.03382e-21	3.80439e-21	1.69305
CXCR5	1.94526	-1.95804	1.27291e-14	3.38948e-14	1.94526
CXorf36	-1.98959	4.71089	3.29262e-169	2.52439e-167	1.98959
CXorf67	3.66628	-1.44232	1.8659e-11	4.21985e-11	3.66628
CYP19A1	2.72187	2.08524	2.63441e-14	6.90734e-14	2.72187
CYP1A1	-3.54042	-0.383585	5.44103e-61	7.44144e-60	3.54042
CYP1A2	-2.16638	-4.1689	6.8023e-31	3.72403e-30	2.16638
CYP21A2	2.38635	1.63306	3.42556e-29	1.74556e-28	2.38635
CYP26B1	-2.07303	2.98074	2.12171e-74	3.90855e-73	2.07303
CYP27B1	1.59386	2.11098	7.04226e-24	2.86734e-23	1.59386
CYP2A13	3.45034	-1.20911	2.17278e-12	5.18151e-12	3.45034
CYP2A6	3.58536	5.66854	1.47711e-13	3.7295e-13	3.58536
CYP2A7	5.28056	4.44965	2.10186e-18	6.7144e-18	5.28056
CYP2B6	1.50124	-1.40656	8.07165e-06	1.30253e-05	1.50124
CYP2F1	3.44223	-1.87899	9.69825e-16	2.73663e-15	3.44223
CYP2W1	2.6102	-2.15664	2.0096e-15	5.57863e-15	2.6102
CYP3A4	-1.85206	-2.51005	2.55059e-37	1.77237e-36	1.85206
CYP4F2	1.84427	-1.62617	6.76792e-07	1.16881e-06	1.84427
CYP7A1	-1.62009	-3.3806	3.79572e-34	2.3614e-33	1.62009
CYR61	-1.54698	7.87076	2.03696e-51	2.17932e-50	1.54698
CYSRT1	2.34822	1.26872	6.28778e-50	6.4401e-49	2.34822
CYYR1	-1.7625	4.63298	3.38892e-91	8.19594e-90	1.7625
DAAM2	-1.72992	4.44202	3.00548e-88	7.00281e-87	1.72992
DACT2	-2.95778	-0.0249628	3.99532e-74	7.3163e-73	2.95778
DAZL	1.82471	-2.538	3.14395e-09	6.28483e-09	1.82471
DBNDD1	1.94919	5.47725	2.5185e-56	3.06753e-55	1.94919
DBX2	-1.98203	-1.48298	2.9646e-46	2.71711e-45	1.98203
DCAF12L1	2.22869	-1.74491	5.3523e-05	8.16635e-05	2.22869
DCAF4L2	5.57569	-1.41096	2.00732e-11	4.53359e-11	5.57569
DCAF8L1	2.49624	-4.3022	1.57637e-06	2.65996e-06	2.49624
DCAF8L2	4.56765	-3.02382	7.48315e-13	1.82892e-12	4.56765
DCD	5.16333	6.32606	1.58447e-11	3.59969e-11	5.16333
DCDC2C	-1.71899	-4.27386	5.27034e-16	1.5065e-15	1.71899
DCDC5	1.8769	2.08142	2.59029e-18	8.24193e-18	1.8769
DCN	-1.93776	9.63152	1.14457e-83	2.45909e-82	1.93776
DCT	-2.46523	-0.390432	1.60503e-40	1.23877e-39	2.46523
DDC	1.56526	0.816656	1.06417e-05	1.70476e-05	1.56526
DDIAS	1.7587	3.11976	2.89491e-49	2.90545e-48	1.7587
DDIT4L	-1.60408	1.68736	2.46946e-31	1.37269e-30	1.60408
DDN	1.53291	-0.625491	4.27995e-11	9.49805e-11	1.53291
DDR2	-2.62728	6.25473	5.80364e-228	7.71467e-226	2.62728
DDX39A	1.56123	6.033	2.2685e-68	3.68647e-67	1.56123
DDX53	3.17879	-3.38556	5.2385e-08	9.7425e-08	3.17879
DEFB126	3.62181	-3.62342	7.10226e-10	1.46903e-09	3.62181
DEFB132	-4.83534	1.03971	7.7096e-201	7.70001e-199	4.83534
DEFB4A	3.59756	-4.00288	1.23947e-08	2.39356e-08	3.59756
DEGS2	2.59003	6.23834	6.13528e-38	4.34003e-37	2.59003
DENND2A	-2.122	2.71561	3.0987e-135	1.57293e-133	2.122
DEPDC1	3.30195	3.76688	2.79846e-87	6.40732e-86	3.30195
DEPDC1B	2.99162	2.66317	1.34827e-95	3.5286e-94	2.99162
DES	-4.92644	4.95473	1.16286e-151	7.16205e-150	4.92644
DGAT2	-3.27695	6.03439	5.39241e-183	4.83668e-181	3.27695
DHDH	1.52389	0.0318491	7.29304e-21	2.58297e-20	1.52389
DHRS7C	-7.56071	-2.3478	2.06007e-229	2.75825e-227	7.56071
DIAPH3	2.33436	3.50654	1.51599e-63	2.2284e-62	2.33436
DIO1	3.58023	3.61027	9.14595e-29	4.56852e-28	3.58023
DISP3	2.29822	0.890408	7.98985e-25	3.37591e-24	2.29822
DKK1	2.18913	2.68531	1.44467e-13	3.64911e-13	2.18913
DLC1	-1.72909	5.76784	1.96381e-103	5.9484e-102	1.72909
DLGAP3	1.62196	0.134851	6.16767e-19	2.01556e-18	1.62196
DLGAP5	3.34893	4.1451	1.77159e-108	5.89795e-107	3.34893
DLK2	-1.65063	1.19774	1.52102e-77	2.95209e-76	1.65063
DLL3	2.79944	-0.513224	2.30857e-21	8.33277e-21	2.79944
DLX1	1.56741	1.93993	5.65967e-07	9.83853e-07	1.56741
DLX2	2.17399	1.73522	9.11452e-12	2.09646e-11	2.17399
DLX3	1.57831	2.37892	1.39931e-17	4.31132e-17	1.57831
DLX4	2.10759	0.968139	3.55435e-30	1.88935e-29	2.10759
DLX5	2.583	1.39148	4.62823e-27	2.14864e-26	2.583
DLX6	2.41116	-0.480261	3.24969e-12	7.67244e-12	2.41116
DMBT1	2.12925	2.59398	8.83377e-08	1.61862e-07	2.12925
DMBX1	3.19601	-0.436809	2.8128e-37	1.9509e-36	3.19601
DMD	-2.97085	4.80195	1.15935e-175	9.47842e-174	2.97085
DMGDH	-2.72282	1.11504	2.19732e-231	3.05263e-229	2.72282
DMP1	4.96186	-0.977093	4.51534e-32	2.58457e-31	4.96186
DMRT1	3.57128	-1.98644	2.39688e-14	6.29616e-14	3.57128
DMRT2	-2.75619	0.334544	2.92262e-113	1.06722e-111	2.75619
DMRTA2	3.09133	-1.98248	6.16035e-14	1.58442e-13	3.09133
DMRTC2	2.70886	-1.29841	3.92704e-11	8.72533e-11	2.70886
DNA2	1.75546	3.31199	2.73789e-65	4.20515e-64	1.75546
DNAAF3	2.49496	1.94675	5.06859e-40	3.84926e-39	2.49496
DNAH11	1.96561	1.47331	1.16673e-14	3.11483e-14	1.96561
DNAH14	1.65233	3.77574	2.50034e-64	3.73776e-63	1.65233
DNAH3	1.50587	0.114178	2.0227e-11	4.5661e-11	1.50587
DNAH8	1.87535	-1.49605	1.92181e-18	6.15624e-18	1.87535
DNAH9	-1.52526	0.164289	5.23797e-22	1.9548e-21	1.52526
DNAJC1	1.59641	6.53768	6.47665e-41	5.05146e-40	1.59641
DNAJC12	2.13592	5.49855	4.57183e-24	1.87345e-23	2.13592
DNAJC22	1.55243	4.17954	3.31734e-20	1.14526e-19	1.55243
DNASE1L2	2.37175	0.655985	6.20132e-48	6.01795e-47	2.37175
DNASE1L3	-2.69067	0.976672	2.70077e-103	8.16729e-102	2.69067
DNMT3B	1.55552	3.2489	1.1801e-37	8.26873e-37	1.55552
DOC2A	1.63669	2.22997	5.71578e-19	1.87054e-18	1.63669
DOCK11	-2.30005	4.75233	3.18523e-172	2.5151e-170	2.30005
DOK7	2.34995	3.31117	1.51892e-23	6.09448e-23	2.34995
DPEP1	2.50936	0.661157	1.14292e-45	1.03569e-44	2.50936
DPP10	1.59931	-0.188198	4.59444e-05	7.03443e-05	1.59931
DPP3	1.57741	6.05987	7.28953e-82	1.52535e-80	1.57741
DPP6	-2.63211	-0.156079	4.83855e-50	4.97783e-49	2.63211
DPPA2	3.29148	-3.86949	8.36716e-08	1.53602e-07	3.29148
DPT	-3.45852	6.21668	6.46942e-219	8.02252e-217	3.45852
DPYSL5	4.46471	1.09272	3.49324e-18	1.10333e-17	4.46471
DQX1	3.94591	1.22015	9.38375e-51	9.82344e-50	3.94591
DRC7	2.49541	-1.59702	2.87676e-21	1.03412e-20	2.49541
DRD4	1.50892	-0.200628	1.03704e-24	4.36179e-24	1.50892
DRP2	1.76517	0.258038	1.44367e-36	9.73531e-36	1.76517
DSC1	-2.57461	-0.321396	3.99094e-82	8.38916e-81	2.57461
DSCC1	1.55805	3.48912	3.04416e-39	2.25348e-38	1.55805
DSCR4	3.99947	-3.69906	4.50434e-10	9.42118e-10	3.99947
DSCR8	5.94547	-0.648654	2.33611e-23	9.29464e-23	5.94547
DSG4	-1.5213	-3.39666	5.85073e-16	1.66827e-15	1.5213
DSPP	3.04651	-3.59207	1.92041e-14	5.07485e-14	3.04651
DST	-2.33765	8.10763	6.97478e-178	5.80509e-176	2.33765
DTL	3.10302	4.91041	2.50389e-118	9.90671e-117	3.10302
DTX1	-2.40497	3.03109	3.38891e-160	2.3629e-158	2.40497
DUPD1	-4.63505	-3.40763	1.55943e-119	6.34661e-118	4.63505
DUSP1	-1.94685	7.66035	2.56146e-80	5.2181e-79	1.94685
DUSP13	-2.09632	0.158325	2.56409e-22	9.71828e-22	2.09632
DUSP26	-3.45959	-0.223557	4.52067e-96	1.19668e-94	3.45959
DUSP27	-3.02613	-0.131937	1.80143e-95	4.69463e-94	3.02613
DYDC1	3.06164	-3.14756	7.14555e-20	2.42967e-19	3.06164
DYDC2	2.19057	0.201574	1.97109e-23	7.87796e-23	2.19057
DYNAP	1.61643	-3.90343	0.000103156	0.000154533	1.61643
E2F1	2.70533	4.52019	4.59224e-85	1.01013e-83	2.70533
E2F2	2.6322	3.41909	2.57069e-66	4.04933e-65	2.6322
E2F7	2.93598	2.47371	1.51391e-74	2.80848e-73	2.93598
E2F8	2.62294	2.7085	1.63451e-53	1.83816e-52	2.62294
EBF1	-3.01096	4.30888	9.12087e-304	2.76273e-301	3.01096
EBF2	-2.2176	2.4193	2.08128e-128	9.58998e-127	2.2176
EBF3	-2.69401	2.72384	4.25063e-197	4.11198e-195	2.69401
EBLN1	3.43278	-2.85191	2.38541e-11	5.36391e-11	3.43278
ECE2	2.00837	3.74617	2.22847e-61	3.082e-60	2.00837
ECEL1	2.10982	3.20798	2.87238e-10	6.07521e-10	2.10982
ECM1	1.80715	7.10778	1.81627e-19	6.05652e-19	1.80715
ECM2	-2.55919	5.08203	8.1716e-179	6.95791e-177	2.55919
ECSCR	-1.69774	2.01795	1.15232e-96	3.09467e-95	1.69774
ECT2	1.93606	5.84775	7.15661e-85	1.56674e-83	1.93606
EDAR	-1.54825	-0.686143	5.51467e-14	1.42231e-13	1.54825
EDDM3B	2.536	-1.28175	1.85601e-10	3.97606e-10	2.536
EDN2	2.58501	2.8885	1.74278e-34	1.09715e-33	2.58501
EDN3	-2.36412	1.76191	3.06799e-23	1.21386e-22	2.36412
EDNRB	-2.11089	3.8717	2.24393e-120	9.3171e-119	2.11089
EEPD1	-1.65578	3.74448	9.32196e-141	5.15694e-139	1.65578
EFCAB1	-2.29885	0.362658	1.56859e-51	1.68114e-50	2.29885
EFCAB3	2.44108	-3.18723	2.61272e-08	4.95233e-08	2.44108
EFEMP1	-1.86833	7.03852	1.86247e-63	2.73118e-62	1.86833
EFNA2	3.44576	-2.73061	9.34153e-24	3.78102e-23	3.44576
EFNA3	1.97686	4.07606	2.42707e-37	1.68844e-36	1.97686
EGFL6	-1.93824	2.88676	1.12773e-43	9.65123e-43	1.93824
EGFLAM	-1.7061	3.75985	3.33007e-117	1.29264e-115	1.7061
EGLN3	1.66498	5.5731	1.09524e-25	4.7796e-25	1.66498
EGR1	-2.62585	8.55537	9.04045e-122	3.82244e-120	2.62585
EGR2	-2.13731	4.8551	1.1162e-91	2.72805e-90	2.13731
EGR3	-2.05278	5.32804	1.22326e-54	1.42961e-53	2.05278
EGR4	1.58244	-1.25578	1.8583e-08	3.55332e-08	1.58244
EHD2	-1.89325	6.97844	1.81686e-153	1.13797e-151	1.89325
EIF4E1B	4.44894	-1.29702	1.04229e-19	3.52202e-19	4.44894
ELANE	-2.33259	-2.43882	4.47171e-49	4.46133e-48	2.33259
ELAVL2	2.66394	1.77042	5.23159e-34	3.23725e-33	2.66394
ELAVL3	3.30827	-0.76567	2.20776e-15	6.11677e-15	3.30827
ELFN2	2.87482	0.658442	4.05016e-23	1.59325e-22	2.87482
ELOVL2	1.74428	5.44051	1.24679e-12	3.00822e-12	1.74428
ELOVL3	-1.76685	0.120073	8.75987e-36	5.77851e-35	1.76685
ELSPBP1	2.91717	-4.14604	3.04482e-08	5.74365e-08	2.91717
EMCN	-1.87402	4.42183	1.98456e-114	7.36321e-113	1.87402
EME1	2.66774	2.42762	9.66089e-78	1.88296e-76	2.66774
EME2	1.52958	4.2003	7.5326e-37	5.1529e-36	1.52958
EMILIN3	-1.50335	1.03333	5.65142e-14	1.45697e-13	1.50335
EMP1	-1.82664	7.81552	1.04619e-119	4.28613e-118	1.82664
EMX1	3.655	1.3943	1.42778e-30	7.69803e-30	3.655
EN1	2.28595	3.91319	3.5663e-16	1.02799e-15	2.28595
ENAM	-2.36648	-2.55255	4.3124e-59	5.6192e-58	2.36648
ENKUR	1.63864	-0.386157	9.16709e-21	3.23368e-20	1.63864
ENO2	1.58675	5.62022	1.97271e-29	1.01645e-28	1.58675
ENO3	-4.53006	4.01679	0	0	4.53006
ENPP2	-2.67281	5.60735	5.26713e-163	3.80159e-161	2.67281
ENPP7	1.84827	-3.32156	2.92282e-13	7.27046e-13	1.84827
ENTHD1	2.87182	-1.31875	5.85994e-41	4.584e-40	2.87182
ENTPD8	2.75251	2.05044	2.89889e-31	1.60704e-30	2.75251
EPAS1	-1.90163	7.61962	3.68842e-169	2.81616e-167	1.90163
EPB41L2	-1.61712	6.31661	1.45782e-104	4.51947e-103	1.61712
EPB42	-3.51437	-0.945969	2.74215e-227	3.61905e-225	3.51437
EPDR1	-1.77502	3.83782	5.88376e-84	1.27003e-82	1.77502
EPHA8	3.71035	0.392689	8.28659e-28	3.9697e-27	3.71035
EPHB1	-2.17314	2.62	1.11348e-65	1.7231e-64	2.17314
EPN3	2.25868	5.58005	3.09158e-52	3.36216e-51	2.25868
EPO	3.95887	0.0447807	1.07342e-28	5.34021e-28	3.95887
EPYC	6.05851	2.00334	1.21827e-67	1.96079e-66	6.05851
ERBB2	1.97876	9.7398	1.30065e-24	5.4408e-24	1.97876
ERCC6L	2.89908	2.80516	3.38265e-104	1.04169e-102	2.89908
ERFE	1.94044	-0.442547	7.49521e-25	3.17344e-24	1.94044
ERG	-1.61309	4.22217	1.82428e-111	6.42041e-110	1.61309
ERICH1-AS1	-2.00852	-1.71447	9.18829e-59	1.18971e-57	2.00852
ERICH4	-2.64397	-3.57148	8.8881e-101	2.54613e-99	2.64397
ERMN	2.59585	1.021	4.59221e-41	3.60758e-40	2.59585
ERP27	1.65579	4.40052	6.02816e-21	2.14568e-20	1.65579
ERVV-1	3.21599	-2.01031	9.97346e-17	2.94942e-16	3.21599
ERVV-2	5.17736	-1.6938	1.67154e-21	6.08094e-21	5.17736
ESCO2	2.75999	2.91261	5.50355e-91	1.32927e-89	2.75999
ESM1	2.99969	3.40118	1.57433e-87	3.62705e-86	2.99969
ESPL1	2.78964	4.22043	2.0276e-94	5.19612e-93	2.78964
ESPN	1.88865	4.6435	6.11819e-29	3.08447e-28	1.88865
ESR1	1.76106	8.99225	1.18209e-15	3.32796e-15	1.76106
ESR2	-2.00233	-0.233015	9.89942e-107	3.19217e-105	2.00233
ESRP1	1.68152	7.34868	5.62586e-66	8.76468e-65	1.68152
ESX1	2.73217	-3.36325	3.16006e-06	5.22257e-06	2.73217
ETNK2	1.54219	5.72852	3.38719e-27	1.58043e-26	1.54219
ETV7	2.05283	2.79411	3.44379e-39	2.5432e-38	2.05283
EVA1B	1.59378	4.70271	6.67314e-24	2.71884e-23	1.59378
EVL	1.5648	8.08928	6.72328e-32	3.81764e-31	1.5648
EVPL	1.74163	5.77388	4.32005e-54	4.96402e-53	1.74163
EVX1	1.53707	-2.08937	2.91291e-07	5.16475e-07	1.53707
EXO1	3.48845	3.83639	1.06991e-103	3.26218e-102	3.48845
EXOC3L4	1.71947	0.0202975	2.67267e-17	8.11419e-17	1.71947
EZH2	2.35962	4.71286	4.33707e-100	1.2272e-98	2.35962
F10	-2.48865	1.60778	2.04382e-155	1.32971e-153	2.48865
F12	2.93738	3.18354	1.1947e-65	1.84724e-64	2.93738
F13B	2.24976	-4.25798	7.45129e-11	1.63222e-10	2.24976
F2	4.02094	-1.92709	4.24081e-22	1.59102e-21	4.02094
F2RL2	1.76978	4.93708	8.40498e-24	3.40717e-23	1.76978
F3	-1.63854	4.97504	1.46373e-46	1.36043e-45	1.63854
F7	2.86637	3.06056	5.24596e-29	2.65415e-28	2.86637
F8	-1.6916	4.5307	2.55771e-140	1.40234e-138	1.6916
F9	2.50049	-3.46314	4.79677e-05	7.33874e-05	2.50049
FABP1	2.52989	-1.79109	3.86431e-06	6.35409e-06	2.52989
FABP4	-4.84136	7.6965	1.01067e-203	1.06103e-201	4.84136
FABP6	4.34647	0.0556817	4.017e-28	1.95167e-27	4.34647
FABP7	1.64549	5.45094	0.000181998	0.000268164	1.64549
FABP9	-2.80719	-4.20323	3.03637e-24	1.2523e-23	2.80719
FADS2	1.67081	7.56637	3.48134e-17	1.05209e-16	1.67081
FADS6	3.26104	-1.59631	8.6816e-17	2.5748e-16	3.26104
FAM107A	-2.59206	3.94624	2.59498e-77	5.02594e-76	2.59206
FAM110A	1.55654	5.15512	5.94672e-56	7.17216e-55	1.55654
FAM110D	-2.0006	1.4935	6.47891e-86	1.4528e-84	2.0006
FAM111B	2.86085	4.64538	8.64412e-75	1.61005e-73	2.86085
FAM126A	-1.84879	4.49285	6.06662e-112	2.15979e-110	1.84879
FAM135B	2.62807	1.69601	1.30784e-16	3.85037e-16	2.62807
FAM13A	-2.41063	4.78663	1.07581e-273	2.45404e-271	2.41063
FAM13C	-2.20348	1.66486	1.0752e-128	5.00417e-127	2.20348
FAM149A	-2.08752	2.06255	1.6855e-127	7.6707e-126	2.08752
FAM150A	2.40605	-3.07849	2.28358e-06	3.81119e-06	2.40605
FAM155B	1.67647	2.08312	3.36033e-22	1.26686e-21	1.67647
FAM162B	-2.08344	-0.132929	5.17788e-118	2.03557e-116	2.08344
FAM163B	2.65544	-3.12376	6.51271e-13	1.59659e-12	2.65544
FAM166B	-1.83838	0.469726	2.41269e-39	1.79321e-38	1.83838
FAM173A	1.85239	3.85979	6.68038e-45	5.90308e-44	1.85239
FAM177B	1.8964	0.653178	8.6563e-15	2.32779e-14	1.8964
FAM180B	-3.9455	-0.758452	1.49224e-172	1.18335e-170	3.9455
FAM181A	-1.88318	-3.80516	1.08519e-19	3.6623e-19	1.88318
FAM183A	1.59231	0.484678	2.66673e-18	8.4793e-18	1.59231
FAM189A1	1.71076	0.771771	7.94214e-14	2.03026e-13	1.71076
FAM189A2	-2.0821	4.0521	1.46347e-64	2.19307e-63	2.0821
FAM196A	3.76327	3.80548	1.32038e-30	7.13563e-30	3.76327
FAM196B	-3.76501	0.6708	6.43189e-142	3.61222e-140	3.76501
FAM216B	2.89742	-2.38831	1.89987e-15	5.28275e-15	2.89742
FAM228A	-2.62657	-1.90094	1.48814e-138	7.87862e-137	2.62657
FAM234B	1.71007	6.75888	3.06808e-21	1.10182e-20	1.71007
FAM25A	4.35305	-0.926473	9.31733e-18	2.89338e-17	4.35305
FAM47E-STBD1	-2.14063	-2.41662	5.16951e-77	9.90841e-76	2.14063
FAM49A	-1.54275	4.01444	2.84158e-88	6.62928e-87	1.54275
FAM57B	2.91339	1.22674	1.55835e-39	1.16715e-38	2.91339
FAM64A	3.1007	2.89899	1.85807e-82	3.92809e-81	3.1007
FAM71C	2.23765	-3.1468	2.19229e-11	4.93986e-11	2.23765
FAM71E2	1.94723	-4.06982	3.61347e-07	6.3696e-07	1.94723
FAM71F1	2.04639	-2.2024	5.63353e-20	1.92508e-19	2.04639
FAM72A	2.45289	0.547639	1.14243e-64	1.72034e-63	2.45289
FAM72B	2.38403	0.356431	1.0706e-52	1.17676e-51	2.38403
FAM72C	2.74446	-1.5194	4.40347e-39	3.24026e-38	2.74446
FAM72D	2.98468	-0.498235	5.00444e-62	7.06935e-61	2.98468
FAM83A	2.93317	3.06184	8.5296e-21	3.01053e-20	2.93317
FAM83C	2.42495	-1.43674	6.55606e-06	1.06353e-05	2.42495
FAM83D	3.55479	4.23836	3.2345e-94	8.23194e-93	3.55479
FAM83E	1.97909	3.69099	3.46448e-18	1.09462e-17	1.97909
FAM83H	1.84887	7.25279	8.47486e-81	1.74376e-79	1.84887
FAM92B	1.8661	-1.3394	5.02262e-14	1.29831e-13	1.8661
FAM9A	2.63985	-4.18606	2.65619e-07	4.7259e-07	2.63985
FAM9C	3.33151	-0.428344	1.7258e-10	3.70699e-10	3.33151
FANCA	1.96155	3.58338	1.84497e-54	2.14264e-53	1.96155
FANCD2	1.52717	4.61287	7.2478e-65	1.09949e-63	1.52717
FANCI	2.02259	5.5705	4.79788e-90	1.14535e-88	2.02259
FAP	1.68595	5.47066	2.04723e-38	1.4753e-37	1.68595
FAT2	-2.1485	4.07568	1.61353e-42	1.33273e-41	2.1485
FAT4	-1.69938	3.8855	1.28687e-61	1.79047e-60	1.69938
FAXDC2	-1.88074	5.06156	6.86033e-60	9.12587e-59	1.88074
FBLN5	-1.75733	6.03436	4.05993e-79	8.08354e-78	1.75733
FBN2	3.11319	3.69078	1.04277e-44	9.16616e-44	3.11319
FBN3	1.7093	1.78217	1.85654e-09	3.75268e-09	1.7093
FBP2	-5.25065	-0.249485	2.82258e-283	6.86222e-281	5.25065
FBXL16	2.09114	5.09506	2.87712e-34	1.80083e-33	2.09114
FBXL6	1.83859	4.79323	1.05913e-68	1.73643e-67	1.83859
FBXO40	-6.03492	-0.422883	7.63023e-169	5.8018e-167	6.03492
FBXO43	2.44635	0.292926	1.3582e-70	2.29392e-69	2.44635
FCAMR	2.42919	-1.09861	3.69402e-11	8.21848e-11	2.42919
FCGR1A	1.7366	2.46526	9.35215e-49	9.25547e-48	1.7366
FCRL3	1.57833	1.39683	2.9765e-12	7.04276e-12	1.57833
FCRL4	2.36138	-2.34549	5.11619e-20	1.75254e-19	2.36138
FCRLB	3.23643	2.93497	7.36833e-29	3.69556e-28	3.23643
FDCSP	2.43143	7.20741	1.0384e-07	1.89459e-07	2.43143
FEN1	1.68405	5.37782	1.65758e-74	3.06271e-73	1.68405
FER1L6	1.92784	-1.31346	3.91359e-14	1.01647e-13	1.92784
FERMT2	-1.89527	5.98855	9.61119e-170	7.46159e-168	1.89527
FEZF1	2.55217	-2.99685	2.7547e-10	5.83299e-10	2.55217
FEZF2	-2.54938	-3.46011	4.2935e-19	1.41158e-18	2.54938
FFAR3	-2.11418	-3.35865	4.60718e-48	4.49455e-47	2.11418
FFAR4	-1.98046	0.961124	1.42906e-112	5.15718e-111	1.98046
FGA	4.00086	3.50658	2.88771e-07	5.12302e-07	4.00086
FGB	3.30394	4.31355	6.24394e-08	1.15693e-07	3.30394
FGD3	2.11467	5.91642	3.79126e-35	2.4425e-34	2.11467
FGF1	-2.02997	4.19053	1.87463e-118	7.44894e-117	2.02997
FGF2	-2.6832	4.01169	1.81238e-103	5.49875e-102	2.6832
FGF21	3.49018	-3.07026	7.38436e-10	1.52533e-09	3.49018
FGF23	3.40221	-3.37498	4.72457e-08	8.80797e-08	3.40221
FGF3	3.30195	-3.32325	6.69764e-11	1.47097e-10	3.30195
FGF4	6.03049	0.290042	4.67005e-10	9.76225e-10	6.03049
FGF5	3.89837	-1.58178	3.92159e-28	1.90682e-27	3.89837
FGF7	-1.65437	3.59181	1.89486e-52	2.07168e-51	1.65437
FGFBP2	-2.69454	1.42878	1.15515e-46	1.07797e-45	2.69454
FGFR3	2.46662	4.9975	7.36438e-32	4.17782e-31	2.46662
FGFR4	1.83995	4.30659	1.1498e-16	3.39211e-16	1.83995
FGG	3.83583	4.04803	1.31719e-09	2.68717e-09	3.83583
FGL1	2.54191	1.37423	2.75837e-09	5.52721e-09	2.54191
FHL1	-4.99504	7.28821	0	0	4.99504
FHL5	-2.56927	1.35754	4.26088e-132	2.06636e-130	2.56927
FIBCD1	2.07214	1.78239	2.59057e-13	6.46226e-13	2.07214
FILIP1	-1.59364	2.89239	4.29078e-70	7.22047e-69	1.59364
FITM1	-3.0584	-0.637576	2.61124e-174	2.11614e-172	3.0584
FKBP4	1.53404	8.65962	2.04331e-63	2.98926e-62	1.53404
FLG2	2.73016	-1.24661	9.26254e-08	1.69517e-07	2.73016
FLNC	-3.1394	4.62048	2.53481e-190	2.38957e-188	3.1394
FLRT2	-1.65341	4.18613	2.61338e-55	3.10131e-54	1.65341
FLVCR1	1.53351	4.78794	2.16983e-80	4.42517e-79	1.53351
FMO2	-3.18513	5.18117	2.33728e-140	1.2853e-138	3.18513
FMR1NB	4.74657	-1.72731	5.10379e-17	1.52915e-16	4.74657
FN1	2.91027	12.2059	3.61574e-77	6.9737e-76	2.91027
FNDC10	1.81038	4.22053	1.20716e-47	1.16231e-46	1.81038
FNDC5	-2.35589	1.51795	1.99422e-101	5.79358e-100	2.35589
FOLR2	-1.86317	3.69913	1.69557e-62	2.43049e-61	1.86317
FOS	-2.51125	8.49539	1.8471e-92	4.55659e-91	2.51125
FOSB	-3.34199	6.8967	2.81382e-119	1.14015e-117	3.34199
FOXA1	1.89426	8.19782	1.9474e-24	8.08405e-24	1.89426
FOXA3	2.27462	0.262787	6.48871e-14	1.66632e-13	2.27462
FOXD1	3.00607	0.810214	1.21057e-25	5.27662e-25	3.00607
FOXD2	1.91421	1.42124	1.77536e-39	1.327e-38	1.91421
FOXD3	3.1017	-0.58634	1.71018e-25	7.41064e-25	3.1017
FOXD4	1.71436	-0.701309	2.41251e-33	1.45673e-32	1.71436
FOXD4L1	2.02793	-2.42889	2.13472e-35	1.38689e-34	2.02793
FOXE3	1.7897	-3.16526	2.05113e-11	4.62856e-11	1.7897
FOXG1	4.29026	-1.76758	3.5301e-17	1.06595e-16	4.29026
FOXH1	2.32465	-1.4714	3.96309e-40	3.02212e-39	2.32465
FOXJ1	4.54848	2.74099	1.96871e-36	1.32083e-35	4.54848
FOXM1	3.51948	5.51568	2.39677e-96	6.38115e-95	3.51948
FOXN3	-1.57734	5.92337	1.68325e-145	9.93656e-144	1.57734
FOXO1	-1.79913	5.17146	1.83966e-156	1.21833e-154	1.79913
FOXO6	1.7364	2.7142	1.76603e-47	1.6881e-46	1.7364
FOXP2	-1.9315	1.71541	2.12146e-63	3.09868e-62	1.9315
FOXP3	2.19816	2.59246	1.33822e-58	1.72549e-57	2.19816
FREM1	-2.88937	2.62059	4.74534e-133	2.33191e-131	2.88937
FRMD1	-4.28931	-0.257696	1.47978e-237	2.29763e-235	4.28931
FRMPD3	2.04697	2.21928	3.32181e-26	1.48685e-25	2.04697
FRMPD4	-1.81761	-2.53026	1.99628e-25	8.64837e-25	1.81761
FSD1	2.91422	-0.279247	1.05212e-25	4.59793e-25	2.91422
FSD2	-3.82585	-1.1428	2.18073e-141	1.21365e-139	3.82585
FSIP1	2.76025	4.18584	1.17583e-29	6.12686e-29	2.76025
FSTL4	1.86082	2.30982	1.75557e-22	6.70476e-22	1.86082
FSTL5	2.74113	-1.83014	4.70768e-09	9.31304e-09	2.74113
FTHL17	7.67912	-1.12466	2.65378e-16	7.69522e-16	7.67912
FUT2	1.69608	3.27129	1.05447e-28	5.25294e-28	1.69608
FUT3	1.93088	2.50238	7.37004e-13	1.80175e-12	1.93088
FUT7	2.08515	-0.409181	7.01577e-30	3.68792e-29	2.08515
FXYD1	-3.54165	0.299369	1.36243e-236	2.06341e-234	3.54165
FXYD4	1.92299	-3.26741	1.82327e-10	3.90909e-10	1.92299
FZD4	-2.62147	6.14674	7.87126e-265	1.54721e-262	2.62147
G0S2	-4.00106	5.04606	2.43108e-218	2.99461e-216	4.00106
GABBR2	3.79758	1.39529	1.06166e-18	3.43123e-18	3.79758
GABRA1	7.03617	0.177133	2.96818e-17	8.99362e-17	7.03617
GABRA2	-1.61684	0.000791087	3.61989e-14	9.42703e-14	1.61684
GABRA3	4.5286	0.173539	5.6462e-20	1.92837e-19	4.5286
GABRA4	-1.5687	-2.51028	4.31259e-07	7.56012e-07	1.5687
GABRA5	5.8055	-0.76612	6.52003e-25	2.7688e-24	5.8055
GABRD	3.28419	1.93199	4.82695e-103	1.4502e-101	3.28419
GABRE	-2.29433	3.85207	1.0153e-48	1.00373e-47	2.29433
GABRG1	-2.32124	-3.36502	2.58921e-39	1.91978e-38	2.32124
GABRG2	5.44903	-0.4032	7.18112e-12	1.66156e-11	5.44903
GABRQ	5.80426	2.05342	6.24239e-32	3.55113e-31	5.80426
GABRR3	2.30246	-3.62849	1.11854e-08	2.1665e-08	2.30246
GAD1	3.36228	1.59429	4.97333e-26	2.20682e-25	3.36228
GADL1	-3.24072	-1.72078	3.31339e-59	4.3358e-58	3.24072
GAGE1	5.56749	-2.77897	2.70019e-12	6.40043e-12	5.56749
GAGE2A	6.11704	-2.5531	5.09924e-13	1.25441e-12	6.11704
GAL	2.62763	1.81189	6.48628e-21	2.30608e-20	2.62763
GAL3ST2	4.08297	0.0119939	3.2407e-34	2.02224e-33	4.08297
GALE	1.67842	5.29221	2.47669e-61	3.42016e-60	1.67842
GALNT15	-3.1587	4.27968	5.73125e-203	5.916e-201	3.1587
GALNT5	1.74075	4.48175	3.7357e-17	1.12656e-16	1.74075
GALNT6	1.64028	7.75394	2.59244e-26	1.16688e-25	1.64028
GALNT8	-1.56873	0.224609	6.07616e-33	3.62509e-32	1.56873
GALR1	-2.71829	-3.0168	1.11972e-57	1.41126e-56	2.71829
GALR2	1.81842	-3.06086	1.63383e-16	4.78269e-16	1.81842
GATA3	1.89464	9.15976	1.86636e-30	1.00159e-29	1.89464
GATA4	5.19091	0.693366	2.17551e-21	7.8694e-21	5.19091
GATA5	3.7479	0.286706	1.57395e-17	4.83892e-17	3.7479
GBP5	2.57722	4.83667	1.38753e-33	8.44165e-33	2.57722
GBX2	4.35825	-2.13127	1.54003e-47	1.47435e-46	4.35825
GC	5.13563	-1.38827	1.82122e-09	3.68411e-09	5.13563
GCG	5.16705	-2.11242	9.54113e-10	1.96054e-09	5.16705
GCGR	2.66839	-2.34388	1.90488e-15	5.2959e-15	2.66839
GCM1	1.7614	-0.486453	5.88245e-12	1.36855e-11	1.7614
GCNT3	2.86391	0.685708	1.43329e-20	5.02237e-20	2.86391
GDA	-2.55649	-1.68104	8.1186e-33	4.8141e-32	2.55649
GDAP1L1	1.56323	-1.4816	1.98978e-10	4.25376e-10	1.56323
GDF10	-3.04145	1.62659	2.70966e-79	5.4009e-78	3.04145
GDF15	2.47567	4.48167	1.13287e-29	5.90466e-29	2.47567
GDF9	3.02981	3.05299	4.28068e-23	1.68106e-22	3.02981
GDPD2	2.90895	0.173027	1.50637e-24	6.28147e-24	2.90895
GFAP	-2.37034	0.722342	1.15997e-50	1.21157e-49	2.37034
GFRA2	-2.0301	0.796746	3.51173e-50	3.63102e-49	2.0301
GFY	3.22495	-2.43421	1.76967e-13	4.45237e-13	3.22495
GGH	1.61518	5.04226	5.0296e-28	2.43086e-27	1.61518
GGT2	-1.74482	-2.6648	4.78985e-22	1.79118e-21	1.74482
GHR	-3.08395	5.00869	5.48411e-209	5.99586e-207	3.08395
GHRH	2.35029	-0.72686	1.36357e-08	2.62718e-08	2.35029
GHSR	4.26477	-2.97267	2.66824e-11	5.98315e-11	4.26477
GIF	1.85724	-4.15088	1.99831e-06	3.34869e-06	1.85724
GIMAP6	-1.51724	4.65013	3.32935e-85	7.35843e-84	1.51724
GIMAP8	-1.81365	4.072	6.25091e-131	3.00776e-129	1.81365
GINS1	2.54732	4.27199	2.54767e-100	7.23093e-99	2.54732
GINS2	2.21198	4.39273	2.18278e-65	3.36654e-64	2.21198
GINS4	2.00502	3.32716	6.39873e-46	5.82124e-45	2.00502
GIP	3.35775	-3.26224	4.11749e-13	1.01723e-12	3.35775
GIPC2	-2.59722	1.4432	3.47624e-150	2.11982e-148	2.59722
GJA3	2.30418	-1.38352	2.34834e-28	1.15308e-27	2.30418
GJB2	4.3431	5.43009	4.64238e-86	1.04479e-84	4.3431
GJB3	1.58374	2.01133	9.50708e-09	1.84908e-08	1.58374
GJB6	1.63344	0.789749	4.74952e-06	7.76884e-06	1.63344
GJD2	2.54004	-3.74761	3.74267e-05	5.77289e-05	2.54004
GKN2	1.78376	-3.54144	0.000306268	0.000443731	1.78376
GLB1L3	-1.66083	-0.559116	7.42805e-22	2.74991e-21	1.66083
GLDC	2.51626	2.98402	2.10943e-17	6.44442e-17	2.51626
GLDN	-2.06758	2.3221	1.96273e-53	2.2019e-52	2.06758
GLP2R	-3.38025	-0.650864	2.43319e-102	7.22798e-101	3.38025
GLRA2	1.86709	-2.73239	7.80397e-07	1.34259e-06	1.86709
GLRA4	-3.2057	-2.35388	2.15993e-93	5.41507e-92	3.2057
GLYAT	-5.85525	1.50685	0	0	5.85525
GLYATL3	3.8066	-0.917155	3.22974e-07	5.71116e-07	3.8066
GMNC	-2.95287	-3.87815	1.96024e-36	1.31563e-35	2.95287
GNAI1	-2.43507	4.28241	2.28003e-184	2.0651e-182	2.43507
GNAL	-2.01543	2.9275	2.55326e-129	1.20349e-127	2.01543
GNAT1	1.67377	-3.74617	4.19926e-13	1.03674e-12	1.67377
GNAT3	5.03223	-0.160254	5.10951e-10	1.06652e-09	5.03223
GNG11	-2.11021	5.03932	7.77512e-182	6.84099e-180	2.11021
GNG13	5.57274	0.124477	1.84439e-53	2.07166e-52	5.57274
GNG2	-2.01513	4.51183	1.90875e-155	1.24622e-153	2.01513
GNG3	2.96531	-0.256739	2.51497e-30	1.34459e-29	2.96531
GNG4	2.87742	3.47622	3.03946e-22	1.14823e-21	2.87742
GNGT1	4.69767	-1.1625	5.31168e-18	1.666e-17	4.69767
GOLGA8K	-1.50985	-3.47074	7.9201e-37	5.40797e-36	1.50985
GOLGA8M	-2.78943	-2.63215	6.01343e-153	3.74108e-151	2.78943
GOLT1A	1.6731	2.80693	4.9835e-34	3.08683e-33	1.6731
GP2	2.732	5.46404	9.95361e-15	2.66618e-14	2.732
GPAM	-4.39041	6.35931	0	0	4.39041
GPAT3	-1.71355	2.54321	1.01385e-57	1.28133e-56	1.71355
GPBAR1	-2.90091	0.171992	7.75609e-243	1.22486e-240	2.90091
GPC2	1.92246	1.45677	1.07158e-24	4.49992e-24	1.92246
GPC3	-2.46273	5.33415	1.23215e-67	1.98141e-66	2.46273
GPD1	-5.23476	6.42218	3.09899e-270	6.65814e-268	5.23476
GPHA2	1.96231	-3.22217	6.15592e-11	1.35457e-10	1.96231
GPIHBP1	-3.45293	2.80332	4.64959e-202	4.74644e-200	3.45293
GPLD1	-2.62854	0.995573	3.36333e-154	2.1429e-152	2.62854
GPM6B	-1.63921	4.33748	8.14371e-51	8.5398e-50	1.63921
GPR139	3.9567	-1.27004	3.61447e-15	9.89987e-15	3.9567
GPR141	1.98047	0.490798	4.83019e-33	2.89482e-32	1.98047
GPR143	1.78114	2.4749	1.48552e-31	8.34033e-31	1.78114
GPR146	-2.72171	0.893684	4.82886e-254	8.49741e-252	2.72171
GPR15	-1.52229	-1.2606	3.67368e-14	9.5617e-14	1.52229
GPR158	2.45955	1.44488	6.86294e-21	2.43437e-20	2.45955
GPR17	-2.27981	-0.721125	6.31422e-65	9.6023e-64	2.27981
GPR182	-2.24427	-1.73376	3.17547e-77	6.13737e-76	2.24427
GPR19	2.37761	0.825168	5.93558e-48	5.76612e-47	2.37761
GPR22	2.71027	-2.03426	1.09012e-14	2.91452e-14	2.71027
GPR26	4.6116	2.28391	8.16928e-21	2.88611e-20	4.6116
GPR34	-1.72055	3.27566	8.05178e-84	1.73395e-82	1.72055
GPR37L1	2.25991	0.677949	1.56257e-25	6.77739e-25	2.25991
GPR50	-1.84728	-4.0627	6.61285e-10	1.37072e-09	1.84728
GPR52	2.66027	-3.38078	3.79463e-13	9.39102e-13	2.66027
GPR6	2.87973	-2.6297	1.84834e-09	3.73733e-09	2.87973
GPR68	1.80452	3.69237	1.35874e-60	1.83787e-59	1.80452
GPR84	1.95301	1.00415	2.33212e-40	1.78873e-39	1.95301
GPRASP1	-1.98381	3.15775	1.22501e-119	5.00763e-118	1.98381
GPRIN1	2.939	3.34429	6.73244e-102	1.9714e-100	2.939
GPX3	-3.61873	7.23424	6.11827e-265	1.21556e-262	3.61873
GRB14	1.83649	3.7255	3.10525e-11	6.93866e-11	1.83649
GRB7	1.54492	6.05018	1.85007e-17	5.66613e-17	1.54492
GREM2	-1.83971	1.27321	1.10968e-37	7.77825e-37	1.83971
GRIA2	3.38544	4.54471	2.16051e-15	5.98856e-15	3.38544
GRIA4	-3.26945	1.36299	5.32327e-80	1.07378e-78	3.26945
GRIN2B	-2.77032	-0.290756	4.63869e-66	7.24506e-65	2.77032
GRIN2C	1.96173	1.70251	7.5368e-18	2.35073e-17	1.96173
GRIN2D	2.26369	2.20089	6.38688e-43	5.33019e-42	2.26369
GRK1	1.51987	-2.77293	8.72492e-10	1.79702e-09	1.51987
GRK3	-1.69489	5.27892	1.27655e-149	7.70811e-148	1.69489
GRM4	5.42357	3.11555	2.62625e-66	4.13333e-65	5.42357
GRM8	2.96983	-0.211625	1.58896e-68	2.59127e-67	2.96983
GSDMC	1.94403	2.00891	6.89487e-16	1.95904e-15	1.94403
GSG2	2.06452	1.54842	1.26108e-58	1.63057e-57	2.06452
GSTA2	2.2966	-1.29586	6.03455e-10	1.25338e-09	2.2966
GSTA3	2.77359	-0.86637	1.93784e-11	4.37935e-11	2.77359
GSTM5	-2.9425	3.56218	1.86635e-72	3.30945e-71	2.9425
GTSE1	3.09727	3.66032	2.25737e-100	6.42937e-99	3.09727
GTSF1	2.09825	0.468985	6.5111e-16	1.85199e-15	2.09825
GTSF1L	1.91724	-3.65235	2.27973e-14	5.99524e-14	1.91724
GUCA1A	1.85113	-2.8662	1.03626e-17	3.21418e-17	1.85113
GYG2	-4.07462	5.26511	0	0	4.07462
GYPC	-1.88503	4.67605	1.65214e-122	7.08275e-121	1.88503
GYS2	-4.76646	-1.20465	2.86171e-201	2.88715e-199	4.76646
GZMB	1.52399	2.04297	7.1285e-13	1.74362e-12	1.52399
GZMK	1.52298	2.55125	5.2832e-15	1.43408e-14	1.52298
H2AFX	1.97041	5.35016	1.57099e-73	2.8486e-72	1.97041
H2AFZ	1.536	7.57323	3.3742e-82	7.1089e-81	1.536
HAGHL	3.53791	3.66571	4.10503e-89	9.71173e-88	3.53791
HAND1	2.0494	-3.41395	1.17795e-05	1.88295e-05	2.0494
HAO1	3.39995	-2.12879	7.23172e-09	1.41667e-08	3.39995
HAO2	1.68449	0.413897	6.04138e-06	9.8237e-06	1.68449
HAP1	-1.57945	0.653803	6.3861e-26	2.82085e-25	1.57945
HAPLN1	5.36245	2.59496	1.41854e-49	1.43619e-48	5.36245
HAS1	-2.17804	0.560989	3.70605e-38	2.64593e-37	2.17804
HAS3	-2.8476	3.39362	3.31658e-122	1.41525e-120	2.8476
HBA1	-3.98405	-2.399	2.86134e-119	1.15687e-117	3.98405
HBA2	-4.35588	2.4033	3.56154e-226	4.63426e-224	4.35588
HBB	-4.85776	4.9274	0	0	4.85776
HBG2	-2.18076	-3.03823	1.09743e-55	1.3167e-54	2.18076
HCAR2	-3.36946	1.73426	6.07627e-233	8.7032e-231	3.36946
HCAR3	-2.15062	-1.02908	4.60196e-96	1.21646e-94	2.15062
HCN2	3.7417	0.873185	1.44413e-58	1.85816e-57	3.7417
HCN4	1.58404	-1.22485	1.12214e-09	2.29713e-09	1.58404
HCRTR1	-1.50149	-2.83024	2.04949e-35	1.33293e-34	1.50149
HCRTR2	2.11684	-2.11668	9.48088e-07	1.62232e-06	2.11684
HDC	2.23703	3.54804	4.02815e-12	9.4488e-12	2.23703
HDGFL1	1.54665	-4.13588	8.73283e-09	1.70243e-08	1.54665
HELLS	1.79697	4.19602	4.34312e-65	6.61564e-64	1.79697
HELT	2.64449	-4.19847	4.89882e-08	9.12824e-08	2.64449
HEPACAM	-5.19063	0.175501	6.49144e-235	9.59539e-233	5.19063
HEPHL1	1.76784	0.0659464	4.13608e-13	1.02155e-12	1.76784
HES2	1.98659	2.6432	1.13214e-18	3.65326e-18	1.98659
HES6	2.93737	3.22591	6.50122e-66	1.01029e-64	2.93737
HES7	1.51705	-2.56496	2.7612e-11	6.18483e-11	1.51705
HFE2	-6.46163	-0.581339	1.93846e-186	1.79085e-184	6.46163
HFM1	-1.59838	-1.46884	2.13328e-28	1.04943e-27	1.59838
HGFAC	1.65628	-1.37724	1.69325e-14	4.48741e-14	1.65628
HGH1	1.54972	5.58882	3.24983e-63	4.73932e-62	1.54972
HHATL	-5.22804	-0.581103	6.55367e-188	6.11576e-186	5.22804
HHIPL2	3.26697	1.70618	1.01701e-30	5.51872e-30	3.26697
HID1	1.64108	7.35948	3.12589e-39	2.31121e-38	1.64108
HIF3A	-3.66171	1.37648	4.28744e-143	2.44503e-141	3.66171
HIST1H1A	3.3193	-3.64485	9.46525e-12	2.17389e-11	3.3193
HIST1H1B	4.44228	-0.655221	2.02024e-31	1.12671e-30	4.44228
HIST1H1C	2.32773	6.48871	8.11661e-37	5.5401e-36	2.32773
HIST1H1D	3.41422	0.304866	6.2094e-30	3.27335e-29	3.41422
HIST1H1E	3.72629	0.87804	1.18728e-31	6.69028e-31	3.72629
HIST1H1T	3.54319	-2.95145	8.9732e-31	4.88502e-30	3.54319
HIST1H2AB	3.56297	-2.93012	1.01712e-22	3.93002e-22	3.56297
HIST1H2AC	1.61328	6.70421	1.17201e-36	7.94393e-36	1.61328
HIST1H2AD	3.51885	0.687024	1.15225e-49	1.16914e-48	3.51885
HIST1H2AE	1.85772	2.32063	3.1111e-20	1.07567e-19	1.85772
HIST1H2AG	2.28248	2.1351	3.97358e-28	1.93109e-27	2.28248
HIST1H2AH	3.22167	-2.3322	3.91003e-19	1.28826e-18	3.22167
HIST1H2AI	4.70258	0.961028	5.87838e-60	7.82527e-59	4.70258
HIST1H2AJ	4.78597	-2.34493	7.54071e-34	4.62736e-33	4.78597
HIST1H2AL	3.75696	-2.4659	2.40114e-36	1.60746e-35	3.75696
HIST1H2AM	4.00963	-0.54674	2.85515e-65	4.38161e-64	4.00963
HIST1H2BB	3.97586	-2.88435	2.73652e-20	9.47755e-20	3.97586
HIST1H2BC	2.69757	2.9862	1.23778e-44	1.08545e-43	2.69757
HIST1H2BD	2.73344	5.40904	1.56856e-67	2.51582e-66	2.73344
HIST1H2BE	3.57998	-1.40894	1.89008e-55	2.25019e-54	3.57998
HIST1H2BF	3.7585	-0.112091	5.57675e-39	4.08571e-38	3.7585
HIST1H2BG	2.40222	2.67787	1.46226e-30	7.87701e-30	2.40222
HIST1H2BH	3.43016	0.837031	2.96768e-52	3.23313e-51	3.43016
HIST1H2BI	4.04098	-2.79637	5.00272e-22	1.86851e-21	4.04098
HIST1H2BJ	2.60334	1.81914	2.2634e-43	1.91663e-42	2.60334
HIST1H2BK	2.15116	5.06641	2.34651e-57	2.93743e-56	2.15116
HIST1H2BL	3.28405	-1.66154	4.33412e-35	2.78448e-34	3.28405
HIST1H2BM	4.9445	-2.53335	5.95557e-29	3.00576e-28	4.9445
HIST1H2BN	1.64903	1.75842	3.08971e-34	1.93178e-33	1.64903
HIST1H2BO	4.43007	-0.696399	1.4643e-59	1.93533e-58	4.43007
HIST1H3A	1.85583	-2.40612	5.40247e-13	1.32812e-12	1.85583
HIST1H3B	5.17744	-0.799139	8.14007e-40	6.14647e-39	5.17744
HIST1H3C	3.65412	-1.93555	8.05235e-32	4.5625e-31	3.65412
HIST1H3D	3.45316	1.1608	4.19479e-54	4.8291e-53	3.45316
HIST1H3F	4.14251	-1.77318	1.24949e-28	6.20113e-28	4.14251
HIST1H3G	3.05756	0.569543	6.89913e-31	3.77481e-30	3.05756
HIST1H3H	4.34523	3.49059	3.09602e-68	5.018e-67	4.34523
HIST1H3I	5.02296	-3.12858	7.18232e-26	3.16348e-25	5.02296
HIST1H3J	4.26398	-1.93103	3.89676e-57	4.85178e-56	4.26398
HIST1H4A	3.85757	-3.01983	1.8992e-20	6.62229e-20	3.85757
HIST1H4B	4.23361	-1.92038	1.48116e-23	5.94558e-23	4.23361
HIST1H4C	4.00602	-0.974218	4.22594e-28	2.05103e-27	4.00602
HIST1H4D	4.1106	-0.815673	5.19288e-42	4.21568e-41	4.1106
HIST1H4E	3.8183	0.327485	1.67839e-38	1.21376e-37	3.8183
HIST1H4F	3.14983	-3.84355	4.00421e-10	8.39889e-10	3.14983
HIST1H4H	2.67287	3.02441	4.74537e-38	3.37102e-37	2.67287
HIST1H4I	2.08586	4.0097	6.74469e-56	8.12397e-55	2.08586
HIST1H4J	2.44259	-1.96286	1.13174e-36	7.67662e-36	2.44259
HIST1H4K	2.47663	-1.58338	5.39397e-38	3.82295e-37	2.47663
HIST1H4L	4.23962	-3.78063	1.45039e-13	3.66304e-13	4.23962
HIST2H2AA3	2.63804	-4.14092	6.98063e-20	2.37534e-19	2.63804
HIST2H2AA4	2.17892	-4.26283	7.21609e-14	1.84926e-13	2.17892
HIST2H2AB	3.60827	-1.96918	7.08796e-24	2.88531e-23	3.60827
HIST2H2AC	2.77447	0.323987	1.43131e-37	1.00175e-36	2.77447
HIST2H2BE	2.06181	6.33033	1.99143e-43	1.68787e-42	2.06181
HIST2H2BF	2.68613	1.75249	1.41685e-38	1.02623e-37	2.68613
HIST2H3C	3.66278	-3.65063	1.37613e-11	3.13407e-11	3.66278
HIST2H3D	2.2056	-2.62979	2.37837e-21	8.57632e-21	2.2056
HIST2H4A	2.922	-0.731848	1.02681e-49	1.04416e-48	2.922
HIST3H2A	2.11986	4.15941	2.06196e-30	1.10463e-29	2.11986
HIST3H2BB	3.17774	1.48601	1.51822e-46	1.40895e-45	3.17774
HJURP	3.57966	3.92911	6.56619e-120	2.70208e-118	3.57966
HLF	-2.80239	3.73381	1.27614e-124	5.58749e-123	2.80239
HMCN2	-2.08249	2.41515	5.73099e-60	7.63457e-59	2.08249
HMGA1	1.62004	7.13956	4.08894e-47	3.87244e-46	1.62004
HMGA2	2.68864	0.0593526	8.96717e-25	3.78279e-24	2.68864
HMGB3	2.4835	6.32983	1.53625e-78	3.03261e-77	2.4835
HMMR	3.09039	3.90985	9.20952e-114	3.39649e-112	3.09039
HMP19	5.8859	2.4317	1.64328e-31	9.20366e-31	5.8859
HMX1	1.56571	-2.43366	1.08161e-06	1.84261e-06	1.56571
HMX2	4.54686	-1.90114	1.95809e-20	6.82376e-20	4.54686
HMX3	2.75987	-2.67184	2.92969e-09	5.86413e-09	2.75987
HN1	2.27019	6.88325	1.42871e-79	2.86005e-78	2.27019
HOGA1	-1.77927	0.0297274	1.36473e-36	9.22993e-36	1.77927
HORMAD1	4.15441	1.85053	6.93843e-21	2.45974e-20	4.15441
HORMAD2	-1.76502	-3.98148	1.0352e-16	3.0594e-16	1.76502
HOXA2	-2.06474	-0.287589	1.30352e-60	1.76449e-59	2.06474
HOXA3	-1.75199	1.88338	4.12558e-54	4.75239e-53	1.75199
HOXA4	-2.24103	0.276667	1.453e-109	4.92606e-108	2.24103
HOXA5	-2.31302	2.19739	4.25862e-94	1.08086e-92	2.31302
HOXA6	-2.27876	-0.480979	5.43125e-64	8.07998e-63	2.27876
HOXA7	-1.89367	0.591703	4.07727e-43	3.42279e-42	1.89367
HOXB1	2.04627	-2.00498	1.15987e-12	2.80436e-12	2.04627
HOXB13	5.72343	2.44264	1.52627e-27	7.19778e-27	5.72343
HOXB5	1.9795	2.61915	3.00171e-15	8.26075e-15	1.9795
HOXB6	1.64084	3.12122	3.36009e-14	8.76527e-14	1.64084
HOXB9	2.68665	1.42207	3.23743e-31	1.78881e-30	2.68665
HOXC10	2.55585	5.31417	1.29836e-34	8.19324e-34	2.55585
HOXC11	3.63567	3.18797	2.34075e-43	1.98032e-42	3.63567
HOXC12	4.14631	2.5166	7.01863e-27	3.22916e-26	4.14631
HOXC13	3.03244	3.51816	6.75883e-46	6.14581e-45	3.03244
HOXD12	2.00657	-4.26976	3.59635e-08	6.7544e-08	2.00657
HOXD13	1.92753	-0.88904	6.89818e-10	1.42826e-09	1.92753
HPDL	2.08125	1.40474	1.39892e-19	4.68939e-19	2.08125
HPN	2.28918	5.49367	1.24462e-36	8.42996e-36	2.28918
HPSE2	-3.14665	0.924459	1.0629e-88	2.49864e-87	3.14665
HPX	2.04951	4.65752	1.14853e-17	3.5517e-17	2.04951
HRASLS2	1.63334	2.18827	1.60768e-16	4.70762e-16	1.63334
HRASLS5	-2.1087	4.06691	2.1446e-39	1.59717e-38	2.1087
HRC	-2.77676	1.12659	1.46619e-139	7.94453e-138	2.77676
HRG	2.35751	-3.71429	1.29245e-07	2.34491e-07	2.35751
HRH3	3.03706	-1.88855	5.39787e-14	1.39277e-13	3.03706
HS3ST3A1	1.99156	0.316341	4.95333e-41	3.88302e-40	1.99156
HS3ST4	-2.6886	0.0506502	1.82563e-29	9.43291e-29	2.6886
HS3ST6	2.32427	-1.11734	6.82666e-10	1.41408e-09	2.32427
HS6ST3	2.92172	3.66104	3.1059e-25	1.33615e-24	2.92172
HSD11B1	-2.39161	2.2626	2.27858e-74	4.18918e-73	2.39161
HSD17B13	-5.01839	0.243002	0	0	5.01839
HSD17B6	3.05451	2.412	1.88097e-134	9.39318e-133	3.05451
HSD3B2	5.07958	0.91867	4.00057e-15	1.09282e-14	5.07958
HSH2D	2.73291	4.38263	3.8722e-49	3.87367e-48	2.73291
HSPA12A	-1.88431	3.91813	1.49357e-121	6.272e-120	1.88431
HSPA6	1.5904	3.15237	2.37627e-20	8.25152e-20	1.5904
HSPB1	1.58581	9.14149	8.69668e-28	4.16076e-27	1.58581
HSPB2	-2.47383	0.645113	2.62349e-126	1.17656e-124	2.47383
HSPB2-C11orf52	-2.90676	-4.21348	4.86675e-99	1.35426e-97	2.90676
HSPB3	-3.42589	-2.09315	1.0432e-23	4.2113e-23	3.42589
HSPB6	-4.51015	5.02032	0	0	4.51015
HSPB7	-5.07032	4.07721	0	0	5.07032
HTN1	5.52501	-1.3681	2.01904e-10	4.31232e-10	5.52501
HTR1D	3.67108	0.335954	1.84765e-55	2.20252e-54	3.67108
HTR1E	3.67615	-2.4923	1.23686e-16	3.64604e-16	3.67615
HTR2A	-2.52449	-0.307053	1.24063e-72	2.2084e-71	2.52449
HTR2C	2.5874	-2.28692	1.82902e-07	3.28583e-07	2.5874
HTR3A	2.732	-0.618927	3.33123e-14	8.69242e-14	2.732
HTR4	-1.92251	-3.57045	3.54239e-39	2.61393e-38	1.92251
HUS1B	2.54822	-0.800043	1.49519e-17	4.60291e-17	2.54822
HYPM	2.75869	-4.26973	1.88695e-15	5.24936e-15	2.75869
IAPP	6.72365	-0.963796	7.60459e-12	1.75572e-11	6.72365
IBSP	8.09426	2.71103	1.60729e-79	3.21405e-78	8.09426
ICOS	1.92114	1.16457	1.06203e-22	4.09924e-22	1.92114
ID4	-1.8052	5.02021	3.28181e-36	2.18831e-35	1.8052
IDI2	-5.36844	-2.92132	2.16147e-182	1.92007e-180	5.36844
IDO1	2.11162	4.2473	4.20187e-17	1.26405e-16	2.11162
IDO2	1.81918	-1.97232	4.76091e-14	1.23238e-13	1.81918
IER5L	1.80311	4.22109	1.16635e-52	1.28049e-51	1.80311
IFI27	1.922	8.15599	9.93273e-23	3.84109e-22	1.922
IFI6	2.94068	8.54982	5.14867e-46	4.70252e-45	2.94068
IFITM5	3.55113	-1.14543	9.29769e-13	2.26246e-12	3.55113
IFNB1	3.34646	-3.64678	4.22831e-23	1.66156e-22	3.34646
IFNG	1.84662	-1.13553	2.42062e-13	6.04811e-13	1.84662
IFNK	1.79797	-3.71528	0.000197013	0.000289757	1.79797
IFNL1	3.011	-2.47546	5.08756e-23	1.9899e-22	3.011
IFNL2	4.30112	-3.30805	3.97316e-28	1.93109e-27	4.30112
IFNL3	4.0878	-3.28036	9.18753e-28	4.38934e-27	4.0878
IGF1	-2.44622	2.06581	3.85197e-104	1.18227e-102	2.44622
IGF2BP1	3.7609	-0.124022	4.4027e-30	2.33091e-29	3.7609
IGF2BP3	2.68447	0.183765	6.19706e-18	1.9381e-17	2.68447
IGFALS	2.93374	2.17839	1.93441e-31	1.0808e-30	2.93374
IGFBP6	-3.15019	4.20991	1.30132e-248	2.16617e-246	3.15019
IGFBPL1	2.51385	-0.802741	2.15057e-24	8.92143e-24	2.51385
IGFL2	3.25992	0.847999	5.08444e-41	3.98411e-40	3.25992
IGFL3	4.93486	-0.807435	1.04527e-40	8.10808e-40	4.93486
IGSF10	-2.8302	3.25898	2.29361e-100	6.51986e-99	2.8302
IGSF23	2.36112	-2.0995	7.22856e-14	1.8522e-13	2.36112
IGSF9	2.03171	5.7631	7.09676e-61	9.66299e-60	2.03171
IL11	1.66381	0.159692	2.12282e-32	1.2315e-31	1.66381
IL12B	2.15319	-1.48545	1.22631e-22	4.7235e-22	2.15319
IL17B	-2.00563	0.329888	3.20239e-34	2.00036e-33	2.00563
IL17C	2.66709	-3.05801	4.7869e-20	1.64187e-19	2.66709
IL17D	-1.9904	0.886763	7.2006e-126	3.19821e-124	1.9904
IL17REL	3.18552	0.0816315	3.61618e-32	2.0815e-31	3.18552
IL19	5.36894	0.0757208	7.33855e-33	4.36416e-32	5.36894
IL20	3.51863	2.38076	5.27727e-26	2.33945e-25	3.51863
IL21	2.37643	-3.7877	6.59424e-12	1.52875e-11	2.37643
IL21R	2.68021	2.33743	2.49621e-57	3.12271e-56	2.68021
IL27	1.76108	-1.84948	1.23144e-31	6.93488e-31	1.76108
IL33	-2.65723	4.23567	2.97567e-94	7.58364e-93	2.65723
IL36G	1.65601	-3.11939	1.41241e-06	2.38897e-06	1.65601
IL36RN	3.1053	-1.72661	1.80668e-13	4.543e-13	3.1053
IL4I1	2.74111	3.4737	1.06054e-57	1.3385e-56	2.74111
IL6	-2.72009	2.1928	9.3189e-73	1.66685e-71	2.72009
IL9	1.58464	-4.27098	3.90912e-05	6.01956e-05	1.58464
IL9R	2.13468	-1.06847	4.48124e-37	3.08724e-36	2.13468
ILDR2	2.31301	0.899972	7.82619e-50	7.97598e-49	2.31301
INA	3.83871	0.532103	4.64341e-20	1.59295e-19	3.83871
INHA	2.85594	1.6767	7.49772e-26	3.29925e-25	2.85594
INHBA	3.45641	6.26749	1.80657e-111	6.37021e-110	3.45641
INMT	-2.45666	2.55833	4.19184e-112	1.50102e-110	2.45666
INMT-FAM188B	-2.32348	-4.30678	1.93992e-43	1.64497e-42	2.32348
INS	5.91271	-2.36015	1.09336e-12	2.64841e-12	5.91271
INSL4	1.55522	-3.58169	0.000274624	0.000399546	1.55522
INSM1	5.2915	2.89602	4.6363e-30	2.45107e-29	5.2915
IQGAP3	3.75582	5.2888	3.37697e-128	1.5483e-126	3.75582
IQSEC3	-2.05506	1.17965	5.07907e-71	8.6814e-70	2.05506
IRF7	2.00452	5.44595	5.77787e-62	8.14323e-61	2.00452
IRS4	3.83984	1.47734	1.22164e-10	2.6428e-10	3.83984
IRX6	-2.40005	1.44992	1.71502e-54	1.99298e-53	2.40005
ISG15	3.58724	6.93917	1.19257e-55	1.42715e-54	3.58724
ISL2	2.52304	-1.96468	8.72606e-15	2.34553e-14	2.52304
ISM1	-2.13546	3.8665	5.10151e-99	1.41745e-97	2.13546
ISX	3.00184	-1.27447	8.91023e-07	1.52665e-06	3.00184
ITIH1	1.65795	-1.73357	1.1835e-09	2.42027e-09	1.65795
ITIH2	-2.16353	1.0138	5.92474e-34	3.65514e-33	2.16353
ITIH5	-3.95363	5.67474	0	0	3.95363
ITLN1	-3.92536	-2.39229	9.76672e-92	2.39336e-90	3.92536
ITLN2	3.14886	-2.83191	3.68939e-13	9.13303e-13	3.14886
ITM2A	-2.19353	4.88347	2.23698e-102	6.65583e-101	2.19353
ITPKA	3.41232	0.583359	1.30816e-54	1.5269e-53	3.41232
ITPRIPL1	-2.31675	1.6961	4.89758e-126	2.18581e-124	2.31675
ITSN1	-1.74276	5.75045	6.98014e-214	8.21478e-212	1.74276
IVL	4.119	0.389298	9.43533e-17	2.79296e-16	4.119
JAKMIP1	2.82677	0.944623	1.4313e-45	1.29068e-44	2.82677
JAM2	-2.00924	4.43545	8.89727e-145	5.21888e-143	2.00924
JCHAIN	-1.88434	7.86197	5.88718e-32	3.35422e-31	1.88434
JPH2	-2.37191	3.03199	4.54665e-79	9.04289e-78	2.37191
JPH3	2.46598	0.676603	1.42868e-26	6.48433e-26	2.46598
KANK1	-1.80749	5.7181	4.90547e-131	2.36654e-129	1.80749
KANK3	-1.77304	2.22752	7.48108e-78	1.46118e-76	1.77304
KAZALD1	1.61106	4.04526	1.57885e-24	6.5763e-24	1.61106
KBTBD12	-2.02376	-0.193721	1.3448e-19	4.5145e-19	2.02376
KCNA1	-2.0389	-0.236624	3.26353e-36	2.17691e-35	2.0389
KCNA2	-2.82613	-1.67016	9.61973e-84	2.06919e-82	2.82613
KCNA4	-2.75305	-2.76411	1.37042e-30	7.40237e-30	2.75305
KCNA7	-4.72475	-1.99094	5.9253e-206	6.36522e-204	4.72475
KCNAB1	-1.75919	2.52684	2.50489e-91	6.06591e-90	1.75919
KCNB1	-2.80129	2.72747	1.52546e-78	3.01453e-77	2.80129
KCNC1	1.8595	0.848909	3.34235e-10	7.0434e-10	1.8595
KCNE1	-2.41479	-1.33013	3.66419e-80	7.4236e-79	2.41479
KCNE1B	-2.93185	-2.46168	3.10024e-73	5.59952e-72	2.93185
KCNE4	2.65542	6.26624	7.88945e-30	4.13541e-29	2.65542
KCNF1	2.59235	3.1334	5.26443e-20	1.80131e-19	2.59235
KCNG1	2.39784	2.51337	7.79756e-16	2.21178e-15	2.39784
KCNG3	2.8294	-0.806147	2.6047e-35	1.6863e-34	2.8294
KCNH1	3.06477	1.56584	3.68827e-32	2.12102e-31	3.06477
KCNH2	2.39113	2.49595	1.66694e-23	6.67823e-23	2.39113
KCNH6	3.9316	-0.761565	3.97957e-23	1.56615e-22	3.9316
KCNH8	-1.95221	0.226151	1.58535e-32	9.2522e-32	1.95221
KCNIP2	-5.07707	4.06484	0	0	5.07707
KCNJ10	2.44852	0.361583	1.94443e-37	1.35779e-36	2.44852
KCNJ16	-2.25434	1.27174	5.70063e-22	2.12275e-21	2.25434
KCNJ18	2.76038	-3.6955	4.23641e-08	7.92751e-08	2.76038
KCNJ3	5.25388	5.82387	1.79506e-28	8.86117e-28	5.25388
KCNJ4	2.91187	-3.03326	4.95598e-13	1.21966e-12	2.91187
KCNJ6	2.99418	0.238534	1.99654e-27	9.36532e-27	2.99418
KCNK1	1.99002	4.92066	4.71891e-27	2.18853e-26	1.99002
KCNK15	2.57398	4.09479	1.84923e-34	1.16298e-33	2.57398
KCNK16	2.99455	-3.08502	1.22569e-08	2.36745e-08	2.99455
KCNK6	1.55061	5.94398	7.78077e-38	5.47677e-37	1.55061
KCNK9	3.1076	-1.27225	4.53596e-29	2.30186e-28	3.1076
KCNMB1	-2.36069	3.41001	5.76526e-106	1.83347e-104	2.36069
KCNQ2	2.16469	-0.83824	1.03052e-08	2.0001e-08	2.16469
KCTD12	-1.57357	6.89402	1.62154e-108	5.40816e-107	1.57357
KCTD8	-1.89403	-3.18187	3.26666e-23	1.29081e-22	1.89403
KHDC1L	2.00241	-3.45916	7.82586e-10	1.61454e-09	2.00241
KIAA0101	3.37398	4.26204	6.00446e-136	3.08179e-134	3.37398
KIAA0319	2.49222	0.802436	1.90529e-22	7.26455e-22	2.49222
KIAA0408	-4.42987	-2.1691	3.33953e-265	6.70702e-263	4.42987
KIAA1024L	1.9335	-4.09374	1.01203e-09	2.07724e-09	1.9335
KIAA1211	2.72079	2.72873	1.7289e-50	1.7987e-49	2.72079
KIAA1257	1.98386	1.52075	3.25294e-38	2.32873e-37	1.98386
KIAA1456	-1.91514	2.84867	7.60846e-53	8.39293e-52	1.91514
KIAA1524	1.92282	3.5404	1.78598e-59	2.35543e-58	1.92282
KIAA1644	1.79788	2.24788	1.17399e-21	4.3082e-21	1.79788
KIF11	2.56425	5.2889	7.37202e-106	2.33241e-104	2.56425
KIF14	3.55477	3.62148	2.24761e-95	5.84917e-94	3.55477
KIF15	2.58927	3.60944	4.00507e-85	8.82023e-84	2.58927
KIF18A	2.47646	3.12788	1.39999e-79	2.8056e-78	2.47646
KIF18B	3.62264	3.59562	1.89648e-106	6.07301e-105	3.62264
KIF1A	4.33847	4.11051	3.47999e-27	1.62209e-26	4.33847
KIF20A	3.4301	4.87484	1.54079e-112	5.53874e-111	3.4301
KIF22	1.5291	6.22419	5.41092e-87	1.23582e-85	1.5291
KIF23	2.68438	4.79885	7.06794e-105	2.20972e-103	2.68438
KIF24	1.63359	3.35443	1.19685e-76	2.27982e-75	1.63359
KIF25	-1.89993	-0.625725	7.79495e-46	7.07751e-45	1.89993
KIF26B	2.86024	5.13591	3.68863e-80	7.46493e-79	2.86024
KIF2C	3.3773	4.79278	6.3977e-104	1.95713e-102	3.3773
KIF4A	3.8932	4.7645	6.24429e-141	3.46474e-139	3.8932
KIF4B	1.9572	-3.46192	3.09867e-28	1.51206e-27	1.9572
KIFC1	3.21362	5.13615	5.60648e-111	1.9472e-109	3.21362
KIFC2	2.16735	4.55497	1.32263e-55	1.58176e-54	2.16735
KIR2DL4	1.97397	-1.85075	3.33293e-15	9.1491e-15	1.97397
KIR3DL3	2.18603	-4.28282	1.08429e-06	1.84666e-06	2.18603
KIRREL2	2.22285	-0.519617	5.36846e-14	1.38538e-13	2.22285
KISS1	2.78116	-1.5102	2.08839e-29	1.07455e-28	2.78116
KISS1R	4.23958	0.430646	2.28979e-39	1.70324e-38	4.23958
KIT	-2.92768	5.94058	4.86226e-122	2.07005e-120	2.92768
KL	-2.42595	1.52101	1.26219e-129	5.97985e-128	2.42595
KLB	-4.65729	2.64401	0	0	4.65729
KLF1	1.70549	-2.56677	3.36628e-32	1.94128e-31	1.70549
KLF14	-1.9758	-1.44688	9.82903e-40	7.40363e-39	1.9758
KLF15	-3.3284	2.0077	7.53665e-206	8.04941e-204	3.3284
KLF17	1.78788	-1.7127	1.71808e-11	3.89509e-11	1.78788
KLF4	-2.5068	5.43201	8.33051e-172	6.5499e-170	2.5068
KLF9	-1.66448	5.9333	5.2969e-129	2.47774e-127	1.66448
KLHDC7B	2.97691	4.36153	6.7067e-27	3.08719e-26	2.97691
KLHDC9	1.70027	3.47557	7.62552e-33	4.52898e-32	1.70027
KLHL1	7.64549	1.38615	2.13349e-15	5.91634e-15	7.64549
KLHL13	-2.56065	3.63848	8.09731e-99	2.23638e-97	2.56065
KLHL29	-2.43114	2.7922	2.59106e-143	1.4822e-141	2.43114
KLHL30	-2.76031	0.150584	2.34585e-97	6.34615e-96	2.76031
KLHL31	-3.82574	2.29057	0	0	3.82574
KLHL33	-4.01413	-2.05787	2.49511e-262	4.75279e-260	4.01413
KLHL35	1.95607	2.97494	4.17259e-37	2.87782e-36	1.95607
KLHL4	-1.71304	0.319188	7.27262e-46	6.60975e-45	1.71304
KLHL40	-7.26407	-0.990438	1.08856e-153	6.86462e-152	7.26407
KLHL41	-6.43637	3.25308	0	0	6.43637
KLK12	3.16801	1.50246	2.14009e-10	4.56505e-10	3.16801
KLK13	1.75862	1.48675	8.87266e-07	1.52041e-06	1.75862
KLK14	2.09333	3.19922	4.43209e-09	8.78196e-09	2.09333
KLK4	3.14247	1.72119	5.83522e-42	4.72262e-41	3.14247
KLK9	1.60086	-3.44603	0.000815248	0.00114411	1.60086
KLRG2	1.89136	2.69292	1.28476e-19	4.31922e-19	1.89136
KMO	1.80454	3.25513	5.53994e-22	2.06457e-21	1.80454
KNCN	2.74075	-4.13241	7.67021e-11	1.67918e-10	2.74075
KNDC1	1.87479	2.13711	5.78396e-11	1.27424e-10	1.87479
KNG1	3.57623	-2.36213	1.93134e-14	5.10227e-14	3.57623
KNL1	2.87161	3.86354	1.73912e-103	5.28516e-102	2.87161
KPNA2	2.21359	7.27915	1.72627e-80	3.52835e-79	2.21359
KPNA7	2.10778	-0.965966	2.71891e-23	1.07759e-22	2.10778
KPRP	4.70717	-2.2822	3.56487e-10	7.50121e-10	4.70717
KREMEN2	4.01624	1.83049	1.27274e-63	1.8768e-62	4.01624
KRT1	5.65512	4.33525	1.58596e-21	5.77642e-21	5.65512
KRT14	-1.73265	7.8895	3.13764e-15	8.62581e-15	1.73265
KRT16	1.98356	5.96091	4.69382e-09	9.28661e-09	1.98356
KRT17	-1.50463	7.76047	3.82871e-14	9.95401e-14	1.50463
KRT18	1.73867	9.66939	3.02551e-41	2.39616e-40	1.73867
KRT19	1.98421	10.6388	8.95466e-44	7.6813e-43	1.98421
KRT2	3.49103	-1.61895	4.19909e-20	1.44347e-19	3.49103
KRT20	5.71943	1.1434	6.40044e-16	1.82136e-15	5.71943
KRT24	2.944	-0.32154	1.52641e-10	3.28712e-10	2.944
KRT3	3.2273	-2.96449	1.08991e-19	3.67689e-19	3.2273
KRT31	2.32747	0.0604991	2.60527e-10	5.52735e-10	2.32747
KRT33B	2.10752	-3.22668	1.8183e-05	2.86686e-05	2.10752
KRT34	4.3515	-2.70701	1.35018e-13	3.41324e-13	4.3515
KRT35	3.61487	-2.52822	7.50427e-13	1.83384e-12	3.61487
KRT37	3.35563	-1.44172	1.52544e-29	7.90177e-29	3.35563
KRT38	2.60236	-3.49341	4.54163e-09	8.99225e-09	2.60236
KRT4	1.75469	3.15275	0.000139409	0.000206946	1.75469
KRT5	-1.6986	8.25885	3.72339e-16	1.07278e-15	1.6986
KRT6A	2.42218	5.38399	1.45875e-08	2.80471e-08	2.42218
KRT6C	2.35097	1.55767	1.49762e-07	2.70521e-07	2.35097
KRT73	1.60514	-3.85071	7.72404e-07	1.32958e-06	1.60514
KRT74	-1.57079	-3.94563	6.60167e-12	1.53028e-11	1.57079
KRT75	4.29173	0.93055	2.7302e-22	1.03373e-21	4.29173
KRT77	2.13777	0.0285044	2.93456e-05	4.5649e-05	2.13777
KRT78	2.50934	-1.86145	6.74508e-08	1.24716e-07	2.50934
KRT79	1.98865	1.92405	1.16972e-06	1.98885e-06	1.98865
KRT8	1.90756	10.3195	6.66199e-48	6.45821e-47	1.90756
KRT81	2.45996	6.37528	1.08362e-11	2.48197e-11	2.45996
KRT85	2.01015	-3.07871	2.36503e-08	4.49298e-08	2.01015
KRT86	2.04483	2.89184	1.22364e-15	3.44233e-15	2.04483
KRTAP17-1	2.38199	-3.7376	3.52023e-10	7.41234e-10	2.38199
KRTAP21-2	2.609	-4.25089	4.89789e-09	9.68103e-09	2.609
KRTAP3-1	2.44926	-3.27465	2.00895e-11	4.53672e-11	2.44926
KRTAP3-3	2.92287	-1.84635	7.88899e-07	1.35658e-06	2.92287
KRTAP4-1	3.29543	-3.65744	9.92342e-09	1.92823e-08	3.29543
KRTAP5-10	1.65188	-1.40306	9.22475e-17	2.73194e-16	1.65188
KRTAP5-6	2.15562	-4.3058	3.44141e-14	8.97486e-14	2.15562
KRTAP9-4	3.69297	-4.06681	7.78651e-09	1.5218e-08	3.69297
KRTDAP	3.48268	1.63963	1.83131e-13	4.6037e-13	3.48268
KY	-3.27395	-0.556791	1.51736e-127	6.93969e-126	3.27395
LACRT	2.25434	3.73909	0.000879748	0.00123201	2.25434
LAG3	2.04493	2.56968	1.21347e-28	6.02398e-28	2.04493
LAGE3	2.04121	4.89894	3.3438e-71	5.7473e-70	2.04121
LAMA2	-1.72355	5.56472	5.30826e-58	6.75488e-57	1.72355
LAMA3	-1.73059	6.05831	2.27289e-42	1.86899e-41	1.73059
LAMP3	1.95765	3.83773	6.95348e-22	2.57732e-21	1.95765
LAMP5	3.01175	3.90301	6.86604e-64	1.01899e-62	3.01175
LARP6	-1.6053	3.59912	2.69395e-78	5.29533e-77	1.6053
LBP	1.96354	4.70384	2.6983e-08	5.10981e-08	1.96354
LBX2	1.88548	0.517504	7.45995e-51	7.84058e-50	1.88548
LCE1A	5.62698	-2.9258	1.03983e-11	2.38285e-11	5.62698
LCE1B	5.48581	-2.60587	5.96646e-12	1.38792e-11	5.48581
LCE1C	2.9152	-1.81003	2.8947e-07	5.13344e-07	2.9152
LCE1D	3.81264	-3.9637	2.47539e-08	4.69732e-08	3.81264
LCE1F	5.00373	-3.38457	5.54802e-11	1.22342e-10	5.00373
LCE2A	3.66891	-4.11598	2.82546e-09	5.65857e-09	3.66891
LCE2B	5.91506	-2.78313	1.94382e-12	4.6439e-12	5.91506
LCE2C	4.97726	-3.34991	1.99036e-10	4.25451e-10	4.97726
LCE2D	4.53814	-3.66827	2.03953e-10	4.35507e-10	4.53814
LCE3D	3.95195	-3.61395	1.10264e-08	2.13648e-08	3.95195
LCE5A	3.12751	-3.6714	2.65372e-08	5.02797e-08	3.12751
LCE6A	4.16637	-3.65162	2.27484e-08	4.32564e-08	4.16637
LCN1	3.08144	-3.52765	2.29312e-29	1.17793e-28	3.08144
LCN10	-1.5565	-2.42267	7.37917e-15	1.98812e-14	1.5565
LCN12	2.08945	1.53083	2.52008e-25	1.08819e-24	2.08945
LCN6	-2.23341	-1.70062	2.23543e-46	2.06005e-45	2.23341
LCTL	1.58109	-0.915307	6.39135e-26	2.82249e-25	1.58109
LDB2	-2.08677	4.28929	2.4972e-198	2.44131e-196	2.08677
LDB3	-5.62746	3.37729	0	0	5.62746
LDHD	-1.56563	3.15488	3.47001e-38	2.47837e-37	1.56563
LDLRAD1	1.87067	0.231312	1.86231e-14	4.92486e-14	1.87067
LDLRAD2	-1.81871	0.989452	1.94667e-113	7.1225e-112	1.81871
LECT1	3.28988	0.0913246	1.9937e-10	4.26064e-10	3.28988
LEF1	2.08198	4.75626	2.09152e-49	2.10714e-48	2.08198
LEFTY1	1.59651	-1.24277	1.5875e-12	3.81334e-12	1.59651
LEMD1	1.60057	0.450414	1.33867e-06	2.26881e-06	1.60057
LEP	-6.09362	5.28092	9.60256e-250	1.61297e-247	6.09362
LEPR	-2.91892	4.26193	7.9165e-237	1.21894e-234	2.91892
LGALS12	-4.46006	3.05324	7.21047e-192	6.86741e-190	4.46006
LGALS7B	1.82932	1.20716	6.6885e-07	1.15574e-06	1.82932
LGALS9B	2.85666	-1.13341	8.25707e-21	2.91546e-20	2.85666
LGALS9C	2.55467	-0.907734	1.45686e-21	5.31461e-21	2.55467
LGI4	-2.32858	2.0045	1.07785e-154	6.9392e-153	2.32858
LGSN	1.96024	-2.24507	1.18593e-08	2.29281e-08	1.96024
LHCGR	-2.8181	-1.41216	1.5417e-26	6.98359e-26	2.8181
LHFP	-1.98001	5.55512	5.62986e-164	4.11158e-162	1.98001
LHFPL4	2.5717	-0.323227	7.26371e-12	1.67932e-11	2.5717
LHFPL5	3.84543	-0.470268	6.54972e-35	4.17739e-34	3.84543
LHX1	5.95181	0.0856806	1.25997e-20	4.42091e-20	5.95181
LHX2	4.40379	-0.176502	5.49884e-47	5.18113e-46	4.40379
LHX3	4.15751	-3.60927	9.27106e-15	2.48876e-14	4.15751
LHX5	2.40444	-3.06638	2.23651e-09	4.50398e-09	2.40444
LHX6	-1.67537	2.86781	1.13381e-70	1.92196e-69	1.67537
LHX9	3.66798	-1.3494	2.05462e-17	6.28114e-17	3.66798
LIFR	-2.50359	5.70697	1.06259e-176	8.76493e-175	2.50359
LILRB5	-2.73494	2.39752	3.67768e-142	2.07172e-140	2.73494
LIMD2	1.70197	4.38174	2.44443e-33	1.47552e-32	1.70197
LIMS2	-1.93578	4.59189	6.04695e-139	3.21987e-137	1.93578
LIN28A	5.3555	0.560309	1.83841e-19	6.12704e-19	5.3555
LIN28B	4.27602	-2.19891	1.92119e-10	4.10997e-10	4.27602
LINGO1	2.56783	4.592	1.33776e-40	1.03465e-39	2.56783
LIPE	-4.48309	5.94843	0	0	4.48309
LIPF	2.21713	-1.72294	6.67056e-06	1.08182e-05	2.21713
LIPM	2.01987	-0.895906	1.3792e-32	8.0823e-32	2.01987
LIX1	3.75053	-1.54103	1.40752e-26	6.393e-26	3.75053
LKAAEAR1	2.87219	-2.50416	2.18493e-29	1.12298e-28	2.87219
LLGL2	1.82407	6.66215	5.29161e-76	1.00075e-74	1.82407
LMNB1	2.50581	5.94171	1.58708e-106	5.09992e-105	2.50581
LMNTD1	1.66321	-3.40711	6.37108e-07	1.10327e-06	1.66321
LMO7DN	-2.96215	-3.55951	1.91374e-101	5.56854e-100	2.96215
LMOD1	-2.59602	5.18307	9.36767e-192	8.87623e-190	2.59602
LMOD2	-6.93589	1.97493	1.41113e-188	1.32352e-186	6.93589
LMOD3	-5.2566	1.03253	8.41001e-282	1.9922e-279	5.2566
LMX1A	-2.36727	-1.44902	1.70103e-50	1.7707e-49	2.36727
LOC100287175	1.66848	4.92371	1.23445e-49	1.25186e-48	1.66848
LOC100287413	1.93138	2.98689	1.26063e-16	3.71375e-16	1.93138
LOC100288637	1.66826	2.44727	7.17786e-52	7.7468e-51	1.66826
LOC100509620	-5.21299	-1.37142	7.28228e-246	1.17004e-243	5.21299
LOC101928583	-2.37339	3.56598	1.22746e-97	3.33036e-96	2.37339
LOC107983965	3.55268	-1.86325	3.01227e-13	7.48591e-13	3.55268
LOC107985317	2.68742	-1.48533	3.23319e-20	1.11705e-19	2.68742
LOC158434	-1.99043	-3.20331	1.18202e-11	2.70065e-11	1.99043
LOC285556	-4.92067	-0.205396	1.93078e-105	6.07753e-104	4.92067
LOC728145	2.42565	-4.31327	7.0363e-08	1.29867e-07	2.42565
LOR	5.53379	0.62109	4.66301e-16	1.33558e-15	5.53379
LPL	-4.66895	7.12961	0	0	4.66895
LPO	2.08696	-0.298471	1.15515e-12	2.79331e-12	2.08696
LRFN1	1.6861	2.73679	1.35102e-39	1.01351e-38	1.6861
LRFN2	2.8249	-0.00527853	6.34593e-39	4.64188e-38	2.8249
LRFN5	-1.91435	0.390928	8.01581e-51	8.41524e-50	1.91435
LRG1	2.1557	5.60677	1.45467e-21	5.30766e-21	2.1557
LRP1	-1.62548	8.9258	1.12483e-87	2.60444e-86	1.62548
LRP8	1.70636	3.82064	3.23173e-34	2.018e-33	1.70636
LRRC10B	1.77956	1.83119	5.27688e-19	1.72935e-18	1.77956
LRRC15	3.87513	7.11776	2.97039e-81	6.146e-80	3.87513
LRRC2	-3.91395	0.73123	0	0	3.91395
LRRC24	2.39134	-4.27885	1.56939e-15	4.38561e-15	2.39134
LRRC26	1.62202	2.10911	6.53276e-12	1.51526e-11	1.62202
LRRC31	2.43571	2.64428	3.55115e-13	8.80141e-13	2.43571
LRRC38	-3.72106	-2.84013	1.73811e-115	6.59447e-114	3.72106
LRRC39	-2.69353	0.571227	2.87512e-201	2.88715e-199	2.69353
LRRC3B	-3.48839	-1.6117	9.21584e-100	2.59575e-98	3.48839
LRRC45	1.57737	4.86143	3.15116e-49	3.1592e-48	1.57737
LRRC46	2.16657	2.56532	1.51664e-43	1.29257e-42	2.16657
LRRC53	4.88138	-1.08001	1.39475e-12	3.35995e-12	4.88138
LRRC56	1.73404	3.3398	5.83836e-41	4.56905e-40	1.73404
LRRC70	-1.98913	-0.304725	7.328e-105	2.28715e-103	1.98913
LRRC73	2.14813	1.60142	1.77381e-42	1.4625e-41	2.14813
LRRIQ4	2.16635	-1.46261	5.84578e-19	1.91274e-18	2.16635
LRRN2	1.61864	5.01927	1.06654e-28	5.30885e-28	1.61864
LRRN3	-2.12252	1.75179	1.00009e-54	1.17324e-53	2.12252
LRRN4	1.55599	-0.44782	3.4327e-08	6.45361e-08	1.55599
LRRN4CL	-3.27882	2.05619	1.94378e-211	2.16357e-209	3.27882
LRRTM2	-1.74555	0.26415	2.44524e-32	1.41499e-31	1.74555
LRRTM3	1.6733	-2.52496	0.00032824	0.000474635	1.6733
LRRTM4	-1.71396	-2.86102	1.09035e-13	2.77001e-13	1.71396
LRTM1	2.41199	-3.85748	4.18541e-08	7.83524e-08	2.41199
LRTM2	5.59734	0.892545	7.70678e-39	5.62617e-38	5.59734
LSMEM2	-1.99757	-2.82451	1.63192e-46	1.51143e-45	1.99757
LSR	1.64335	7.2454	4.7789e-66	7.45775e-65	1.64335
LTA	1.87208	0.120471	1.49175e-24	6.22331e-24	1.87208
LTB	2.23198	3.42343	1.04988e-23	4.23734e-23	2.23198
LTBP4	-1.87245	5.9796	1.16519e-137	6.11627e-136	1.87245
LUZP2	-1.93157	1.07536	3.09279e-32	1.7858e-31	1.93157
LVRN	-5.02134	1.36907	0	0	5.02134
LY6D	1.97	3.42376	1.952e-06	3.27318e-06	1.97
LY6H	2.42792	-0.14025	4.49701e-32	2.57487e-31	2.42792
LY6L	4.07336	-3.10328	7.8399e-09	1.53175e-08	4.07336
LYPD1	2.29782	0.70245	4.53691e-40	3.44973e-39	2.29782
LYPD4	2.73461	-2.64204	1.24913e-11	2.84976e-11	2.73461
LYPD8	2.7766	-0.0312113	4.48245e-17	1.34692e-16	2.7766
LYVE1	-4.88797	3.69342	0	0	4.88797
LYZL1	1.84569	-4.08174	9.65432e-09	1.87692e-08	1.84569
LYZL2	2.68229	-2.57847	1.46236e-12	3.51914e-12	2.68229
MAB21L1	-2.65311	0.998929	2.24768e-130	1.07313e-128	2.65311
MAB21L2	2.30125	-1.62501	5.67248e-10	1.1807e-09	2.30125
MAD2L1	2.22562	4.62471	1.40315e-80	2.87109e-79	2.22562
MAEL	4.44225	1.07614	4.05933e-27	1.8888e-26	4.44225
MAG	1.6299	0.423152	1.29985e-10	2.80741e-10	1.6299
MAGEA1	7.79504	1.15747	9.76473e-25	4.11361e-24	7.79504
MAGEA10	5.49087	-0.639253	4.26676e-13	1.05284e-12	5.49087
MAGEA11	3.61721	-1.48785	5.31129e-13	1.30588e-12	3.61721
MAGEA12	8.05455	0.888733	1.78926e-21	6.49767e-21	8.05455
MAGEA3	7.65086	2.07487	3.81604e-16	1.09861e-15	7.65086
MAGEA4	5.89554	2.12723	3.85908e-12	9.06025e-12	5.89554
MAGEA6	6.98025	1.89061	4.57197e-14	1.18447e-13	6.98025
MAGEA8	2.65938	-0.534007	4.60333e-15	1.25377e-14	2.65938
MAGEA9	3.53388	-4.02318	2.02697e-08	3.86545e-08	3.53388
MAGEA9B	3.61324	-2.61448	1.03452e-06	1.76483e-06	3.61324
MAGEB1	2.51576	-2.14407	2.98456e-06	4.94152e-06	2.51576
MAGEB10	2.83686	-4.28048	1.16661e-07	2.12285e-07	2.83686
MAGEB16	4.36578	-3.30197	2.91315e-10	6.15791e-10	4.36578
MAGEB17	1.58049	-0.247057	3.45402e-09	6.88903e-09	1.58049
MAGEB2	3.67067	-1.43776	2.32917e-09	4.68497e-09	3.67067
MAGEB6	2.2445	-4.26939	9.09427e-07	1.55718e-06	2.2445
MAGEC1	4.07831	-0.318477	2.89531e-14	7.57744e-14	4.07831
MAGEC2	6.6752	0.264917	5.30734e-17	1.58911e-16	6.6752
MAL2	1.71991	8.31804	1.26903e-49	1.28623e-48	1.71991
MALRD1	3.07275	2.71612	9.98221e-18	3.09777e-17	3.07275
MAMDC2	-2.98595	3.28809	1.47335e-169	1.13904e-167	2.98595
MAML2	-1.80315	5.05104	2.65239e-86	5.99122e-85	1.80315
MANEAL	1.67041	4.39688	1.04991e-41	8.43444e-41	1.67041
MAOA	-3.24842	5.59182	1.49781e-141	8.36103e-140	3.24842
MAP1LC3C	-3.68458	0.132901	4.94634e-224	6.30301e-222	3.68458
MAP3K19	2.18018	-0.950303	3.52886e-17	1.06575e-16	2.18018
MAP7D3	-1.84309	3.52669	7.75391e-107	2.52234e-105	1.84309
MAPK10	-1.96836	3.27267	6.68239e-62	9.38939e-61	1.96836
MAPK15	2.75889	4.04141	1.78779e-38	1.29136e-37	2.75889
MAPK8IP2	2.78958	5.06586	3.40346e-51	3.61457e-50	2.78958
MARC1	-2.67859	4.76985	1.73508e-213	2.02905e-211	2.67859
MARCKSL1	1.52192	8.55887	4.10192e-71	7.03071e-70	1.52192
MARCO	-1.52384	2.9989	1.49843e-14	3.97909e-14	1.52384
MAS1L	-2.13233	-3.02467	6.72685e-38	4.75304e-37	2.13233
MASP1	-3.54162	0.561644	1.605e-139	8.67121e-138	3.54162
MAST1	2.11237	1.05134	4.64077e-26	2.06124e-25	2.11237
MAT1A	1.7658	1.61817	1.0042e-11	2.30293e-11	1.7658
MATN2	-2.48162	5.63666	6.55856e-111	2.26934e-109	2.48162
MATN3	2.89528	4.7249	1.45103e-59	1.91916e-58	2.89528
MB	-3.22454	5.74685	4.97699e-156	3.26099e-154	3.22454
MBOAT2	1.50018	6.49858	2.66631e-40	2.04336e-39	1.50018
MBOAT7	1.50177	7.00984	7.27981e-72	1.27376e-70	1.50177
MC5R	2.6086	-2.8798	9.92174e-13	2.41121e-12	2.6086
MCIDAS	2.75557	0.98992	6.2678e-25	2.66598e-24	2.75557
MCM10	3.18688	3.79956	1.36656e-76	2.59773e-75	3.18688
MCM2	1.85327	6.07335	8.53281e-68	1.37575e-66	1.85327
MCM4	1.85527	7.18423	4.28295e-66	6.6951e-65	1.85527
MDGA2	1.92106	-1.52301	1.89806e-07	3.40655e-07	1.92106
MDK	1.51152	7.50353	3.06173e-28	1.49542e-27	1.51152
ME1	-1.54726	4.7025	4.67429e-36	3.10672e-35	1.54726
MEDAG	-2.3201	3.57883	4.10848e-105	1.28883e-103	2.3201
MELK	3.68261	4.36514	8.34647e-107	2.69611e-105	3.68261
MEOX1	-2.62288	3.00988	9.67615e-91	2.32795e-89	2.62288
MEOX2	-2.68041	2.82571	2.68412e-118	1.05892e-116	2.68041
MEPE	4.06643	0.119021	1.97941e-16	5.76778e-16	4.06643
MESP2	1.56231	1.25413	6.0139e-17	1.79572e-16	1.56231
MEST	-1.56843	5.93011	5.46297e-53	6.04789e-52	1.56843
METRN	2.45314	5.81203	9.07212e-49	8.98315e-48	2.45314
METTL11B	5.1792	-2.06971	2.27687e-66	3.59263e-65	5.1792
METTL21C	-3.00168	-3.83855	2.65753e-44	2.30207e-43	3.00168
METTL7A	-1.69855	6.47053	3.17205e-137	1.66034e-135	1.69855
MEX3A	2.10243	5.65597	3.52906e-36	2.35148e-35	2.10243
MFAP2	2.40026	5.44103	2.25684e-68	3.67074e-67	2.40026
MFAP4	-2.41765	6.30121	3.20275e-95	8.31139e-94	2.41765
MFAP5	-1.91483	5.99873	9.91245e-64	1.46639e-62	1.91483
MFSD3	1.70627	4.91946	5.78168e-47	5.44209e-46	1.70627
MGAM2	-1.55106	2.22472	8.38081e-12	1.93155e-11	1.55106
MGARP	-1.76923	-0.811335	1.62023e-40	1.24998e-39	1.76923
MGAT5B	2.23157	1.67923	3.13318e-21	1.12411e-20	2.23157
MGLL	-2.16735	6.82483	3.91916e-129	1.83793e-127	2.16735
MIA2	-1.76986	-4.1117	2.55665e-14	6.7063e-14	1.76986
MICAL2	1.55643	6.6964	3.67646e-59	4.8007e-58	1.55643
MICU3	-2.18242	1.33124	2.7808e-129	1.3074e-127	2.18242
MIEN1	2.10515	6.53025	6.23806e-34	3.84202e-33	2.10515
MIF	1.67361	5.34136	5.76602e-38	4.08351e-37	1.67361
MIOX	2.24356	-2.20986	2.44114e-28	1.19737e-27	2.24356
MIR1178	2.03886	4.55232	1.92572e-85	4.2715e-84	2.03886
MIR1182	-2.44277	3.22343	4.47893e-120	1.84726e-118	2.44277
MIR1199	1.58963	3.84904	6.18812e-33	3.68475e-32	1.58963
MIR147B	1.9414	4.83588	4.60265e-27	2.1373e-26	1.9414
MIR3615	1.93184	8.5013	5.20914e-46	4.75305e-45	1.93184
MIR3917	1.83586	7.7253	1.96761e-56	2.40446e-55	1.83586
MIR4260	-1.52433	6.33306	2.32815e-30	1.24507e-29	1.52433
MIR4321	2.77116	1.18411	1.45966e-32	8.54298e-32	2.77116
MIR4793	2.54733	3.9798	1.53854e-48	1.51533e-47	2.54733
MIR5572	2.09671	6.11364	7.02504e-35	4.47438e-34	2.09671
MIR614	2.42952	8.41424	4.07142e-55	4.80074e-54	2.42952
MIR6717	-2.15251	6.89807	3.39609e-111	1.18619e-109	2.15251
MIR6756	-2.1233	7.22713	2.85014e-200	2.81615e-198	2.1233
MIR6787	2.29355	5.53744	4.77256e-56	5.76733e-55	2.29355
MIR6847	1.57702	4.74185	1.46727e-43	1.25107e-42	1.57702
MIR6883	-2.00232	5.68834	6.55243e-109	2.20126e-107	2.00232
MIR7112	1.61629	6.05228	5.8136e-42	4.70718e-41	1.61629
MIR7855	-2.69737	1.62434	2.60465e-138	1.37503e-136	2.69737
MIR936	-2.77676	5.98214	4.24941e-66	6.6483e-65	2.77676
MISP	3.31215	5.39585	1.23568e-56	1.51605e-55	3.31215
MKI67	3.13609	6.67233	1.40678e-93	3.54129e-92	3.13609
MKRN3	2.90034	0.59308	1.2107e-17	3.73957e-17	2.90034
MLC1	2.46727	1.60159	1.35556e-14	3.60437e-14	2.46727
MLIP	-3.71511	-0.103554	6.98673e-147	4.16432e-145	3.71511
MLPH	1.61644	8.3893	2.14602e-21	7.7673e-21	1.61644
MLXIPL	-3.46309	2.54224	1.39708e-173	1.12234e-171	3.46309
MMD	-2.78257	4.92275	1.21024e-293	3.33755e-291	2.78257
MME	-3.2326	5.78961	7.32859e-176	6.01824e-174	3.2326
MMP1	6.55932	5.08196	9.34973e-65	1.41255e-63	6.55932
MMP10	3.14894	2.38522	2.91097e-28	1.42329e-27	3.14894
MMP11	6.31299	8.22534	1.88818e-165	1.40677e-163	6.31299
MMP12	2.54821	2.8141	5.78878e-18	1.81287e-17	2.54821
MMP13	6.33736	4.98095	1.1193e-79	2.24553e-78	6.33736
MMP26	2.11481	-4.0113	4.53094e-05	6.93951e-05	2.11481
MMP27	-2.57742	-1.54602	3.45011e-71	5.9245e-70	2.57742
MMP28	-1.93834	2.5001	1.74111e-81	3.61466e-80	1.93834
MMP3	2.3522	3.8864	3.05057e-29	1.55705e-28	2.3522
MMP9	3.40225	7.36398	5.14057e-35	3.29342e-34	3.40225
MMRN1	-3.28348	3.49702	1.03972e-140	5.73461e-139	3.28348
MMRN2	-1.85181	5.46331	6.23061e-140	3.406e-138	1.85181
MND1	2.74156	2.00737	1.5829e-72	2.80953e-71	2.74156
MNX1	3.24271	0.85544	1.41031e-30	7.60826e-30	3.24271
MOCS1	-2.10714	4.32857	1.07578e-216	1.31637e-214	2.10714
MOG	2.69015	-1.22849	2.58406e-09	5.18356e-09	2.69015
MOGAT1	-2.19287	-3.06558	8.99316e-31	4.89445e-30	2.19287
MORN3	1.67172	1.99418	6.13086e-36	4.0573e-35	1.67172
MRAP	-4.42356	0.372523	2.6367e-170	2.05562e-168	4.42356
MRAS	-2.17394	5.62005	6.7216e-140	3.66357e-138	2.17394
MRC1	-1.73994	4.1761	2.1461e-37	1.49636e-36	1.73994
MRGPRF	-1.95338	2.82372	1.31919e-87	3.04683e-86	1.95338
MRGPRX2	-3.35003	-3.52419	1.50093e-73	2.72423e-72	3.35003
MRGPRX3	-2.09448	-0.838469	2.1815e-24	9.04568e-24	2.09448
MRGPRX4	-1.54569	-4.29072	5.3783e-11	1.18756e-10	1.54569
MROH6	2.08133	3.74536	4.88797e-39	3.58963e-38	2.08133
MRPL12	1.5109	4.28019	1.47782e-30	7.95852e-30	1.5109
MRPS30	1.72435	7.06448	9.28773e-27	4.25091e-26	1.72435
MS4A15	4.25798	1.97153	3.2636e-31	1.80274e-30	4.25798
MS4A6E	-2.2284	-2.70709	2.60837e-17	7.92939e-17	2.2284
MS4A8	3.29349	1.03809	3.17769e-18	1.00607e-17	3.29349
MSLN	3.95875	4.77428	1.74649e-21	6.34858e-21	3.95875
MSMB	4.14287	4.45797	7.15914e-24	2.91365e-23	4.14287
MSRB3	-1.73962	5.63215	2.96822e-96	7.89121e-95	1.73962
MSS51	-2.04716	1.14239	2.68784e-118	1.05892e-116	2.04716
MST1R	1.5117	4.38758	4.91178e-37	3.38259e-36	1.5117
MT1B	2.32688	-4.00209	4.01222e-05	6.17164e-05	2.32688
MT1H	3.1421	-0.717981	3.29719e-20	1.13852e-19	3.1421
MT1M	-1.57605	1.78188	2.03448e-23	8.12252e-23	1.57605
MT1X	-1.53717	5.52011	4.52729e-39	3.32872e-38	1.53717
MT3	2.77047	-1.8108	4.55967e-17	1.36924e-16	2.77047
MTCL1	1.55604	4.08344	2.44644e-26	1.10224e-25	1.55604
MTFR2	2.8861	2.01578	6.98502e-88	1.61935e-86	2.8861
MTHFD2	1.52648	6.71227	2.20509e-72	3.90637e-71	1.52648
MTNR1B	2.37283	-3.46084	2.54857e-06	4.2389e-06	2.37283
MTURN	-2.50245	5.93655	4.13265e-258	7.5603e-256	2.50245
MUC1	2.59245	9.15042	3.69113e-43	3.10287e-42	2.59245
MUC13	3.13837	0.340391	5.37318e-16	1.53518e-15	3.13837
MUC21	2.58295	-0.936849	7.36207e-08	1.3569e-07	2.58295
MUC5AC	4.77594	3.2133	1.77997e-15	4.9613e-15	4.77594
MUC5B	2.91727	6.53048	3.69217e-20	1.27277e-19	2.91727
MUC6	1.68832	5.92897	1.26172e-05	2.01267e-05	1.68832
MUC7	-1.54516	0.458682	3.64838e-06	6.00973e-06	1.54516
MURC	-3.12336	0.121379	6.11623e-159	4.15476e-157	3.12336
MUSTN1	-3.60482	-2.88765	6.14674e-159	4.16019e-157	3.60482
MX1	1.79778	7.69167	1.36537e-24	5.70511e-24	1.79778
MXD3	1.7173	3.15719	2.12896e-46	1.96487e-45	1.7173
MYADML2	-2.94868	-1.66393	5.24944e-117	2.03341e-115	2.94868
MYBL1	2.2021	4.25768	6.12051e-37	4.1978e-36	2.2021
MYBL2	3.89394	5.84928	5.19049e-82	1.08983e-80	3.89394
MYBPC1	-3.34021	6.48754	1.63883e-45	1.47567e-44	3.34021
MYBPC2	-5.85062	2.15102	1.12895e-268	2.34377e-266	5.85062
MYBPH	-2.34161	-0.970109	1.65843e-49	1.67722e-48	2.34161
MYCN	1.77717	1.55104	3.95588e-17	1.1918e-16	1.77717
MYCT1	-1.90624	3.57397	1.9474e-144	1.13151e-142	1.90624
MYEOV	-1.66929	3.07175	4.21281e-18	1.32697e-17	1.66929
MYF6	-4.25955	-0.573005	4.39941e-43	3.68653e-42	4.25955
MYH1	-4.14511	1.5294	9.68504e-122	4.08563e-120	4.14511
MYH11	-3.14624	6.98605	1.06868e-151	6.60399e-150	3.14624
MYH6	-3.69584	-2.33578	7.78912e-71	1.32279e-69	3.69584
MYH7	-7.98112	5.69646	7.91419e-151	4.84207e-149	7.98112
MYH8	-1.60465	-1.45195	9.51436e-24	3.8476e-23	1.60465
MYL1	-7.89966	3.74971	4.30697e-72	7.57183e-71	7.89966
MYL2	-8.16053	4.25408	1.41512e-205	1.50272e-203	8.16053
MYL3	-6.1745	1.75494	0	0	6.1745
MYLK	-2.1568	7.39133	1.66076e-127	7.57675e-126	2.1568
MYLK2	-4.44302	0.535181	9.24769e-256	1.67519e-253	4.44302
MYLK3	-1.66484	-0.354459	3.14407e-30	1.67463e-29	1.66484
MYLPF	-7.07971	2.57783	0	0	7.07971
MYO16	-1.59347	0.795816	5.72414e-27	2.64478e-26	1.59347
MYO18B	-2.82298	0.987394	3.76803e-62	5.35141e-61	2.82298
MYO3B	3.37716	2.62769	1.51254e-24	6.30576e-24	3.37716
MYOC	-3.74018	2.34997	1.295e-42	1.07155e-41	3.74018
MYOCD	-2.24446	0.24913	1.98916e-61	2.75515e-60	2.24446
MYOD1	-3.59333	-2.93048	1.41734e-27	6.69947e-27	3.59333
MYOG	-3.33893	-1.89356	7.02063e-43	5.8538e-42	3.33893
MYOM1	-4.74629	3.33504	0	0	4.74629
MYOM2	-3.34537	3.17069	5.3271e-85	1.17038e-83	3.34537
MYOM3	-3.19821	1.54122	2.92645e-213	3.40076e-211	3.19821
MYOT	-6.00091	2.22194	0	0	6.00091
MYOZ1	-4.91099	2.76172	1.32325e-285	3.34928e-283	4.91099
MYOZ2	-4.87954	-0.443869	4.42552e-254	7.86253e-252	4.87954
MYOZ3	-1.67718	1.42172	9.03865e-32	5.11194e-31	1.67718
MYPN	-4.18498	0.998042	1.02206e-64	1.54286e-63	4.18498
MYRFL	1.80205	0.473234	5.8571e-21	2.0856e-20	1.80205
MYT1	4.55017	1.97585	2.37063e-41	1.88883e-40	4.55017
MYT1L	2.13539	-1.90918	8.25512e-09	1.61083e-08	2.13539
MYZAP	-3.16744	2.32194	1.64022e-234	2.40527e-232	3.16744
N4BP3	1.89928	5.24281	8.65843e-54	9.8511e-53	1.89928
NAA11	2.51558	-1.93483	1.21268e-05	1.93678e-05	2.51558
NAALAD2	-2.8487	0.948408	2.27488e-282	5.45883e-280	2.8487
NAP1L2	-1.52431	1.63034	1.15757e-32	6.80509e-32	1.52431
NAT1	3.2924	7.08544	4.62862e-36	3.07748e-35	3.2924
NAT14	1.79903	4.41687	1.80831e-55	2.15701e-54	1.79903
NAT16	3.33183	-2.77083	7.64774e-19	2.48737e-18	3.33183
NAT2	1.63762	0.161551	2.50952e-10	5.33032e-10	1.63762
NAT8B	1.71435	-1.76136	3.45402e-23	1.36309e-22	1.71435
NAT8L	-3.15186	4.16315	7.16438e-150	4.34021e-148	3.15186
NATD1	-1.63241	4.44263	4.29898e-136	2.21878e-134	1.63241
NBPF4	3.22809	1.14642	4.44726e-23	1.74537e-22	3.22809
NBPF6	3.16804	0.584209	1.42077e-22	5.45431e-22	3.16804
NCAM2	1.55275	4.34437	2.51463e-14	6.59982e-14	1.55275
NCAN	4.78849	2.62509	1.15724e-16	3.41352e-16	4.78849
NCAPG	3.11502	4.24175	4.69862e-102	1.38463e-100	3.11502
NCAPH	2.83715	3.98779	6.09893e-97	1.64271e-95	2.83715
NCCRP1	2.33571	4.01876	1.64468e-14	4.36119e-14	2.33571
NDC80	3.25137	3.99506	1.60054e-102	4.76987e-101	3.25137
NDN	-1.79571	4.11131	1.21462e-100	3.47407e-99	1.79571
NDP	1.99967	3.16913	1.45889e-11	3.31928e-11	1.99967
NDST4	4.70968	0.43961	2.19394e-14	5.77703e-14	4.70968
[truncated: 1,206 more rows]

## Sheet: DEmiRNA
gene	logFC	logCPM	PValue	FDR
hsa-mir-122	6.41651	3.77174	2.34485e-13	5.09482e-13
hsa-mir-1269a	5.96346	6.33594	9.27451e-22	3.15485e-21
hsa-mir-1269b	5.57257	3.67332	2.90622e-16	7.35414e-16
hsa-mir-105-2	5.53797	4.04506	1.03772e-20	3.31272e-20
hsa-mir-105-1	5.46655	4.04928	1.64055e-20	5.119e-20
hsa-mir-767	5.37437	3.64743	1.53002e-20	4.81028e-20
hsa-mir-449a	5.3271	3.74055	1.05574e-25	4.36134e-25
hsa-mir-184	4.30759	6.8346	2.63814e-23	9.68874e-23
hsa-mir-592	4.03723	2.67595	3.41687e-69	4.57419e-68
hsa-mir-449b	3.6217	1.9746	4.20987e-17	1.12716e-16
hsa-mir-4724	3.49033	1.89936	3.90787e-30	1.90796e-29
hsa-mir-190b	3.44517	4.56747	7.84956e-48	7.23904e-47
hsa-mir-3156-1	3.4424	1.6191	5.00093e-14	1.12793e-13
hsa-mir-196a-1	3.40006	8.60547	3.241e-43	2.74493e-42
hsa-mir-96	3.34754	5.40442	5.54353e-105	1.53371e-103
hsa-mir-196a-2	3.28167	8.81749	7.36393e-42	5.99222e-41
hsa-mir-3156-2	3.21601	1.62171	9.61927e-13	2.04718e-12
hsa-mir-187	3.21408	5.6298	3.59686e-24	1.38213e-23
hsa-mir-519a-1	3.17341	2.99724	1.58507e-12	3.33911e-12
hsa-mir-210	3.16548	9.39247	8.79594e-52	8.90321e-51
hsa-mir-522	3.09074	1.82759	3.51693e-11	6.88455e-11
hsa-mir-183	3.05491	14.1271	4.79355e-101	1.17019e-99
hsa-mir-1251	2.9477	2.06593	1.11204e-12	2.35457e-12
hsa-mir-4501	2.81278	1.62171	3.69964e-21	1.20894e-20
hsa-mir-429	2.78521	7.04618	1.84203e-81	3.32366e-80
hsa-mir-33b	2.69641	3.37408	5.22002e-40	4.08738e-39
hsa-mir-301b	2.68565	1.83932	1.37504e-32	7.50844e-32
hsa-mir-375	2.66777	14.8378	5.84361e-30	2.78747e-29
hsa-mir-203b	2.60061	6.05152	2.34759e-26	1.02553e-25
hsa-mir-516a-2	2.55872	1.99464	3.99448e-09	7.11464e-09
hsa-mir-7705	2.51205	1.59641	5.3073e-35	3.33716e-34
hsa-mir-516a-1	2.48992	2.05615	8.25215e-09	1.445e-08
hsa-mir-182	2.45675	15.5847	7.80729e-70	1.15715e-68
hsa-mir-7156	2.41464	1.66433	1.89279e-17	5.23672e-17
hsa-mir-937	2.41372	2.54538	3.44069e-26	1.48738e-25
hsa-mir-7-3	2.37552	1.57096	2.49665e-19	7.40079e-19
hsa-mir-135b	2.35339	4.55139	5.52922e-16	1.36115e-15
hsa-mir-141	2.3428	10.9212	9.36911e-84	1.76735e-82
hsa-mir-3065	2.322	5.99882	7.97163e-32	4.18763e-31
hsa-mir-2114	2.28253	1.59576	6.13825e-17	1.61226e-16
hsa-mir-519a-2	2.26617	1.91556	1.57283e-08	2.68611e-08
hsa-mir-147b	2.26569	1.63294	1.10243e-24	4.27577e-24
hsa-mir-760	2.26441	2.46144	5.91767e-28	2.69872e-27
hsa-mir-21	2.26436	17.9275	9.70228e-129	3.35537e-127
hsa-mir-203a	2.22658	12.7831	7.62261e-30	3.59475e-29
hsa-mir-200a	2.20611	9.91487	8.40119e-74	1.34096e-72
hsa-mir-3664	2.1859	1.55174	1.26643e-21	4.27292e-21
hsa-mir-3677	2.11875	3.89034	7.27848e-33	4.02743e-32
hsa-mir-301a	2.0727	4.40402	1.79434e-37	1.28388e-36
hsa-mir-940	2.02808	2.86641	3.54829e-30	1.77414e-29
hsa-mir-1224	1.98766	1.83121	1.13624e-11	2.30019e-11
hsa-mir-9-3	1.96249	9.89176	1.14923e-14	2.67939e-14
hsa-mir-3610	1.96229	1.65047	1.06143e-25	4.36134e-25
hsa-mir-9-1	1.95798	9.88831	1.39302e-14	3.21169e-14
hsa-mir-9-2	1.95186	9.88725	1.49698e-14	3.4323e-14
hsa-mir-4326	1.92498	3.29639	1.42565e-25	5.74411e-25
hsa-mir-142	1.91008	11.3574	1.32606e-37	9.65462e-37
hsa-mir-1301	1.90869	4.1688	3.37854e-56	3.89471e-55
hsa-mir-200b	1.80903	9.53252	5.02609e-50	4.74052e-49
hsa-mir-4638	1.78761	1.7441	3.06568e-23	1.11601e-22
hsa-mir-3150b	1.77296	2.27419	3.11029e-15	7.41821e-15
hsa-mir-877	1.71409	1.98313	1.23663e-20	3.91757e-20
hsa-mir-342	1.70338	8.99608	2.68573e-35	1.71474e-34
hsa-mir-1277	1.68688	1.7058	3.67061e-24	1.39752e-23
hsa-mir-4668	1.67092	2.74822	5.41449e-27	2.41614e-26
hsa-mir-33a	1.66485	4.40992	2.6229e-31	1.36063e-30
hsa-mir-200c	1.6495	13.5272	2.31718e-52	2.40408e-51
hsa-mir-192	1.63955	9.04968	1.77357e-42	1.47207e-41
hsa-mir-577	1.6021	3.7701	2.46581e-06	3.74839e-06
hsa-mir-3200	1.56704	2.73509	4.67788e-17	1.23651e-16
hsa-mir-508	1.56197	4.12554	1.51384e-10	2.86868e-10
hsa-mir-454	1.55114	3.73425	5.54588e-40	4.26211e-39
hsa-mir-92b	1.53999	7.03554	7.42078e-35	4.59645e-34
hsa-mir-130b	1.53444	4.69803	2.02302e-46	1.82512e-45
hsa-mir-7706	1.52507	2.04789	1.36122e-25	5.5383e-25
hsa-mir-155	1.51281	8.72522	1.22476e-33	6.96269e-33
hsa-mir-4728	1.50946	2.68327	4.42088e-11	8.61345e-11
hsa-mir-1247	-1.50166	5.60231	4.67933e-23	1.67407e-22
hsa-let-7c	-1.61098	11.5446	3.13446e-69	4.336e-68
hsa-mir-100	-1.7356	11.8714	4.67147e-85	9.23171e-84
hsa-mir-10b	-1.76906	16.4932	4.2983e-85	8.91896e-84
hsa-mir-452	-1.78037	6.05834	2.57345e-37	1.81014e-36
hsa-mir-125b-2	-1.80121	8.80848	6.91359e-115	2.20703e-113
hsa-mir-125b-1	-1.80748	8.73815	8.23664e-115	2.44158e-113
hsa-mir-378c	-1.82099	2.87222	4.83279e-90	1.05558e-88
hsa-mir-511	-1.82233	3.47465	1.30191e-69	1.86308e-68
hsa-mir-335	-1.83012	6.94731	6.89459e-72	1.05972e-70
hsa-mir-337	-1.83177	5.50935	3.84657e-80	6.65136e-79
hsa-mir-99a	-1.94767	9.85001	7.66076e-98	1.76623e-96
hsa-mir-551b	-2.07534	1.98289	1.06724e-78	1.77162e-77
hsa-mir-5683	-2.19247	4.06412	6.32889e-44	5.47186e-43
hsa-mir-1258	-2.19716	1.83538	1.15653e-65	1.45442e-64
hsa-mir-378a	-2.20611	8.57849	1.32915e-144	5.01451e-143
hsa-mir-145	-2.25636	10.859	1.23577e-199	6.41055e-198
hsa-mir-204	-2.5677	2.8597	8.60591e-69	1.11608e-67
hsa-mir-144	-2.83616	6.76864	2.52052e-104	6.5376e-103
hsa-mir-139	-2.96302	6.38915	2.17583e-281	1.80594e-279
hsa-mir-451a	-3.29305	8.82604	1.0058e-144	4.17406e-143
hsa-mir-206	-3.8091	5.87893	3.89087e-23	1.4041e-22
hsa-mir-1-1	-5.59853	4.95168	8.77363e-242	5.20151e-240
hsa-mir-1-2	-5.61336	5.03334	4.26133e-251	2.94742e-249
hsa-mir-133a-2	-6.39696	4.43777	0	0
hsa-mir-133a-1	-6.44603	4.62114	0	0
hsa-mir-133b	-6.5233	3.40014	1.35284e-186	6.23808e-185

## Sheet: DElncRNA
Supplementary Tables S1: Differential genes in BC vs non-tumor tissues.
gene	logFC	logCPM	PValue	FDR
FLJ33534	2.91423	6.17393	2.01977e-27	1.962e-26
LINC00483	1.67629	2.64745	9.10934e-14	3.72142e-13
SHANK2-AS3	2.12542	3.00969	1.94816e-08	4.92561e-08
MIR133A2	-8.34076	5.40643	1.38215e-112	1.93543e-110
MIR7-3HG	4.15572	4.78101	6.17546e-14	2.55496e-13
LINC00982	-2.10958	5.48943	1.52288e-72	7.8312e-71
LINC01561	4.92791	5.41834	4.94881e-87	3.60353e-85
SMIM10L2A	-1.89207	8.67137	6.38444e-60	2.43143e-58
LINC00670	-1.96841	2.29192	2.70786e-28	2.76002e-27
LOC541472	-2.33589	4.37058	3.05195e-62	1.23462e-60
LINC00305	5.1167	3.44442	2.10442e-13	8.30633e-13
ACTA2-AS1	-2.37704	8.45741	3.85374e-118	6.37759e-116
LINC01559	2.64154	3.95775	4.09155e-11	1.3272e-10
LINC01555	2.07561	2.9865	7.43336e-17	3.85079e-16
LOC107985579	1.59158	3.16213	1.57854e-06	3.3562e-06
LOC102723701	-1.81564	5.34154	6.89874e-70	3.39418e-68
WT1-AS	5.01494	6.65131	1.56851e-38	2.69879e-37
LOC107985578	2.24272	3.40758	4.9532e-11	1.59702e-10
UMODL1-AS1	2.12495	4.34554	2.05549e-14	8.87107e-14
LINC01405	-4.7526	4.54649	4.7718e-61	1.87211e-59
TCL6	2.92916	5.58185	1.20091e-21	8.46027e-21
LINC00176	2.62101	7.79491	2.19485e-57	7.59602e-56
LINC00238	3.24888	6.12951	9.7532e-18	5.37696e-17
GATA3-AS1	2.8028	9.89097	1.88903e-29	2.0567e-28
FAM83H-AS1	2.57505	12.4309	5.63582e-89	4.23944e-87
LOC100507175	3.53068	4.60976	7.54449e-68	3.50357e-66
LOC441178	3.27529	7.64103	3.95147e-18	2.23116e-17
BVES-AS1	-1.57901	4.01851	1.20494e-26	1.12602e-25
TDRG1	2.50772	3.29233	3.49118e-16	1.72418e-15
LOC151121	-4.65022	3.15115	3.7924e-43	7.72224e-42
LINC01257	1.55649	3.24831	0.000384826	0.000637083
ST8SIA6-AS1	3.36279	9.27595	2.24829e-27	2.18166e-26
FAM83A-AS1	2.89607	4.77993	1.95431e-17	1.05193e-16
DKFZp779M0652	-1.66588	4.47076	1.47129e-31	1.80968e-30
TTLL10-AS1	-1.85494	3.49964	3.8669e-52	1.1103e-50
LOC100129027	1.99361	3.18294	1.58984e-05	3.05548e-05
LINC01446	3.78247	4.6543	8.58006e-11	2.7079e-10
LINC00898	3.03287	4.54966	8.30511e-20	5.16347e-19
ADARB2-AS1	3.93607	5.32037	1.29574e-09	3.66725e-09
CFAP99	2.26038	6.17517	1.69425e-34	2.42088e-33
LINC00671	-2.39275	3.32607	6.72428e-74	3.5792e-72
LOC100190940	3.55899	3.85901	2.80021e-13	1.0953e-12
UCA1	2.54639	7.63261	3.12592e-17	1.65805e-16
LINC00887	1.73741	5.85704	1.7159e-21	1.19496e-20
LINC00488	2.61777	2.33629	2.94865e-08	7.31099e-08
LOC388942	1.77153	2.7841	0.000392739	0.000649121
CDIPT-AS1	2.91341	5.7275	2.72809e-37	4.458e-36
LINC00243	2.16511	6.20072	8.3761e-31	9.9012e-30
LINC01588	1.78143	8.56296	5.46655e-35	7.94832e-34
MIR99AHG	-1.77529	8.44475	1.02983e-73	5.4497e-72
LOC107985899	1.88515	5.20145	5.56594e-20	3.51326e-19
LL22NC03-75H12.2	3.96731	6.65216	1.02168e-25	9.1259e-25
PP14571	3.38929	9.55761	7.48875e-38	1.2553e-36
LL22NC03-63E9.3	2.58469	3.25075	3.59082e-12	1.26779e-11
LOC101927285	1.71023	2.67431	0.000424626	0.000698527
LINC00473	1.96001	6.87068	3.9992e-09	1.07631e-08
LMO7DN-IT1	-2.55332	2.36007	2.36894e-67	1.08899e-65
LINC01615	2.18388	6.25966	1.07481e-37	1.79502e-36
TINCR	2.88784	10.7917	8.18496e-36	1.24999e-34
SAMSN1-AS1	1.59464	2.26446	2.83013e-11	9.30966e-11
LINC01208	3.54221	6.01186	7.46332e-19	4.40825e-18
LOC105376310	4.36936	4.12821	2.05053e-14	8.85383e-14
LOC100130417	2.43629	8.95132	2.12657e-26	1.97109e-25
LGALS8-AS1	2.67228	5.92775	7.52306e-63	3.11249e-61
LOC101929697	2.64381	4.23512	1.44497e-13	5.7786e-13
LINC01226	1.5076	3.87536	2.89324e-10	8.6998e-10
LINC01014	3.14727	2.76175	9.17782e-09	2.38403e-08
SMCR2	2.95007	4.42547	1.50705e-45	3.39534e-44
LINC01441	3.44968	2.66287	5.3648e-08	1.30006e-07
LOC100129175	2.00334	4.46526	4.03305e-15	1.83544e-14
LOC102724714	1.82936	5.64313	2.88888e-23	2.25704e-22
LOC105374250	1.8062	3.35717	1.23806e-10	3.8526e-10
PHEX-AS1	-2.40683	2.72401	4.75606e-29	5.04542e-28
LINC00466	4.25511	4.52129	3.33779e-59	1.22998e-57
VSTM2A-OT1	4.39594	6.26249	5.94573e-12	2.06478e-11
LINC00403	3.19693	3.40744	1.16889e-06	2.51459e-06
LOC284930	3.38657	5.60312	1.38381e-31	1.7067e-30
LOC101927501	4.95815	4.3701	9.73607e-16	4.64941e-15
LOC643623	2.50169	2.81747	1.69798e-08	4.31825e-08
LINC01087	2.22378	9.79116	2.68651e-13	1.05173e-12
LPP-AS1	1.6882	2.14107	5.39975e-05	9.79249e-05
LOC105373537	-2.73517	2.37708	5.6546e-26	5.12121e-25
LINC01117	2.21479	6.6105	9.7073e-34	1.34484e-32
HSD52	-4.15032	3.1649	2.62239e-127	4.97271e-125
LOC284577	1.9158	3.55811	2.70649e-08	6.73994e-08
TEX26-AS1	-1.78019	3.93901	2.31077e-32	2.97912e-31
LINC01266	-1.6666	4.56961	1.73062e-20	1.13325e-19
PGM5-AS1	-3.37428	4.11164	5.34433e-93	4.67732e-91
LINC01058	-1.68741	3.85412	8.70312e-61	3.39982e-59
LOC102724849	3.87757	2.75637	2.09055e-47	5.10139e-46
OSTM1-AS1	1.70482	2.29384	4.36659e-05	8.00981e-05
LINC01297	5.42666	4.18242	4.11807e-18	2.32235e-17
LINC00113	2.24879	2.91763	3.02072e-09	8.24672e-09
LINC01594	-3.11709	2.58105	1.9349e-55	6.24519e-54
LVCAT5	1.56189	2.26599	0.00313681	0.00467364
MYT1L-AS1	3.05375	2.1976	2.42972e-07	5.56921e-07
LOC105372682	3.94879	3.4534	1.57514e-08	4.01595e-08
LOC105378732	1.57027	3.12672	6.2939e-15	2.81648e-14
P3H2-AS1	-1.69048	3.16903	2.68833e-16	1.33711e-15
LOC101927523	3.42213	6.76151	3.58502e-23	2.7842e-22
MIAT	1.78957	9.44168	3.67953e-32	4.671e-31
LINC00626	1.5702	2.93283	3.5238e-09	9.52872e-09
GS1-594A7.3	2.26615	4.1203	2.95344e-06	6.10126e-06
LINC01456	2.09371	3.97845	0.000202765	0.000345079
KCNIP2-AS1	-2.04393	4.32809	1.08586e-138	2.47088e-136
FGF13-AS1	-2.76444	4.42038	8.50364e-96	8.23406e-94
GAS1RR	-1.95858	6.72442	6.264e-95	5.87782e-93
TMEM191A	1.57395	7.77393	1.99586e-43	4.10076e-42
LINC00351	3.17602	2.24813	3.35395e-09	9.09374e-09
ST7-AS2	1.90497	3.57653	5.48959e-08	1.3296e-07
ADIPOQ-AS1	-5.07476	3.86704	2.96895e-172	1.35117e-169
SHANK2-AS1	1.58075	3.62687	1.25459e-08	3.22216e-08
LINC00974	-1.5851	2.59461	1.40809e-21	9.85879e-21
LOC102725191	1.92146	3.32461	5.7666e-12	2.00334e-11
LOC100506682	1.78171	3.32522	2.49851e-09	6.8726e-09
LOC100507600	4.17678	4.52457	4.46377e-85	3.12532e-83
LOC339529	1.58818	3.17469	3.34924e-10	1.00081e-09
LOC107985092	3.3871	6.04331	3.97361e-33	5.33449e-32
BSN-AS2	1.75734	3.66742	7.04934e-16	3.38592e-15
LOC105378591	1.9903	2.43141	1.43244e-16	7.27978e-16
LINC00511	3.1964	9.23279	8.01944e-46	1.83399e-44
IL21-AS1	2.1308	3.58149	8.96441e-15	3.98409e-14
MGAT3-AS1	-1.86397	2.88772	1.53423e-28	1.57791e-27
MIR663AHG	3.38853	3.15621	3.68068e-12	1.29801e-11
HPN-AS1	1.69045	4.6985	3.28591e-28	3.33427e-27
LOC101927139	1.99737	2.20086	5.33669e-05	9.68006e-05
LINC01537	-3.42586	5.60181	1.83241e-242	4.16965e-239
LOC101930114	-4.22782	6.26864	4.33768e-225	6.58026e-222
CERS6-AS1	1.83501	3.80233	2.7601e-31	3.35413e-30
LOC101929626	2.38703	4.96617	2.57447e-48	6.49109e-47
MRLN	-3.20608	3.09225	5.97833e-49	1.55471e-47
LOC101929771	1.88391	3.52613	3.2858e-17	1.7388e-16
LINC01429	3.60897	3.8348	4.11197e-49	1.07241e-47
RAPGEF4-AS1	-2.21168	2.74714	3.7866e-46	8.86006e-45
LOC101927787	3.17083	5.51873	4.52031e-20	2.87719e-19
LOC101929565	1.68158	3.74432	1.0391e-12	3.86982e-12
LOC101928995	2.81945	3.75569	1.05362e-24	8.91266e-24
LINC01402	-1.86316	3.32632	1.67133e-59	6.20917e-58
LOC102724188	2.59475	2.23824	9.19708e-11	2.8956e-10
PCAT6	1.89444	9.1576	8.07508e-52	2.29686e-50
TBX18-AS1	-1.73791	3.09378	8.71247e-41	1.63171e-39
LOC105377390	3.13296	2.40103	1.20714e-21	8.49103e-21
LOC105378663	-1.70856	6.06845	2.45224e-130	4.74899e-128
LOC100506405	3.20911	3.13425	3.23876e-09	8.81028e-09
HOTAIR	3.01421	9.40084	9.47938e-30	1.05093e-28
LINC00659	3.88406	3.67687	1.17826e-21	8.31356e-21
LOC101928775	3.68729	3.27027	3.16404e-15	1.45377e-14
SRGAP3-AS2	4.72006	4.83996	1.19973e-21	8.45853e-21
LINC01344	3.85886	5.7213	7.18874e-43	1.43806e-41
HCG23	-2.13101	4.08317	1.76331e-65	7.71616e-64
LOC100996635	-2.46037	7.39418	3.76997e-37	6.09489e-36
LOC101927244	1.86871	4.29941	1.61882e-17	8.76533e-17
ASTN2-AS1	1.61467	2.36693	1.20727e-06	2.59165e-06
LINC00200	3.39883	3.67762	4.85046e-09	1.29507e-08
LINC00858	3.26325	4.70392	8.65782e-11	2.73054e-10
LOC101929592	-3.67366	3.18445	9.9678e-108	1.24283e-105
LOC105373191	-1.62726	2.96928	6.89164e-36	1.0578e-34
LOC101928696	1.79284	2.63478	1.49483e-09	4.20717e-09
SACS-AS1	-2.97258	3.06536	1.17386e-93	1.06845e-91
MBNL1-AS1	-1.53866	8.56619	1.19953e-60	4.66586e-59
LINC01264	2.56205	3.11911	9.37276e-25	7.96553e-24
LINC00484	-2.82875	3.55404	2.41008e-111	3.13379e-109
LOC101929460	2.20677	3.48704	1.80233e-32	2.3402e-31
EMX2OS	-2.1269	8.09014	2.28639e-83	1.55304e-81
CASC20	2.42074	2.62248	4.00191e-09	1.07672e-08
KIF25-AS1	1.50072	5.38233	7.91177e-05	0.00014076
TPRG1-AS2	1.96147	3.54332	3.01627e-12	1.07243e-11
FEZF1-AS1	3.0407	4.86783	4.07599e-17	2.1507e-16
LOC105372566	1.88669	3.11422	1.058e-31	1.31377e-30
LOC101927795	1.54858	2.61543	5.01154e-09	1.33494e-08
VAV3-AS1	1.82198	3.50448	3.41974e-14	1.44707e-13
FOXD3-AS1	4.59118	7.81712	2.06375e-53	6.24062e-52
LOC101928307	-1.98218	3.44635	1.507e-38	2.59785e-37
LOC101927686	-1.54301	4.68193	3.69269e-35	5.41238e-34
LINC00160	1.9589	6.78815	3.71206e-21	2.5519e-20
LOC101926966	1.84046	2.34293	6.44583e-05	0.000115834
LINC01508	1.80385	5.39799	1.17451e-10	3.66613e-10
LINC01468	2.89417	5.46079	3.15995e-14	1.34025e-13
HAR1B	3.09501	5.64101	7.79731e-20	4.85771e-19
APCDD1L-AS1	-1.96077	7.79224	9.02187e-31	1.06232e-29
LINC01445	4.56453	2.94779	7.45008e-12	2.57444e-11
WASIR2	2.14252	6.55459	6.63508e-29	6.98179e-28
LINC00032	-1.84676	2.88992	1.32545e-34	1.90589e-33
KCCAT211	2.10468	7.12369	5.5155e-14	2.2892e-13
LOC100506895	-2.91651	4.52427	5.84305e-126	1.04281e-123
DLG3-AS1	2.13629	4.64622	2.35259e-32	3.02875e-31
ABCA9-AS1	-1.862	2.73264	1.16822e-27	1.15452e-26
LINC01354	-1.8161	6.23023	6.93932e-41	1.3077e-39
LINC01611	1.63086	3.32938	4.97321e-06	1.00636e-05
PCAT7	2.11912	6.32697	8.94549e-27	8.42005e-26
LINC00210	4.35397	2.76509	3.12875e-11	1.02402e-10
PGM5P4-AS1	-3.34213	2.95202	2.36903e-133	4.79176e-131
LEF1-AS1	2.61832	5.36099	1.06297e-93	9.77291e-92
LINC01063	1.64534	4.42834	1.16552e-29	1.28278e-28
LOC284825	-4.27104	6.10763	1.04581e-196	7.93244e-194
LOC101929631	5.49055	3.84848	1.36221e-11	4.6024e-11
LINC00867	2.20216	4.17893	2.53669e-10	7.67075e-10
LOC440390	2.12639	2.90264	7.7849e-09	2.03615e-08
LINC00202-1	1.70488	7.15499	2.81807e-19	1.70093e-18
GNG12-AS1	-1.54841	6.14724	4.50187e-67	2.0488e-65
LOC101927746	1.86102	7.74268	3.11049e-31	3.76486e-30
LOC105378499	2.41814	4.59583	5.61029e-13	2.13303e-12
COL4A2-AS1	-1.63022	3.17751	9.06984e-43	1.79856e-41
LOC101929413	2.84449	2.5379	1.03541e-06	2.23695e-06
PTCHD1-AS	-1.59428	2.36541	2.39953e-14	1.02973e-13
HOXB-AS3	2.79092	8.14625	1.8281e-17	9.85159e-17
TLR8-AS1	2.28526	3.0405	1.96207e-11	6.54168e-11
LOC101929297	3.93082	3.80843	1.09856e-14	4.85865e-14
LOC101929406	2.4335	2.38388	1.74816e-17	9.43576e-17
LOC100128317	2.10447	3.83671	5.38698e-11	1.73137e-10
LOC730338	3.98679	4.87512	6.93489e-17	3.60076e-16
LOC100505795	2.35327	3.69636	1.23654e-14	5.43458e-14
MYCNOS	2.30388	3.81961	1.44302e-18	8.38722e-18
LINC01136	2.05416	5.08459	3.30186e-35	4.86302e-34
KCNQ5-IT1	2.62883	2.41278	2.3528e-13	9.25464e-13
LOC105372840	1.65992	5.99217	1.2356e-10	3.84625e-10
KRTAP5-AS1	1.9958	7.56882	5.53627e-28	5.55581e-27
LINC01425	3.72417	2.70835	2.57642e-10	7.77797e-10
LOC340017	3.68447	5.59208	6.69075e-15	2.99259e-14
LOC101927412	1.62123	4.37058	2.55403e-09	7.01894e-09
LOC101927914	1.545	3.26631	5.44623e-11	1.74917e-10
DEPDC1-AS1	2.87033	3.19043	3.33328e-30	3.8115e-29
LOC729040	-2.13973	3.05592	2.24816e-50	6.20083e-49
LINC01505	3.09411	4.52597	1.97544e-27	1.92099e-26
MAGI2-AS3	-1.98275	10.2545	5.67985e-149	1.72327e-146
RHOXF1P1	2.75691	4.52002	1.89073e-09	5.26282e-09
CHL1-AS1	-2.3318	2.45234	1.24335e-40	2.30488e-39
LOC100506175	2.97154	4.06313	1.0162e-19	6.2793e-19
LINC01287	3.51791	7.10965	4.58619e-16	2.23706e-15
LOC105755953	4.17752	2.98659	4.61444e-27	4.39797e-26
C1orf140	-1.88406	2.95499	3.5564e-42	6.96137e-41
LOC101929445	-1.69733	2.59955	9.72801e-20	6.02343e-19
LOC105373958	1.92188	7.86844	1.31698e-47	3.23104e-46
LOC100507406	2.25619	2.31622	1.11867e-13	4.52339e-13
LOC148709	2.41242	5.56022	3.97796e-58	1.4368e-56
DPP10-AS1	2.36868	4.99288	2.44407e-06	5.0976e-06
LOC100505635	-2.14467	6.59412	3.37487e-107	4.1511e-105
LINC00940	2.70906	7.05941	1.97855e-31	2.41404e-30
DSCAM-AS1	5.97117	10.5072	5.36529e-26	4.86888e-25
LOC100422737	2.76679	6.16668	3.2503e-20	2.08781e-19
FAM83C-AS1	2.47586	2.99914	1.17039e-34	1.68559e-33
THRA1/BTR	2.01892	3.1629	1.61431e-09	4.52383e-09
LINC01281	3.50492	4.32993	1.54782e-34	2.21862e-33
LOC101929350	4.59838	4.42808	3.1761e-18	1.80455e-17
LURAP1L-AS1	1.50331	3.56592	3.03835e-12	1.07943e-11
AGAP1-IT1	2.83277	5.89397	3.04962e-56	1.0205e-54
LINC00494	1.96317	5.34376	1.13128e-14	4.99364e-14
LOC101929181	3.24764	2.4943	6.88975e-15	3.08008e-14
LINC00607	1.91957	7.05395	6.72164e-29	7.0647e-28
LOC101928389	1.65081	2.45682	1.88589e-06	3.97438e-06
ARHGEF7-AS2	-2.77126	2.77298	5.12634e-116	8.04481e-114
MACROD2-AS1	1.69379	2.36043	4.58269e-06	9.30232e-06
LINC00445	-3.1796	3.07288	3.94819e-75	2.17797e-73
LOC101927630	2.62668	5.17785	5.87919e-21	3.99943e-20
LOC101928335	1.50158	3.42567	2.02971e-10	6.19597e-10
ELFN1-AS1	4.40072	6.28263	1.25788e-25	1.11809e-24
LINC00545	-1.68935	2.43261	6.33639e-19	3.7548e-18
MYO16-AS1	1.84245	2.4798	4.0259e-05	7.40577e-05
LOC105373051	4.02193	4.61973	2.5089e-18	1.43713e-17
GACAT3	2.2954	3.76353	1.40464e-15	6.63123e-15
TRHDE-AS1	-5.36245	8.14822	2.89129e-231	5.26331e-228
LOC153910	2.73826	3.7094	3.93637e-10	1.1663e-09
VLDLR-AS1	-1.79705	6.48472	1.37302e-44	2.95444e-43
SIX3-AS1	3.11983	4.16005	1.30709e-13	5.25261e-13
DLX2-AS1	3.00887	3.64509	6.37227e-20	4.00279e-19
FRGCA	2.59375	3.18238	1.04923e-15	5.00003e-15
LINC01186	-2.78075	3.57154	1.61698e-51	4.55658e-50
LINC01474	-2.71627	2.71038	1.01613e-84	7.06016e-83
LOC284898	2.50879	2.27624	2.49169e-05	4.69843e-05
GLIS3-AS1	1.64601	2.70612	2.11591e-07	4.87323e-07
LOC101927164	1.63728	5.90883	6.17961e-23	4.73857e-22
HAND2-AS1	-1.67239	6.71001	6.11981e-63	2.55516e-61
LOC100129291	2.44899	3.13663	8.3414e-09	2.17546e-08
UNQ6494	2.004	4.86191	4.29026e-37	6.92375e-36
UNC5B-AS1	2.00094	5.21301	2.92249e-29	3.13685e-28
LINC01497	-3.03299	3.58637	5.30397e-38	8.95671e-37
LOC150051	2.81044	6.10147	2.49656e-57	8.60747e-56
LOC400958	1.55536	3.23387	1.13462e-12	4.20153e-12
LOC101928283	1.9549	2.37451	9.61213e-09	2.49329e-08
LOC105375014	2.45028	3.32728	1.97547e-07	4.56248e-07
LOC102723927	3.43174	10.688	1.90255e-29	2.06894e-28
ZEB2-AS1	-1.64584	4.35654	3.92577e-73	2.05358e-71
LINC01352	-1.56965	4.91415	1.37778e-51	3.89459e-50
LOC101929337	2.16218	3.20701	1.04085e-11	3.54294e-11
LINC01625	-2.78293	3.84162	8.62235e-71	4.31212e-69
LINC01589	-2.22206	4.01206	4.61761e-80	2.93913e-78
LOC100996251	-1.74057	5.32056	3.90867e-90	3.12076e-88
LINC00707	2.13485	7.39362	4.52318e-07	1.01205e-06
CLRN1-AS1	2.978	4.27837	1.63691e-29	1.79291e-28
LOC100507537	-7.77856	6.23507	2.87494e-163	1.09032e-160
ARHGEF3-AS1	1.83498	2.09556	4.16298e-06	8.48155e-06
LINC00636	-2.17966	2.77295	3.76085e-39	6.65978e-38
CDKN2B-AS1	2.3322	6.50993	6.96837e-60	2.64275e-58
LOC101243545	1.52097	3.54981	4.9223e-12	1.7179e-11
KCNAB1-AS2	1.88684	2.32589	1.14629e-08	2.949e-08
LINC01168	1.77851	2.61151	1.87959e-06	3.96479e-06
C21orf91-OT1	1.83072	3.02932	6.12415e-07	1.35437e-06
LSAMP-AS1	2.58061	2.63282	1.65486e-07	3.84346e-07
ADAMTS9-AS1	-2.6645	6.70486	2.05805e-98	2.10476e-96
LOC152225	3.48743	5.31638	6.78723e-16	3.26691e-15
SYNPR-AS1	2.22665	5.11787	3.56948e-18	2.02174e-17
ADAMTS9-AS2	-3.02742	6.45158	3.18098e-191	1.80958e-188
LINC01324	1.74206	2.24262	0.000249007	0.000420338
LOC105370757	1.59903	2.42793	1.11008e-13	4.49065e-13
LOC102546299	1.61862	2.57458	2.44588e-08	6.11772e-08
LOC644090	1.73672	3.49445	7.67591e-17	3.96516e-16
LOC105376382	2.71338	4.6266	6.03219e-46	1.39e-44
LOC100507661	-3.62424	2.55768	1.51855e-136	3.29091e-134
LINC01206	1.68826	2.67411	1.87829e-06	3.96295e-06
LINC00870	1.82304	3.93947	1.26188e-21	8.8692e-21
LOC107986046	2.46079	3.07558	1.89386e-15	8.86269e-15
MNX1-AS1	3.19167	7.13039	1.02179e-28	1.06047e-27
CACNA2D3-AS1	2.21559	2.26648	2.51271e-07	5.75163e-07
WDR86-AS1	-2.05138	6.56511	4.57975e-63	1.92096e-61
ELFN2	1.94906	2.53561	1.41209e-08	3.61442e-08
LOC105374171	-2.91398	2.43456	3.52898e-47	8.49757e-46
PEX5L-AS2	2.69005	2.23418	8.87119e-09	2.30834e-08
HDAC11-AS1	1.81198	3.05962	7.70146e-27	7.27165e-26
LINC01213	2.18536	4.9655	2.36196e-24	1.95798e-23
LOC101927657	1.70703	3.64895	1.0696e-08	2.76106e-08
LOC107986927	-1.58862	5.92045	8.02305e-113	1.15914e-110
MIR3150B	2.89355	5.77347	1.71353e-43	3.55274e-42
LOC101929595	-2.00409	3.27987	5.13006e-48	1.27579e-46
MIR9-2	3.61861	5.58842	2.94878e-19	1.77747e-18
DDX11-AS1	1.76163	6.62735	9.48031e-55	2.97551e-53
LOC101927740	-3.01187	6.50684	2.88433e-267	1.31266e-263
MIR4300HG	2.68497	3.41104	1.69838e-12	6.17111e-12
ALDH1L1-AS2	-4.87283	4.9862	2.6283e-197	2.1748e-194
LOC100507053	-1.56883	7.00999	9.16529e-86	6.51738e-84
LOC728084	-1.54201	3.76792	2.10665e-24	1.75754e-23
LINC00968	-3.54633	6.40606	1.54285e-147	4.38844e-145
LOC101927282	3.40446	2.62824	2.90885e-10	8.74385e-10
MIR210HG	1.83759	8.37354	2.58493e-37	4.23928e-36
FLJ12825	2.20268	7.04598	6.05206e-31	7.21019e-30
MEF2C-AS1	-2.0691	5.10781	3.5945e-99	3.84908e-97
LINC00613	5.2069	3.23179	2.17647e-14	9.35769e-14
LINC01197	-1.7395	6.60611	1.00738e-75	5.62526e-74
LOC101928851	2.60824	2.29782	1.08007e-09	3.08079e-09
LOC101929128	4.29497	7.20308	1.08978e-20	7.22972e-20
LOC643201	2.83094	5.01472	4.59653e-17	2.41278e-16
OXCT1-AS1	-2.06673	5.11499	1.08863e-111	1.45716e-109
LOC102467212	1.58709	4.52346	2.90931e-06	6.0142e-06
LOC105378960	3.92018	2.70817	2.82654e-08	7.02353e-08
LINC01574	3.49915	2.79747	1.21236e-10	3.77648e-10
C5orf17	1.75657	5.58475	1.75225e-06	3.70907e-06
LOC101929470	1.83192	3.54291	5.5389e-12	1.92571e-11
C5orf66-AS1	5.98073	6.16664	1.39732e-45	3.15593e-44
LOC283352	3.49892	2.50709	7.59163e-09	1.98732e-08
CTD-3080P12.3	-1.59181	2.60072	5.14401e-20	3.25596e-19
CASC16	4.31165	6.36258	4.79574e-26	4.36946e-25
LINC01411	2.29621	7.50687	3.24319e-12	1.14817e-11
LINC01016	1.6547	8.84493	1.11769e-07	2.63554e-07
ADAMTS19-AS1	2.53912	4.45358	1.68486e-18	9.74304e-18
LINC01091	-1.691	5.54085	1.56308e-52	4.55999e-51
LINC01470	2.33241	2.68658	5.16358e-10	1.51707e-09
LINC01586	-3.15222	2.56998	2.17529e-93	1.94113e-91
LINC01179	2.23873	2.26148	2.07981e-08	5.24389e-08
LINC01234	2.98507	4.88552	1.82195e-13	7.23851e-13
LOC442497	-1.75174	4.73637	5.8406e-24	4.74229e-23
C5orf66-AS2	2.44309	2.11895	5.57069e-13	2.11886e-12
MIR143	-3.29828	8.75244	2.56841e-197	2.1748e-194
LOC729558	2.87682	3.08768	4.20539e-12	1.47278e-11
LOC574538	-1.87864	3.6414	5.18455e-31	6.19288e-30
LOC285692	2.10894	2.39583	1.16951e-12	4.32192e-12
MIR1204	1.70931	10.8314	4.86938e-48	1.21428e-46
LOC100288866	-1.7045	2.81391	2.86562e-33	3.89297e-32
LINC00536	2.85189	6.41963	1.04391e-33	1.44402e-32
BFSP2-AS1	1.81804	4.60975	7.33766e-11	2.32952e-10
SLC7A11-AS1	1.96822	3.71819	1.21352e-14	5.34371e-14
LINC00603	-1.93281	2.34817	2.1895e-21	1.52012e-20
LOC101927359	2.95103	4.61161	2.01631e-11	6.70776e-11
CTD-2350J17.1	1.86485	2.30159	3.23557e-05	6.02746e-05
MGC32805	1.79393	4.63842	2.96292e-08	7.34437e-08
LINC01340	-2.10639	2.48667	1.5264e-41	2.93728e-40
LINC00989	-1.94869	4.51958	1.42811e-81	9.28476e-80
LOC102724392	3.7629	4.93083	1.28428e-12	4.71732e-12
LOC107986321	-3.23017	5.93997	1.13886e-28	1.17661e-27
LOC101928978	4.03273	4.52702	7.94264e-18	4.40548e-17
LOC100506272	2.08032	3.54365	1.56756e-07	3.65003e-07
TMEM108-AS1	2.07384	2.29096	8.79338e-07	1.9134e-06
LOC102467213	1.65647	2.89163	0.000201792	0.000343568
LOC340074	2.06979	2.43164	3.64887e-08	8.96653e-08
LOC102723828	4.04769	5.59689	4.12642e-12	1.44735e-11
LOC100507377	3.39225	3.69682	1.09468e-11	3.71783e-11
HOXC-AS3	3.68452	6.93341	1.96472e-40	3.6127e-39
F11-AS1	1.74581	2.96798	0.000127155	0.000221125
LINC00589	1.68469	5.70945	1.09454e-08	2.82224e-08
LVCAT1	3.08576	5.30899	1.32747e-13	5.3298e-13
LINC00605	1.96533	4.88964	3.21271e-19	1.93145e-18
LOC101927379	2.66338	3.13909	9.97332e-24	7.98392e-23
LOC105379109	2.43921	2.83364	5.98478e-11	1.91673e-10
LINC01267	-1.79595	2.93891	1.84906e-35	2.77268e-34
LOC105377443	-1.70412	3.01077	3.40023e-29	3.6325e-28
LINC01606	3.90172	5.34167	9.73243e-13	3.632e-12
LOC105379374	2.89715	2.72594	2.04281e-06	4.28722e-06
LOC105379391	2.04512	2.55529	9.00443e-08	2.14158e-07
LOC285629	2.39415	4.85322	1.60103e-12	5.83371e-12
LOC105377736	-3.23287	2.21181	4.77734e-99	4.99809e-97
LOC101929450	2.11039	5.33873	3.43229e-15	1.57305e-14
HPYR1	2.18425	2.56035	2.57578e-15	1.19069e-14
LOC102724623	3.04533	2.4733	7.51905e-10	2.17196e-09
LOC101927822	2.15109	2.36186	1.08912e-15	5.17661e-15
CTD-2270F17.1	-2.2166	2.70065	6.82996e-43	1.3693e-41
LINC01592	2.191	2.88531	1.88674e-16	9.47745e-16
LINC01484	-1.91892	4.7662	6.51641e-36	1.00529e-34
LINC01151	2.52988	3.37347	2.64956e-06	5.50349e-06
FER1L6-AS2	4.01688	3.23819	1.26549e-13	5.09218e-13
LINC01608	4.01062	3.40415	2.13934e-08	5.38206e-08
LINC01419	6.78661	5.35037	6.1293e-13	2.3226e-12
LOC101927392	-1.521	2.8205	2.15701e-25	1.89144e-24
LOC100130964	3.21452	2.26987	1.59282e-08	4.05989e-08
RBPMS-AS1	-1.88236	6.31439	1.76617e-105	2.06098e-103
LOC286178	-1.7887	2.73479	9.35131e-27	8.79293e-26
LOC105375624	1.57774	8.3885	3.76331e-23	2.91486e-22
LVCAT8	1.61619	2.60926	3.20369e-10	9.60475e-10
LOC101929415	-3.23745	2.95385	8.10517e-67	3.67031e-65
LINC01111	2.93356	2.74809	4.41386e-06	8.97363e-06
MAFA-AS1	3.88103	3.90947	2.37822e-31	2.89393e-30
HOXA-AS3	-1.57781	5.5635	3.38101e-30	3.86122e-29
RHPN1-AS1	2.13237	8.98995	1.44706e-70	7.19735e-69
LOC105369486	3.03959	3.92919	9.36828e-11	2.94746e-10
LOC101929427	2.24798	5.00052	4.53318e-09	1.21249e-08
LOC221122	3.0288	2.91139	6.35266e-33	8.41657e-32
LOC102724301	1.75735	5.83529	5.85071e-46	1.3516e-44
LOC105376671	-2.92401	4.0496	1.46962e-191	8.91766e-189
LOC283299	-2.76237	4.26963	6.77932e-58	2.41982e-56
LOC105375800	2.37181	7.34808	6.14886e-66	2.73009e-64
LOC100128233	1.80992	2.3953	1.14656e-12	4.24228e-12
LOC101928896	-1.66133	2.75442	2.21145e-18	1.27235e-17
LOC101928944	2.44067	3.70453	6.94402e-18	3.86809e-17
TMPRSS4-AS1	-1.5839	2.28611	4.32683e-16	2.11622e-15
C8orf49	4.05509	3.08327	1.03335e-14	4.58138e-14
LOC100132078	1.68072	3.14281	0.000429458	0.000705583
LOC101927120	2.23829	2.43754	1.63056e-06	3.46097e-06
LOC101927531	-2.04053	2.41855	1.11129e-16	5.69858e-16
LOC440084	1.85837	2.73966	1.39839e-06	2.98362e-06
TMEM5-AS1	-1.5551	2.98761	4.95302e-41	9.37264e-40
CACNA1C-AS4	1.80258	2.52216	8.48295e-05	0.000150452
LOC101928471	1.58049	2.06292	0.000907884	0.00143514
LINC01152	-2.08746	7.97849	3.13099e-29	3.3488e-28
LOC105369507	2.12309	2.17275	2.09537e-05	3.97915e-05
LOC101928441	2.72455	2.8411	8.22873e-09	2.14792e-08
MRGPRF-AS1	-2.85667	3.06836	2.34456e-118	3.95189e-116
LOC100130111	1.69306	4.54208	8.74814e-22	6.2062e-21
LOC105369340	2.05478	6.92001	4.36673e-40	7.98111e-39
C11orf97	2.338	2.55543	1.09182e-07	2.57722e-07
LOC105369635	1.53111	8.46584	1.51389e-31	1.85957e-30
LOC105369739	1.80085	3.48161	1.19709e-13	4.8319e-13
TMPO-AS1	2.06497	8.23118	2.94236e-78	1.73905e-76
LOC102724890	2.52883	2.77361	6.11892e-07	1.35378e-06
LOC105369848	-1.59327	5.14959	1.7478e-48	4.44372e-47
LOC101927653	-1.87391	2.62216	1.36628e-29	1.5001e-28
LINC01475	3.14353	2.31413	8.07793e-11	2.55474e-10
LOC100506125	1.87962	4.87276	9.08378e-40	1.64049e-38
LINC01490	3.6179	2.87169	2.59141e-08	6.47107e-08
NOVA1-AS1	2.72991	3.91393	7.25098e-09	1.90197e-08
LOC101929058	3.3947	2.47154	7.00328e-08	1.68234e-07
LOC105369900	2.62571	2.26067	2.22136e-08	5.58068e-08
LOC102724917	1.93096	2.80096	0.000124293	0.000216519
LOC105369736	3.21111	2.47267	1.66827e-09	4.66501e-09
LOC100506869	-2.40607	2.77321	2.59142e-46	6.09487e-45
LINC00640	-2.07241	4.53071	1.46422e-58	5.33094e-57
MIR1247	-1.61574	7.27824	4.38042e-31	5.26692e-30
LOC101929002	2.10743	2.69521	4.52091e-07	1.01178e-06
RHOXF1-AS1	-3.03214	7.43647	1.244e-105	1.48985e-103
LINC00645	-3.87159	3.14829	1.83902e-58	6.66881e-57
CRAT37	2.91953	4.83747	1.93974e-15	9.05752e-15
FAM181A-AS1	-1.51176	2.33717	3.85303e-11	1.25251e-10
LINC01193	2.21884	2.56757	3.50872e-05	6.50436e-05
LOC102724190	-1.91684	5.22017	9.22003e-76	5.18029e-74
LOC105370623	2.50899	4.72405	1.24588e-38	2.16412e-37
LOC107985816	3.09808	7.22378	4.88978e-15	2.21424e-14
LINC00524	2.63172	3.06273	5.62341e-15	2.53137e-14
LOC105370400	1.53242	3.35428	2.30858e-11	7.65212e-11
LOC105373580	6.49374	6.88875	3.33538e-14	1.41334e-13
LINC00924	-2.11944	5.80483	2.92141e-83	1.96968e-81
LOC101929586	2.78492	2.70252	9.67786e-21	6.45332e-20
LOC102723493	-5.23585	4.49595	1.44235e-216	1.87546e-213
LOC101929457	1.80424	4.81348	7.05857e-15	3.15246e-14
LOC101928134	-1.94233	2.92682	3.84178e-14	1.61813e-13
MGC15885	-1.58254	2.50215	5.32939e-14	2.21599e-13
LINC01583	1.98033	2.54362	1.26735e-12	4.66267e-12
LINC00052	6.0826	9.02948	9.09694e-21	6.08379e-20
PCAT29	2.39007	6.11275	7.47621e-29	7.83968e-28
LOC101927286	-2.03842	2.29252	2.54228e-16	1.26586e-15
LINC00593	2.79962	4.56765	8.57515e-24	6.90717e-23
PCSK6-AS1	1.5784	2.2039	2.36425e-08	5.92167e-08
PWRN1	-2.18202	2.30238	3.922e-16	1.9265e-15
LINC00261	5.47087	5.34528	2.53792e-10	7.67191e-10
LOC105447648	2.24489	4.37845	2.51804e-19	1.52388e-18
LOC101929224	1.648	5.17537	4.90706e-17	2.5669e-16
LINC00564	4.72113	3.26366	1.42031e-09	4.00611e-09
LOC101928707	1.95933	8.91522	9.3499e-54	2.8558e-52
LOC102724163	1.70013	8.08095	1.31612e-21	9.22906e-21
LOC101927272	1.75151	4.9511	7.49001e-22	5.33861e-21
LOC105371184	1.66763	3.96436	4.94519e-20	3.1323e-19
ATP2A1-AS1	2.37269	6.25824	1.10844e-57	3.9257e-56
LOC101929634	2.10095	4.56549	1.82752e-23	1.44268e-22
FBXL19-AS1	1.53492	9.00079	9.71989e-41	1.80552e-39
GS1-120K12.4	3.54728	2.61089	8.01114e-11	2.5345e-10
LOC101929504	3.91469	8.01096	2.76832e-87	2.03204e-85
WFDC21P	3.35158	8.06908	1.89829e-36	3.01015e-35
LOC105371156	2.96423	2.81426	2.65869e-12	9.49368e-12
LINC00563	1.71301	2.79468	7.63487e-11	2.4205e-10
FLJ26245	4.37555	4.70242	3.40141e-08	8.39242e-08
LOC105370941	1.51693	6.29918	7.25622e-31	8.6222e-30
PYCARD-AS1	1.87911	3.9729	1.21603e-32	1.59716e-31
MAFTRR	-1.77939	4.92914	1.07249e-64	4.64848e-63
LOC100288748	1.96317	8.25858	1.80482e-52	5.23168e-51
SSTR5-AS1	5.49695	5.01034	6.10181e-22	4.38002e-21
LINC00922	4.77957	6.67969	4.38836e-96	4.29493e-94
LOC100508631	3.71065	3.71997	9.68563e-08	2.29779e-07
LOC102723373	1.56223	6.09056	4.61498e-16	2.24989e-15
LOC101927580	2.55972	2.58095	9.48726e-07	2.05705e-06
LOC101927311	-2.66994	4.31392	1.68293e-146	4.64182e-144
BCAR4	4.8621	5.39385	2.51845e-22	1.86365e-21
LOC101929726	-3.24927	6.2116	1.97566e-171	8.56307e-169
LOC101928738	2.35143	4.59504	2.83324e-33	3.85473e-32
LOC105371919	2.14779	8.36891	1.30995e-32	1.71063e-31
LOC105371426	2.46595	5.07971	1.73184e-12	6.29017e-12
LOC101928266	1.66638	5.10917	9.46757e-19	5.5596e-18
LOC105371083	1.92612	3.95103	3.34861e-34	4.69631e-33
LOC102724940	1.9939	3.83982	2.04482e-07	4.71665e-07
TMEM220-AS1	-1.79854	5.89013	1.90443e-92	1.65086e-90
LOC101927539	1.83233	3.07858	2.12565e-12	7.65638e-12
HID1-AS1	-1.95712	4.68803	1.00362e-97	1.01499e-95
LOC400655	2.34133	4.95742	8.83788e-07	1.92262e-06
LOC105371907	2.01371	3.70535	5.69097e-24	4.62493e-23
DLGAP1-AS3	2.81832	3.0636	1.42712e-10	4.40925e-10
LOC146795	2.80071	2.52658	4.47425e-11	1.44721e-10
LOC105372038	-2.41923	2.4458	1.32966e-20	8.76994e-20
LOC105376854	2.97586	2.40576	5.00144e-08	1.21525e-07
LOC101928144	2.6209	2.32511	1.09116e-08	2.81431e-08
MAPT-AS1	2.0838	6.68764	3.33798e-11	1.08897e-10
LOC101928947	-1.57779	5.07102	3.28707e-34	4.61712e-33
MIR133A1HG	-4.39134	5.13923	8.21417e-146	2.19898e-143
MAFG-AS1	2.03141	9.65962	3.61337e-69	1.74941e-67
CXADRP3	5.17771	7.47082	2.35674e-24	1.95543e-23
LINC00668	4.94759	8.19873	2.14957e-14	9.26392e-14
GACAT2	3.57565	5.53554	4.73292e-18	2.66084e-17
LOC101927557	1.54756	2.25424	1.74093e-05	3.33319e-05
SNHG25	2.09207	5.84266	2.10728e-41	4.02107e-40
LOC101928674	2.25792	6.3236	3.28193e-45	7.28587e-44
LOC102724908	2.18081	2.34708	3.47637e-07	7.84966e-07
LOC101927229	3.80864	7.66088	3.68675e-51	1.02935e-49
LINC01532	-2.29961	2.47042	8.23424e-30	9.20737e-29
LOC101928710	2.10423	3.89625	5.79849e-26	5.24631e-25
RNF157-AS1	1.52764	5.91153	2.33649e-24	1.94217e-23
LOC284294	3.51492	3.87768	3.67086e-11	1.19457e-10
LOC101928845	3.52131	5.45995	3.76339e-33	5.06722e-32
LOC101928602	2.41377	3.74059	2.51193e-44	5.34196e-43
LINC01140	-2.14227	7.79408	1.21721e-106	1.4772e-104
LINC00906	-2.72349	2.32191	4.0739e-52	1.16606e-50
KCNJ2-AS1	-1.86474	5.81838	4.04309e-74	2.16472e-72
MIR924HG	1.65633	7.15965	3.64052e-24	2.99332e-23
MIR497HG	-1.74319	7.17254	1.6242e-105	1.91993e-103
LINC01028	-3.74484	3.62345	3.71218e-62	1.49506e-60
LOC100996324	1.67253	3.13372	3.49955e-08	8.62055e-08
LOC101928844	2.11744	3.7869	1.12964e-11	3.83084e-11
LOC105372233	2.77609	7.63878	2.62144e-61	1.03741e-59
MIMT1	1.71703	4.31151	2.53838e-08	6.34211e-08
LOC101928295	2.09326	7.81516	7.10802e-20	4.44044e-19
SCGB1B2P	2.52212	9.71532	7.67313e-13	2.89196e-12
LOC79160	1.76745	6.3243	2.32655e-35	3.48294e-34
ZNF350-AS1	2.35696	6.99908	1.6129e-21	1.12495e-20
LINC01224	4.10528	7.16022	3.92895e-32	4.98068e-31
PLA2G4C-AS1	2.1752	4.2769	1.0554e-31	1.31233e-30
RMRP	4.43095	4.46936	1.03314e-10	3.24151e-10
SCARNA2	2.38228	2.24764	8.80576e-10	2.52839e-09
LINC00221	4.43337	5.50952	7.32289e-13	2.76339e-12
LINC01050	2.69933	3.65618	2.98941e-24	2.46911e-23
LOC101926940	-2.31955	4.10485	5.45314e-89	4.13621e-87
LOC389332	3.63885	4.09495	1.60683e-17	8.70557e-17
FGF14-AS2	-1.85821	7.21569	4.61079e-76	2.60667e-74
LOC105379695	1.59773	5.05877	1.71121e-34	2.43747e-33
AFAP1-AS1	3.96844	9.13712	1.54861e-25	1.36982e-24
LOC105373098	3.33764	7.6689	3.84549e-47	9.21097e-46
DGCR9	1.53605	5.40699	2.86295e-16	1.42319e-15
RBAKDN	2.88741	3.2221	1.58616e-17	8.60382e-17
LOC101929497	-1.62443	4.08154	1.52532e-24	1.28313e-23
AGBL1	-6.10041	3.29103	2.3874e-78	1.42027e-76
FLJ16779	1.83109	5.26509	1.02024e-12	3.80115e-12
LOC400661	2.75266	2.60101	9.94009e-13	3.70646e-12
FLJ36000	3.51032	2.56374	4.96033e-09	1.32208e-08
LOC101927697	-2.6008	2.89363	2.91297e-76	1.65712e-74
LOC100287808	2.12774	7.48013	3.30233e-40	6.04785e-39
LOC102723471	5.24963	4.89949	2.16466e-16	1.08257e-15
LOC101929698	2.0497	4.68442	4.46812e-30	5.05203e-29
LOC101929163	-1.80362	2.24809	1.8709e-31	2.28577e-30
LOC101927815	-1.87537	2.32555	5.49415e-21	3.74871e-20
PGM5P3-AS1	-3.50618	3.31768	8.31403e-144	2.10206e-141
LOC105371267	-2.53197	8.09386	1.11185e-72	5.75004e-71
NKILA	1.57843	8.78057	2.41656e-36	3.81205e-35
FAM230C	5.19132	3.60826	6.35776e-14	2.6268e-13
MIR3911	-1.77898	2.91125	1.36198e-63	5.76593e-62
MAPT-IT1	2.43635	6.5607	3.61501e-16	1.78341e-15
MGC39584	1.95421	5.68573	0.000250293	0.000422273
KCNIP4-IT1	2.49067	2.31693	3.58455e-06	7.34832e-06
LOC727924	2.85674	2.21979	1.00942e-07	2.38953e-07
LINC00628	1.82549	3.59469	5.58842e-21	3.81017e-20
LINC01163	1.62857	3.05424	1.08545e-12	4.0309e-12
PTENP1-AS	-2.52161	2.75761	3.45146e-55	1.10617e-53
SCHLAP1	2.55093	2.89288	3.55636e-06	7.29876e-06
SAMD12-AS1	1.93782	5.562	4.71295e-42	9.20542e-41
LINC00602	1.95883	2.90706	7.57308e-08	1.81157e-07
